# Supplementary material
Source: HighWire-hosted journal article supplement (https://bmjopensem.bmj.com/content/8/3/e001291)
Supplement: inline-supplementary-material-2 [file inline-supplementary-material-2.xlsx]

## Sheet: Table_S11_SNP_Associations
Measure	Exposure	Outcome	SNP	Chromosome	Position	Effect Allele	Other Allele	Sample Size (Exposure)	EAF (Exposure)	Beta (Exposure)	SE (Exposure)	r2 (Exposure)	p (Exposure)	Sample Size (Outcome)	EAF (Outcome)	Beta (Outcome)	SE (Outcome)	r2 (Outcome)	p (Outcome)
Self Report	Sedentary Behavior	BMI	rs10041724	5	124273520	T	C	422218	0.808	0.018	0.003	0.000116	<0.001	236181	0.783	0.006	0.005	8.2e-06	0.1641
Self Report	Sedentary Behavior	BMI	rs10145592	14	94287215	C	G	422218	0.409	-0.015	0.002	0.00012	<0.001	235996	0.408	-0.002	0.004	1.64e-06	0.5342
Self Report	Sedentary Behavior	BMI	rs10189857	2	60713235	A	G	422218	0.568	-0.02	0.002	0.000234	<0.001	235664	0.433	-0.002	0.004	1.12e-06	0.6076
Self Report	Sedentary Behavior	BMI	rs1022785	14	29571653	G	A	422218	0.142	0.018	0.003	8.89e-05	<0.001	236173	0.867	0.006	0.005	5.1e-06	0.2722
Self Report	Sedentary Behavior	BMI	rs10234444	7	41828527	G	A	422218	0.823	0.016	0.003	8.17e-05	<0.001	236036	0.125	0.001	0.005	1.97e-07	0.8292
Self Report	Sedentary Behavior	BMI	rs1031423	5	93276883	T	C	422218	0.215	-0.019	0.003	0.000132	<0.001	235738	0.2	-0.002	0.005	1.2e-06	0.5948
Self Report	Sedentary Behavior	BMI	rs10737620	1	193057971	T	A	422218	0.274	0.014	0.002	9.41e-05	<0.001	236086	0.28	-0.008	0.004	1.61e-05	0.0512
Self Report	Sedentary Behavior	BMI	rs10876864	12	56401085	G	A	422218	0.427	-0.013	0.002	9.91e-05	<0.001	236156	0.642	-0.008	0.004	1.94e-05	0.0324
Self Report	Sedentary Behavior	BMI	rs10932837	2	221044785	C	T	422218	0.494	-0.013	0.002	9.77e-05	<0.001	236112	0.492	0.002	0.004	1.73e-06	0.5229
Self Report	Sedentary Behavior	BMI	rs11201422	10	86924483	T	C	422218	0.669	0.013	0.002	8.09e-05	<0.001	232418	0.308	0.006	0.004	8.74e-06	0.1542
Self Report	Sedentary Behavior	BMI	rs11218575	11	122154576	C	T	422218	0.566	0.015	0.002	0.000131	<0.001	235093	0.558	0	0.004	1.24e-08	0.9569
Self Report	Sedentary Behavior	BMI	rs11245482	10	126733546	T	C	422218	0.613	-0.013	0.002	9.41e-05	<0.001	235699	0.625	-0.008	0.004	1.57e-05	0.0545
Self Report	Sedentary Behavior	BMI	rs11689199	2	100820421	A	G	422218	0.598	0.018	0.002	0.000186	<0.001	236126	0.358	0.011	0.004	4.02e-05	0.0021
Self Report	Sedentary Behavior	BMI	rs11763734	7	126400910	A	C	422218	0.51	-0.012	0.002	8.82e-05	<0.001	236173	0.467	0.002	0.004	1.44e-06	0.5597
Self Report	Sedentary Behavior	BMI	rs11985394	8	92667521	T	A	422218	0.545	0.012	0.002	8.58e-05	<0.001	236151	0.592	-0.002	0.004	1.73e-06	0.5229
Self Report	Sedentary Behavior	BMI	rs12105701	2	41737200	C	T	422218	0.396	-0.013	0.002	9.03e-05	<0.001	236019	0.392	-0.014	0.004	5.72e-05	<0.001
Self Report	Sedentary Behavior	BMI	rs12289262	11	12894758	C	T	422218	0.731	-0.014	0.002	8.36e-05	<0.001	235990	0.658	-0.011	0.004	3.01e-05	0.0077
Self Report	Sedentary Behavior	BMI	rs1243182	10	21916728	C	T	422218	0.69	-0.019	0.002	0.000167	<0.001	236152	0.717	-0.012	0.004	3.94e-05	0.0023
Self Report	Sedentary Behavior	BMI	rs12491503	3	165706855	G	A	422218	0.67	-0.014	0.002	0.000102	<0.001	236091	0.625	0.001	0.004	1.78e-07	0.8375
Self Report	Sedentary Behavior	BMI	rs13029509	2	215374209	G	A	422218	0.52	-0.018	0.002	0.000191	<0.001	235782	0.442	-0.004	0.004	4.71e-06	0.2919
Self Report	Sedentary Behavior	BMI	rs1421334	8	30865733	A	C	422218	0.45	0.017	0.002	0.000167	<0.001	235423	0.442	0.01	0.004	3.29e-05	0.0054
Self Report	Sedentary Behavior	BMI	rs1563908	5	60437381	A	G	422218	0.62	0.016	0.002	0.000143	<0.001	235633	0.367	-0.004	0.004	4.24e-06	0.3173
Self Report	Sedentary Behavior	BMI	rs17207890	11	95490754	G	A	422218	0.657	0.016	0.002	0.000125	<0.001	233703	0.292	0	0.004	2.66e-09	0.9801
Self Report	Sedentary Behavior	BMI	rs17379561	1	98340139	A	T	422218	0.856	-0.025	0.003	0.000183	<0.001	236013	0.883	-0.009	0.005	1.35e-05	0.0744
Self Report	Sedentary Behavior	BMI	rs17568389	7	8091876	T	A	422218	0.487	0.015	0.002	0.000136	<0.001	235707	0.492	0.001	0.004	2.65e-07	0.8026
Self Report	Sedentary Behavior	BMI	rs17727474	10	127182959	C	T	422218	0.832	0.018	0.003	9.32e-05	<0.001	235921	0.217	-0.006	0.005	6.4e-06	0.219
Self Report	Sedentary Behavior	BMI	rs17789218	6	100600097	T	C	422218	0.756	0.019	0.003	0.000145	<0.001	337478	0.267	-0.007	0.004	1.05e-05	0.0597
Self Report	Sedentary Behavior	BMI	rs2045147	10	56660437	A	G	422218	0.449	0.013	0.002	8.99e-05	<0.001	236161	0.625	0.003	0.004	2.75e-06	0.4205
Self Report	Sedentary Behavior	BMI	rs2060199	2	166196681	T	A	422218	0.446	0.012	0.002	8.26e-05	<0.001	236010	0.492	0.005	0.004	8.84e-06	0.1486
Self Report	Sedentary Behavior	BMI	rs2073869	9	135763816	C	T	422218	0.834	0.019	0.003	0.000109	<0.001	235834	0.792	0.012	0.005	2.52e-05	0.0148
Self Report	Sedentary Behavior	BMI	rs2460	15	53073084	G	A	422218	0.736	-0.015	0.002	0.000103	<0.001	235478	0.742	-0.01	0.004	2.17e-05	0.0237
Self Report	Sedentary Behavior	BMI	rs2616830	9	1721385	G	A	422218	0.462	0.016	0.002	0.000153	<0.001	236093	0.55	0.002	0.004	1.73e-06	0.5229
Self Report	Sedentary Behavior	BMI	rs2787374	9	103054951	T	C	422218	0.408	0.012	0.002	8.62e-05	<0.001	236177	0.408	0.01	0.004	2.85e-05	0.0095
Self Report	Sedentary Behavior	BMI	rs374722	2	147839830	G	A	422218	0.15	0.024	0.003	0.000174	<0.001	236040	0.142	0.013	0.005	3.12e-05	0.0066
Self Report	Sedentary Behavior	BMI	rs3796386	3	49899795	G	A	422218	0.572	-0.026	0.002	0.000383	<0.001	236163	0.467	-0.009	0.004	2.56e-05	0.0139
Self Report	Sedentary Behavior	BMI	rs4334769	4	130245233	G	T	422218	0.474	0.012	0.002	8.33e-05	<0.001	234781	0.517	0.002	0.004	1.01e-06	0.6266
Self Report	Sedentary Behavior	BMI	rs4382592	9	134870755	T	G	422218	0.301	0.014	0.002	8.92e-05	<0.001	235985	0.725	0.005	0.004	6.36e-06	0.2206
Self Report	Sedentary Behavior	BMI	rs4435081	12	74331820	C	T	422218	0.53	0.012	0.002	8.29e-05	<0.001	236147	0.567	-0.004	0.004	5.23e-06	0.2665
Self Report	Sedentary Behavior	BMI	rs4675246	2	202864487	G	T	422218	0.797	-0.015	0.003	8.17e-05	<0.001	224396	0.842	-0.001	0.005	2.34e-07	0.8187
Self Report	Sedentary Behavior	BMI	rs4845364	1	154141908	A	G	422218	0.495	-0.015	0.002	0.000134	<0.001	235945	0.543	0	0.004	3.28e-09	0.9778
Self Report	Sedentary Behavior	BMI	rs4937842	11	133734542	G	C	422218	0.634	-0.013	0.002	8.54e-05	<0.001	234905	0.6	0.005	0.004	7.57e-06	0.1824
Self Report	Sedentary Behavior	BMI	rs6673341	1	184655649	T	G	422218	0.465	-0.015	0.002	0.000119	<0.001	234239	0.508	0.001	0.004	2.53e-07	0.8078
Self Report	Sedentary Behavior	BMI	rs6754968	2	105414479	G	A	422218	0.653	-0.014	0.002	0.000104	<0.001	236015	0.283	-0.011	0.004	3.37e-05	0.0048
Self Report	Sedentary Behavior	BMI	rs6825241	4	152543783	C	A	422218	0.536	-0.017	0.002	0.000163	<0.001	236048	0.558	-0.004	0.004	4.47e-06	0.3041
Self Report	Sedentary Behavior	BMI	rs6905544	6	98411631	A	G	422218	0.399	-0.019	0.002	0.000196	<0.001	236146	0.508	-0.011	0.004	4.02e-05	0.0021
Self Report	Sedentary Behavior	BMI	rs6973656	7	77422583	A	G	422218	0.603	-0.013	0.002	9.91e-05	<0.001	236132	0.492	-0.007	0.004	1.39e-05	0.0702
Self Report	Sedentary Behavior	BMI	rs6996198	8	65463442	C	T	422218	0.843	-0.016	0.003	8.07e-05	<0.001	236059	0.875	-0.006	0.005	7.23e-06	0.1915
Self Report	Sedentary Behavior	BMI	rs707919	6	31641139	A	G	422218	0.717	-0.014	0.002	8.44e-05	<0.001	234767	0.708	0.005	0.004	6.66e-06	0.2113
Self Report	Sedentary Behavior	BMI	rs7089973	10	116569565	C	A	422218	0.619	-0.013	0.002	9.45e-05	<0.001	226233	0.617	-0.004	0.004	4.42e-06	0.3173
Self Report	Sedentary Behavior	BMI	rs749671	16	31088347	G	A	422218	0.629	0.016	0.002	0.00013	<0.001	339168	0.625	0.019	0.003	0.000119	<0.001
Self Report	Sedentary Behavior	BMI	rs7564130	2	50606642	T	C	422218	0.641	-0.015	0.002	0.000118	<0.001	236136	0.417	NA	0.004	0	1
Self Report	Sedentary Behavior	BMI	rs7693703	4	118357405	G	A	422218	0.91	0.023	0.004	9.39e-05	<0.001	236151	0.05	0.002	0.006	3.08e-07	0.7873
Self Report	Sedentary Behavior	BMI	rs7700107	4	17880416	A	C	422218	0.863	-0.021	0.003	0.00012	<0.001	236049	0.858	-0.002	0.006	8.15e-07	0.661
Self Report	Sedentary Behavior	BMI	rs801733	11	65934549	A	C	422218	0.641	0.017	0.002	0.000149	<0.001	294218	0.308	0.003	0.003	2.54e-06	0.3876
Self Report	Sedentary Behavior	BMI	rs8043253	15	41503730	C	T	422218	0.573	-0.012	0.002	8.09e-05	<0.001	230183	0.383	-0.002	0.004	1.03e-06	0.6266
Self Report	Sedentary Behavior	BMI	rs870151	9	92230747	T	A	422218	0.528	-0.016	0.002	0.000136	<0.001	235059	0.508	0.01	0.004	2.92e-05	0.0088
Self Report	Sedentary Behavior	BMI	rs8756	12	66359752	C	A	422218	0.485	-0.013	0.002	0.000102	<0.001	339072	0.525	0.008	0.003	2.42e-05	0.0042
Self Report	Sedentary Behavior	BMI	rs9326862	5	112054547	A	T	422218	0.468	0.012	0.002	8.22e-05	<0.001	235846	0.467	-0.003	0.004	2.38e-06	0.4533
Self Report	Sedentary Behavior	BMI	rs9563168	13	54247827	G	A	422218	0.791	0.018	0.003	0.000115	<0.001	236164	0.7	0.01	0.004	2.09e-05	0.0263
Self Report	Sedentary Behavior	BMI	rs973734	7	89387578	C	A	422218	0.152	0.017	0.003	8.51e-05	<0.001	235973	0.125	0.007	0.005	7.98e-06	0.1699
Self Report	Sedentary Behavior	BMI	rs9834970	3	36856030	T	C	422218	0.501	0.013	0.002	9.29e-05	<0.001	230175	0.517	0.006	0.004	1.3e-05	0.0837
Self Report	Moderate PA	BMI	rs10499298	6	155812936	C	T	360912	0.866	-0.016	0.003	6.35e-05	<0.001	236139	0.883	-0.004	0.005	2.94e-06	0.4047
Self Report	Moderate PA	BMI	rs10733788	10	63158105	T	C	360912	0.187	0.015	0.003	6.84e-05	<0.001	224426	0.8	0.008	0.005	1.2e-05	0.1014
Self Report	Moderate PA	BMI	rs11210871	1	43563682	C	G	360912	0.299	0.013	0.003	7.22e-05	<0.001	235482	0.358	-0.001	0.004	1.7e-07	0.8415
Self Report	Moderate PA	BMI	rs1125854	7	132242411	T	C	360912	0.372	0.011	0.002	6.04e-05	<0.001	181404	0.672	0.001	0.004	2.98e-07	0.8161
Self Report	Moderate PA	BMI	rs1148198	10	28369346	G	A	360912	0.804	0.013	0.003	5.96e-05	<0.001	200682	0.833	0.005	0.006	2.93e-06	0.4433
Self Report	Moderate PA	BMI	rs12515547	5	53669401	G	A	360912	0.784	0.013	0.003	5.92e-05	<0.001	236047	0.192	0.003	0.004	2.28e-06	0.4634
Self Report	Moderate PA	BMI	rs1362735	7	133713852	A	G	360912	0.654	0.011	0.002	6.12e-05	<0.001	230302	0.675	-0.001	0.004	2.31e-07	0.8175
Self Report	Moderate PA	BMI	rs17473484	5	115579763	T	C	360912	0.951	0.026	0.005	6.49e-05	<0.001	224201	0.917	-0.008	0.009	3.41e-06	0.3816
Self Report	Moderate PA	BMI	rs1800497	11	113400106	G	A	360912	0.798	-0.014	0.003	6.58e-05	<0.001	235467	0.775	-0.014	0.005	3.82e-05	0.0027
Self Report	Moderate PA	BMI	rs1941599	11	76722710	A	G	360912	0.696	0.013	0.003	6.78e-05	<0.001	222693	0.683	0.004	0.005	2.67e-06	0.4408
Self Report	Moderate PA	BMI	rs2041786	16	50505412	A	G	360912	0.844	0.015	0.003	6.49e-05	<0.001	236160	0.083	-0.005	0.005	3.33e-06	0.3752
Self Report	Moderate PA	BMI	rs4556752	15	37648685	C	T	360912	0.921	-0.02	0.004	6.23e-05	<0.001	194854	0.067	0.014	0.008	1.5e-05	0.0871
Self Report	Moderate PA	BMI	rs4895842	6	129028394	T	C	360912	0.315	-0.011	0.002	5.96e-05	<0.001	236173	0.317	-0.003	0.004	2.68e-06	0.4267
Self Report	Moderate PA	BMI	rs6137790	20	2365554	G	A	360912	0.556	0.011	0.002	6.01e-05	<0.001	236069	0.4	0.002	0.004	1.88e-06	0.505
Self Report	Moderate PA	BMI	rs6545389	2	54159764	A	G	360912	0.5	-0.013	0.002	8.43e-05	<0.001	235036	0.558	0.01	0.004	2.85e-05	0.0096
Self Report	Moderate PA	BMI	rs6950425	7	92876758	A	C	360912	0.961	-0.028	0.006	6.35e-05	<0.001	209032	0.95	-0.002	0.01	1.2e-07	0.8741
Self Report	Moderate PA	BMI	rs7697278	4	65377408	C	T	360912	0.43	-0.011	0.002	6.49e-05	<0.001	235696	0.533	-0.001	0.004	4.46e-07	0.7457
Self Report	Moderate PA	BMI	rs8070414	17	65432822	T	G	360912	0.89	0.018	0.004	6.97e-05	<0.001	231807	0.108	-0.008	0.006	7.21e-06	0.196
Self Report	Moderate PA	BMI	rs918113	12	67818850	G	A	360912	0.842	0.015	0.003	6.63e-05	<0.001	236176	0.9	0.008	0.005	1.19e-05	0.0942
Self Report	Moderate PA	BMI	rs9570029	13	59047500	A	G	360912	0.901	-0.018	0.004	5.85e-05	<0.001	224217	0.925	0.004	0.006	1.74e-06	0.532
Self Report	Moderate PA	BMI	rs960117	12	46220036	C	T	360912	0.188	-0.014	0.003	6.58e-05	<0.001	236160	0.817	-0.008	0.005	1.2e-05	0.0928
Self Report	Moderate-to-Vigorous PA	BMI	rs10041140	5	51378177	A	T	377234	0.733	0.012	0.003	6.47e-05	<0.001	237568	0.758	0.005	0.005	5.81e-06	0.2402
Self Report	Moderate-to-Vigorous PA	BMI	rs10145335	14	98547748	G	A	377234	0.749	-0.014	0.003	8.2e-05	<0.001	236056	0.8	-0.004	0.004	3.52e-06	0.3622
Self Report	Moderate-to-Vigorous PA	BMI	rs10157145	1	205261963	T	C	377234	0.496	-0.012	0.002	7.55e-05	<0.001	235462	0.536	-0.006	0.004	1.04e-05	0.117
Self Report	Moderate-to-Vigorous PA	BMI	rs10263128	7	50233535	C	T	377234	0.412	-0.014	0.002	0.000102	<0.001	236178	0.417	0.006	0.004	9.35e-06	0.1372
Self Report	Moderate-to-Vigorous PA	BMI	rs1043595	7	128410012	G	A	377234	0.717	0.014	0.002	9.15e-05	<0.001	234490	0.167	0.007	0.004	1.03e-05	0.1198
Self Report	Moderate-to-Vigorous PA	BMI	rs10506671	12	75522128	G	A	377234	0.911	-0.019	0.004	6.55e-05	<0.001	236170	0.092	-0.01	0.006	1.05e-05	0.1161
Self Report	Moderate-to-Vigorous PA	BMI	rs10973183	9	37066231	T	C	377234	0.462	0.013	0.002	9.06e-05	<0.001	236114	0.442	0.011	0.004	3.54e-05	0.0038
Self Report	Moderate-to-Vigorous PA	BMI	rs11048486	12	26524796	C	A	377234	0.835	0.014	0.003	5.73e-05	<0.001	201092	0.017	-0.015	0.014	5.55e-06	0.2908
Self Report	Moderate-to-Vigorous PA	BMI	rs11081859	18	31926289	G	A	377234	0.108	0.018	0.004	7.15e-05	<0.001	224347	0.108	0.012	0.006	2.23e-05	0.0253
Self Report	Moderate-to-Vigorous PA	BMI	rs11191275	10	104142800	C	T	377234	0.866	-0.015	0.003	6.02e-05	<0.001	226260	0.158	0	0.006	1.32e-08	0.9565
Self Report	Moderate-to-Vigorous PA	BMI	rs11628318	14	103040087	T	A	377234	0.25	-0.012	0.003	6.11e-05	<0.001	235575	0.217	-0.001	0.004	4.07e-07	0.7569
Self Report	Moderate-to-Vigorous PA	BMI	rs1186721	7	34974602	G	A	377234	0.684	-0.013	0.002	7.95e-05	<0.001	236178	0.275	-0.008	0.004	1.82e-05	0.038
Self Report	Moderate-to-Vigorous PA	BMI	rs12912808	15	95292223	C	T	377234	0.851	0.018	0.003	8.44e-05	<0.001	235188	0.133	-0.018	0.006	4.43e-05	0.0012
Self Report	Moderate-to-Vigorous PA	BMI	rs1296135	5	154922981	G	T	377234	0.068	-0.023	0.004	7.29e-05	<0.001	223594	0.067	-0.008	0.008	4.47e-06	0.3173
Self Report	Moderate-to-Vigorous PA	BMI	rs12979056	19	17862131	G	A	377234	0.542	-0.01	0.002	5.93e-05	<0.001	235310	0.533	0.004	0.004	4.03e-06	0.3299
Self Report	Moderate-to-Vigorous PA	BMI	rs13252533	8	104814032	A	G	377234	0.805	0.015	0.003	7.87e-05	<0.001	236078	0.217	0.002	0.004	1.2e-06	0.5938
Self Report	Moderate-to-Vigorous PA	BMI	rs1340704	13	76506657	C	T	377234	0.402	0.01	0.002	5.56e-05	<0.001	235131	0.525	0.003	0.004	3.23e-06	0.3833
Self Report	Moderate-to-Vigorous PA	BMI	rs1363060	2	54284584	G	A	377234	0.894	-0.019	0.004	7.2e-05	<0.001	236068	0.15	0.003	0.006	1.25e-06	0.5865
Self Report	Moderate-to-Vigorous PA	BMI	rs1443918	13	54034124	A	T	377234	0.382	-0.013	0.002	8.31e-05	<0.001	235813	0.433	0.007	0.004	1.39e-05	0.0702
Self Report	Moderate-to-Vigorous PA	BMI	rs17053454	13	57281368	G	A	377234	0.66	0.011	0.002	5.66e-05	<0.001	229550	0.708	-0.002	0.004	8.82e-07	0.6527
Self Report	Moderate-to-Vigorous PA	BMI	rs17151994	7	8633992	G	A	377234	0.738	0.014	0.003	7.63e-05	<0.001	236083	0.758	0.004	0.004	4.04e-06	0.329
Self Report	Moderate-to-Vigorous PA	BMI	rs17183317	4	171734020	A	G	377234	0.937	-0.022	0.005	5.97e-05	<0.001	223168	0.075	-0.01	0.008	7.34e-06	0.2005
Self Report	Moderate-to-Vigorous PA	BMI	rs1731951	7	137075847	T	A	377234	0.556	-0.01	0.002	5.62e-05	<0.001	235537	0.517	-0.006	0.004	9.38e-06	0.1372
Self Report	Moderate-to-Vigorous PA	BMI	rs17573850	13	44885589	A	G	377234	0.741	0.012	0.003	6.08e-05	<0.001	236134	0.725	-0.001	0.004	1.18e-07	0.8676
Self Report	Moderate-to-Vigorous PA	BMI	rs17818431	22	20052420	G	A	377234	0.839	0.015	0.003	6.47e-05	<0.001	236126	0.825	0.005	0.005	5.14e-06	0.2704
Self Report	Moderate-to-Vigorous PA	BMI	rs1857707	5	18277597	C	A	377234	0.855	-0.015	0.003	5.7e-05	<0.001	235716	0.808	-0.006	0.005	5.68e-06	0.2473
Self Report	Moderate-to-Vigorous PA	BMI	rs1921981	21	42422547	G	A	377234	0.674	0.013	0.002	8.03e-05	<0.001	235293	0.708	-0.01	0.004	2.63e-05	0.0128
Self Report	Moderate-to-Vigorous PA	BMI	rs1955896	14	99197274	A	G	377234	0.538	-0.01	0.002	5.67e-05	<0.001	235344	0.417	0.001	0.004	4.47e-07	0.7457
Self Report	Moderate-to-Vigorous PA	BMI	rs2035562	3	85056521	A	G	377234	0.328	-0.014	0.002	9.2e-05	<0.001	235664	0.7	-0.011	0.004	3.31e-05	0.0052
Self Report	Moderate-to-Vigorous PA	BMI	rs2148201	10	2323505	G	A	377234	0.509	-0.011	0.002	6.08e-05	<0.001	234421	0.475	-0.008	0.004	1.75e-05	0.0428
Self Report	Moderate-to-Vigorous PA	BMI	rs2240883	16	3645909	G	C	377234	0.987	-0.045	0.01	5.54e-05	<0.001	273682	0.983	-0.01	0.013	2.24e-06	0.4341
Self Report	Moderate-to-Vigorous PA	BMI	rs2267443	22	42287454	A	G	377234	0.381	0.011	0.002	5.73e-05	<0.001	235807	0.575	0.002	0.004	1.01e-06	0.6261
Self Report	Moderate-to-Vigorous PA	BMI	rs2267549	12	4771682	G	A	377234	0.546	0.011	0.002	5.83e-05	<0.001	233070	0.567	-0.003	0.004	2.71e-06	0.4267
Self Report	Moderate-to-Vigorous PA	BMI	rs2283249	11	17824372	T	G	377234	0.752	-0.013	0.003	6.3e-05	<0.001	235925	0.258	0.001	0.004	4.06e-07	0.7569
Self Report	Moderate-to-Vigorous PA	BMI	rs2388195	6	98283960	A	C	377234	0.561	-0.012	0.002	7.26e-05	<0.001	235596	0.358	-0.002	0.004	1.89e-06	0.505
Self Report	Moderate-to-Vigorous PA	BMI	rs2638463	12	89669785	G	A	377234	0.694	-0.012	0.003	5.57e-05	<0.001	235371	0.292	-0.006	0.004	9.56e-06	0.1336
Self Report	Moderate-to-Vigorous PA	BMI	rs2710477	2	210508116	T	A	377234	0.919	-0.021	0.004	6.89e-05	<0.001	235801	0.917	0.006	0.007	2.71e-06	0.4237
Self Report	Moderate-to-Vigorous PA	BMI	rs2721937	8	116633699	C	T	377234	0.815	-0.014	0.003	6.18e-05	<0.001	235396	0.817	0.009	0.005	1.66e-05	0.0479
Self Report	Moderate-to-Vigorous PA	BMI	rs293566	20	31097877	T	C	377234	0.669	-0.011	0.002	5.86e-05	<0.001	235663	0.75	0	0.004	1.12e-08	0.9591
Self Report	Moderate-to-Vigorous PA	BMI	rs2942127	1	204420067	G	A	377234	0.175	0.016	0.003	8.1e-05	<0.001	236152	0.805	0.008	0.005	1.13e-05	0.103
Self Report	Moderate-to-Vigorous PA	BMI	rs3774614	3	53841464	C	T	377234	0.459	0.011	0.002	6.92e-05	<0.001	235039	0.442	-0.008	0.004	1.84e-05	0.0374
Self Report	Moderate-to-Vigorous PA	BMI	rs3936938	1	181031797	G	A	377234	0.403	-0.011	0.002	6.11e-05	<0.001	230041	0.61	-0.008	0.004	1.93e-05	0.035
Self Report	Moderate-to-Vigorous PA	BMI	rs4281659	15	61844443	T	C	377234	0.865	0.017	0.003	7.53e-05	<0.001	224428	0.908	-0.002	0.005	4.42e-07	0.7529
Self Report	Moderate-to-Vigorous PA	BMI	rs4375758	18	49587092	G	A	377234	0.875	0.016	0.003	5.86e-05	<0.001	235561	0.883	0	0.005	1.31e-08	0.9557
Self Report	Moderate-to-Vigorous PA	BMI	rs4518438	5	88157552	T	C	377234	0.49	-0.011	0.002	6.97e-05	<0.001	235915	0.475	-0.003	0.004	2.38e-06	0.4533
Self Report	Moderate-to-Vigorous PA	BMI	rs4621354	3	173588268	C	T	377234	0.842	-0.014	0.003	5.55e-05	<0.001	236171	0.167	0.006	0.005	7.29e-06	0.1894
Self Report	Moderate-to-Vigorous PA	BMI	rs466727	20	15626740	G	C	377234	0.329	0.011	0.002	5.77e-05	<0.001	235760	0.367	0.009	0.004	2.15e-05	0.0244
Self Report	Moderate-to-Vigorous PA	BMI	rs4787924	16	24264538	G	A	377234	0.475	-0.011	0.002	6.41e-05	<0.001	236156	0.492	0.001	0.004	1.18e-07	0.8676
Self Report	Moderate-to-Vigorous PA	BMI	rs4886868	15	74353561	T	G	377234	0.414	-0.012	0.002	8.07e-05	<0.001	221790	0.25	0.003	0.004	2.78e-06	0.432
Self Report	Moderate-to-Vigorous PA	BMI	rs4947350	6	32767620	T	C	377234	0.8	0.017	0.003	0.000105	<0.001	234672	0.192	-0.003	0.004	2.43e-06	0.4499
Self Report	Moderate-to-Vigorous PA	BMI	rs526852	11	65891432	G	A	377234	0.421	-0.012	0.002	7.76e-05	<0.001	236157	0.592	0.001	0.004	1.18e-07	0.8676
Self Report	Moderate-to-Vigorous PA	BMI	rs5755125	22	34993396	C	G	377234	0.216	0.013	0.003	6.48e-05	<0.001	236119	0.233	0	0.004	3.34e-08	0.9292
Self Report	Moderate-to-Vigorous PA	BMI	rs662638	11	57686764	T	C	377234	0.444	0.012	0.002	7.4e-05	<0.001	236165	0.45	-0.001	0.004	5.52e-07	0.718
Self Report	Moderate-to-Vigorous PA	BMI	rs6743932	2	35005351	G	A	377234	0.803	-0.013	0.003	5.62e-05	<0.001	235943	0.142	0.002	0.005	4.32e-07	0.7496
Self Report	Moderate-to-Vigorous PA	BMI	rs6812265	4	139726791	C	T	377234	0.548	0.011	0.002	6.92e-05	<0.001	236134	0.467	0	0.004	3.1e-09	0.9784
Self Report	Moderate-to-Vigorous PA	BMI	rs6819429	4	159861907	T	C	377234	0.341	0.013	0.002	8.03e-05	<0.001	236118	0.333	0.006	0.004	1.14e-05	0.1008
Self Report	Moderate-to-Vigorous PA	BMI	rs6857	19	45392254	C	T	377234	0.83	-0.019	0.003	0.000108	<0.001	231865	0.158	0.021	0.005	6.51e-05	<0.001
Self Report	Moderate-to-Vigorous PA	BMI	rs710187	22	38204089	C	T	377234	0.442	0.01	0.002	5.95e-05	<0.001	236196	0.533	0.005	0.004	7.13e-06	0.1945
Self Report	Moderate-to-Vigorous PA	BMI	rs7188855	16	52469602	A	T	377234	0.556	0.012	0.002	7.2e-05	<0.001	236140	0.517	-0.004	0.004	6.33e-06	0.2216
Self Report	Moderate-to-Vigorous PA	BMI	rs719263	22	49685455	T	C	377234	0.195	-0.013	0.003	5.83e-05	<0.001	236179	0.192	0.007	0.004	9.11e-06	0.1425
Self Report	Moderate-to-Vigorous PA	BMI	rs7233752	18	67399208	A	G	377234	0.805	0.013	0.003	5.67e-05	<0.001	235767	0.208	-0.002	0.005	1.25e-06	0.5868
Self Report	Moderate-to-Vigorous PA	BMI	rs7508365	19	13151477	T	C	377234	0.28	-0.011	0.002	5.7e-05	<0.001	205504	0.242	0.003	0.005	1.68e-06	0.5572
Self Report	Moderate-to-Vigorous PA	BMI	rs7521047	1	154076366	T	C	377234	0.46	0.012	0.002	7.59e-05	<0.001	339063	0.595	0.004	0.003	4.73e-06	0.2054
Self Report	Moderate-to-Vigorous PA	BMI	rs7648547	3	41188000	A	C	377234	0.461	-0.012	0.002	7.55e-05	<0.001	233715	0.45	0.005	0.004	6.75e-06	0.209
Self Report	Moderate-to-Vigorous PA	BMI	rs7652008	3	127160434	T	C	377234	0.537	-0.011	0.002	6.11e-05	<0.001	235786	0.592	-0.001	0.004	2.65e-07	0.8026
Self Report	Moderate-to-Vigorous PA	BMI	rs7690846	4	113988045	T	C	377234	0.484	0.01	0.002	5.84e-05	<0.001	232485	0.517	0	0.004	1.13e-08	0.9591
Self Report	Moderate-to-Vigorous PA	BMI	rs7760670	6	73190006	C	T	377234	0.704	0.013	0.002	7.23e-05	<0.001	236132	0.717	0.002	0.004	1.65e-06	0.532
Self Report	Moderate-to-Vigorous PA	BMI	rs7804463	7	133447651	T	C	377234	0.53	0.015	0.002	0.000122	<0.001	235962	0.492	-0.002	0.004	7.36e-07	0.6769
Self Report	Moderate-to-Vigorous PA	BMI	rs8019978	14	55557284	G	A	377234	0.558	0.01	0.002	5.61e-05	<0.001	235298	0.492	0.003	0.004	3.36e-06	0.3741
Self Report	Moderate-to-Vigorous PA	BMI	rs8058726	16	83207316	A	T	377234	0.712	-0.011	0.002	5.84e-05	<0.001	234463	0.617	-0.002	0.004	8.64e-07	0.6527
Self Report	Moderate-to-Vigorous PA	BMI	rs868866	1	151761804	A	G	377234	0.501	-0.011	0.002	6.49e-05	<0.001	236028	0.5	-0.005	0.004	8.17e-06	0.1649
Self Report	Moderate-to-Vigorous PA	BMI	rs9513912	13	102187073	A	G	377234	0.962	-0.027	0.006	5.61e-05	<0.001	219473	0.025	0.002	0.01	2.3e-07	0.8224
Self Report	Moderate-to-Vigorous PA	BMI	rs9584870	13	99245866	T	C	377234	0.633	-0.011	0.002	5.9e-05	<0.001	235101	0.692	0.009	0.004	1.92e-05	0.0338
Self Report	Moderate-to-Vigorous PA	BMI	rs9919769	12	126827971	A	G	377234	0.774	-0.012	0.003	5.88e-05	<0.001	233544	0.775	0.006	0.004	7.36e-06	0.1898
Self Report	Moderate-to-Vigorous PA	BMI	rs997467	2	199182704	T	C	377234	0.428	-0.012	0.002	7.08e-05	<0.001	235949	0.55	-0.002	0.004	6.96e-07	0.6852
Self Report	Vigorous PA	BMI	rs10828266	10	22098701	A	G	261055	0.285	-0.007	0.001	5.71e-05	<0.001	224403	0.258	0.01	0.004	2.92e-05	0.0104
Self Report	Vigorous PA	BMI	rs11153258	6	111222552	C	T	261055	0.801	-0.008	0.002	5.64e-05	<0.001	225996	0.15	0.001	0.005	3.01e-07	0.7942
Self Report	Vigorous PA	BMI	rs11643648	16	78514583	C	T	261055	0.926	-0.012	0.003	6.11e-05	<0.001	224394	0.05	0.004	0.007	1.52e-06	0.5597
Self Report	Vigorous PA	BMI	rs12059540	1	154845256	T	G	261055	0.971	-0.019	0.004	6.22e-05	<0.001	230370	0.974	0.017	0.01	1.22e-05	0.0943
Self Report	Vigorous PA	BMI	rs12480549	20	14148547	G	A	261055	0.806	-0.008	0.002	5.73e-05	<0.001	235646	0.192	-0.001	0.005	1.92e-07	0.8315
Self Report	Vigorous PA	BMI	rs1248860	3	85015779	G	A	261055	0.484	-0.01	0.001	0.000146	<0.001	236109	0.408	-0.007	0.004	1.69e-05	0.0455
Self Report	Vigorous PA	BMI	rs12612409	2	69941287	C	T	261055	0.911	-0.011	0.002	6.14e-05	<0.001	232330	0.833	0.002	0.006	3.3e-07	0.7818
Self Report	Vigorous PA	BMI	rs13118259	4	139038611	G	C	261055	0.085	0.011	0.002	5.97e-05	<0.001	236015	0.083	NA	0.007	0	1
Self Report	Vigorous PA	BMI	rs13174601	5	51238100	T	C	261055	0.93	-0.013	0.003	6.18e-05	<0.001	142729	0.042	-0.009	0.017	1.77e-06	0.615
Self Report	Vigorous PA	BMI	rs13243553	7	133506955	G	A	261055	0.608	0.009	0.001	0.000112	<0.001	236095	0.525	-0.003	0.004	2.78e-06	0.4175
Self Report	Vigorous PA	BMI	rs13252533	8	104814032	A	G	261055	0.806	0.008	0.002	5.67e-05	<0.001	236078	0.217	0.002	0.004	1.2e-06	0.5938
Self Report	Vigorous PA	BMI	rs13375273	1	181819083	G	A	261055	0.677	-0.007	0.001	5.95e-05	<0.001	234936	NA	-0.001	0.004	1.7e-07	0.8415
Self Report	Vigorous PA	BMI	rs17219084	16	53855600	A	G	261055	0.624	-0.006	0.001	5.76e-05	<0.001	337140	0.375	0	0.003	6.31e-09	0.9632
Self Report	Vigorous PA	BMI	rs17597778	4	162902865	T	G	261055	0.888	0.01	0.002	5.73e-05	<0.001	236130	0.917	-0.01	0.006	1.12e-05	0.1037
Self Report	Vigorous PA	BMI	rs1774859	1	117872697	C	T	261055	0.635	-0.006	0.001	5.9e-05	<0.001	181821	0.69	0.008	0.004	2e-05	0.0565
Self Report	Vigorous PA	BMI	rs1857707	5	18277597	C	A	261055	0.855	-0.009	0.002	5.67e-05	<0.001	235716	0.808	-0.006	0.005	5.68e-06	0.2473
Self Report	Vigorous PA	BMI	rs2189464	7	8633758	C	T	261055	0.752	0.008	0.002	6.65e-05	<0.001	236039	0.758	0.005	0.004	5.08e-06	0.2734
Self Report	Vigorous PA	BMI	rs2253310	6	108888593	C	G	261055	0.374	0.009	0.001	0.000113	<0.001	236091	0.425	-0.013	0.004	5.56e-05	<0.001
Self Report	Vigorous PA	BMI	rs2663648	2	210491839	C	T	261055	0.884	-0.011	0.002	7.17e-05	<0.001	236093	0.875	0.005	0.006	3.4e-06	0.37
Self Report	Vigorous PA	BMI	rs2922754	2	225909316	G	A	261055	0.242	0.007	0.002	5.95e-05	<0.001	236083	0.183	0	0.004	9.62e-09	0.962
Self Report	Vigorous PA	BMI	rs328902	7	35020843	C	T	261055	0.685	-0.009	0.001	0.000102	<0.001	236154	0.275	-0.008	0.004	1.96e-05	0.0312
Self Report	Vigorous PA	BMI	rs336604	3	18620284	A	T	261055	0.301	0.007	0.001	6.05e-05	<0.001	236160	0.383	0.008	0.004	1.78e-05	0.0402
Self Report	Vigorous PA	BMI	rs3781411	10	126715436	C	T	261055	0.876	0.013	0.002	0.000105	<0.001	338575	0.858	0.009	0.004	1.2e-05	0.0435
Self Report	Vigorous PA	BMI	rs4375758	18	49587092	G	A	261055	0.875	0.01	0.002	7.17e-05	<0.001	235561	0.883	0	0.005	1.31e-08	0.9557
Self Report	Vigorous PA	BMI	rs4556111	8	113382838	T	C	261055	0.466	-0.007	0.001	7.15e-05	<0.001	236124	0.517	-0.003	0.004	3.78e-06	0.3449
Self Report	Vigorous PA	BMI	rs526852	11	65891432	G	A	261055	0.422	-0.007	0.001	6.38e-05	<0.001	236157	0.592	0.001	0.004	1.18e-07	0.8676
Self Report	Vigorous PA	BMI	rs5742915	15	74336633	T	C	261055	0.539	-0.007	0.001	6.68e-05	<0.001	338262	0.45	0.003	0.003	2.66e-06	0.3426
Self Report	Vigorous PA	BMI	rs577525	10	99769388	T	C	261055	0.437	0.006	0.001	6e-05	<0.001	236122	0.575	-0.01	0.004	2.95e-05	0.0083
Self Report	Vigorous PA	BMI	rs608410	1	88770663	T	C	261055	0.275	0.007	0.001	6.26e-05	<0.001	236108	0.792	-0.008	0.004	1.49e-05	0.0604
Self Report	Vigorous PA	BMI	rs6562062	13	60503637	G	A	261055	0.372	-0.006	0.001	5.76e-05	<0.001	181797	0.698	0.01	0.004	3.28e-05	0.0146
Self Report	Vigorous PA	BMI	rs6689056	1	24364531	G	A	261055	0.674	0.008	0.001	7.75e-05	<0.001	234095	0.603	0.008	0.004	1.59e-05	0.0538
Self Report	Vigorous PA	BMI	rs6912002	6	32765268	T	C	261055	0.673	0.008	0.001	8.47e-05	<0.001	337737	0.267	-0.003	0.003	2.06e-06	0.4043
Self Report	Vigorous PA	BMI	rs7160630	14	98637479	A	G	261055	0.792	-0.009	0.002	7.55e-05	<0.001	236159	0.783	-0.008	0.004	1.21e-05	0.0912
Self Report	Vigorous PA	BMI	rs7521837	1	154252860	T	C	261055	0.749	0.009	0.002	8.67e-05	<0.001	236149	0.758	0.007	0.004	1.15e-05	0.0987
Self Report	Vigorous PA	BMI	rs7715147	5	60053220	C	A	261055	0.758	-0.007	0.002	5.57e-05	<0.001	213219	0.775	-0.001	0.005	2.93e-07	0.8026
Self Report	Vigorous PA	BMI	rs7749938	6	10362511	C	T	261055	0.985	0.026	0.006	5.83e-05	<0.001	201392	0.025	-0.005	0.016	4.39e-07	0.7661
Self Report	Vigorous PA	BMI	rs8142972	22	41084530	T	C	261055	0.859	-0.01	0.002	6.78e-05	<0.001	236227	0.158	0.001	0.005	1.27e-07	0.8626
Self Report	Vigorous PA	BMI	rs920447	11	116108902	G	A	261055	0.814	0.009	0.002	6.82e-05	<0.001	224344	0.183	-0.002	0.005	6.99e-07	0.6922
Self Report	Vigorous PA	BMI	rs9324424	8	136900266	G	A	261055	0.741	0.007	0.001	6.35e-05	<0.001	236133	0.733	-0.006	0.004	9.68e-06	0.1305
Self Report	Vigorous PA	BMI	rs9387216	6	97729953	C	A	261055	0.748	-0.008	0.002	7.17e-05	<0.001	235782	0.242	0.007	0.004	1.18e-05	0.0956
Self Report	Strenuous Sports & Other Exercises	BMI	rs1007966	9	92213967	G	A	350492	0.493	0.005	0.001	6.02e-05	<0.001	235985	0.492	-0.01	0.004	3.2e-05	0.006
Self Report	Strenuous Sports & Other Exercises	BMI	rs10225928	7	85802734	A	G	350492	0.199	0.007	0.001	6e-05	<0.001	235672	0.2	0.002	0.004	8.38e-07	0.6567
Self Report	Strenuous Sports & Other Exercises	BMI	rs10821729	10	62099173	C	T	350492	0.49	-0.005	0.001	5.68e-05	<0.001	235751	0.492	-0.001	0.004	3.96e-07	0.7599
Self Report	Strenuous Sports & Other Exercises	BMI	rs10879547	12	73497463	C	T	350492	0.756	-0.006	0.001	5.7e-05	<0.001	235869	0.3	-0.005	0.004	6.01e-06	0.2339
Self Report	Strenuous Sports & Other Exercises	BMI	rs10946808	6	26233387	A	G	350492	0.727	-0.008	0.001	9.91e-05	<0.001	339111	0.717	0.006	0.003	9.79e-06	0.0684
Self Report	Strenuous Sports & Other Exercises	BMI	rs11210230	1	73860239	T	C	350492	0.881	-0.009	0.002	7.4e-05	<0.001	236096	0.85	0.004	0.006	1.92e-06	0.5011
Self Report	Strenuous Sports & Other Exercises	BMI	rs11625806	14	37022739	G	A	350492	0.592	-0.006	0.001	6.55e-05	<0.001	236165	0.625	0.004	0.004	4.95e-06	0.2797
Self Report	Strenuous Sports & Other Exercises	BMI	rs11934368	4	178899883	A	C	350492	0.728	0.006	0.001	5.86e-05	<0.001	236053	0.183	0.003	0.004	2.31e-06	0.4605
Self Report	Strenuous Sports & Other Exercises	BMI	rs12031924	1	96877405	C	T	350492	0.76	0.006	0.001	6.35e-05	<0.001	236106	0.758	-0.002	0.004	1.06e-06	0.6171
Self Report	Strenuous Sports & Other Exercises	BMI	rs12372334	12	23727824	A	T	350492	0.618	-0.005	0.001	5.71e-05	<0.001	235780	0.533	-0.001	0.004	2.51e-07	0.8078
Self Report	Strenuous Sports & Other Exercises	BMI	rs12477961	2	199495674	A	G	350492	0.418	-0.006	0.001	6.26e-05	<0.001	236077	0.358	-0.002	0.004	1.58e-06	0.5411
Self Report	Strenuous Sports & Other Exercises	BMI	rs1265178	6	31161229	G	A	350492	0.762	0.007	0.001	8.12e-05	<0.001	234767	0.258	-0.013	0.005	3.2e-05	0.0062
Self Report	Strenuous Sports & Other Exercises	BMI	rs12973258	19	19488718	T	C	350492	0.816	0.009	0.001	9.27e-05	<0.001	114642	NA	0.004	0.006	3.49e-06	0.5272
Self Report	Strenuous Sports & Other Exercises	BMI	rs13207819	6	97971404	G	A	350492	0.765	-0.007	0.001	6.7e-05	<0.001	235742	0.25	0.016	0.004	6.02e-05	<0.001
Self Report	Strenuous Sports & Other Exercises	BMI	rs13270385	8	105164753	T	C	350492	0.697	-0.006	0.001	5.68e-05	<0.001	236129	0.758	0.007	0.004	1.38e-05	0.0711
Self Report	Strenuous Sports & Other Exercises	BMI	rs13284832	9	128435126	A	C	350492	0.571	-0.005	0.001	6e-05	<0.001	235485	0.592	0	0.004	7.76e-08	0.8925
Self Report	Strenuous Sports & Other Exercises	BMI	rs1362910	8	30856464	A	G	350492	0.42	-0.006	0.001	6.45e-05	<0.001	295523	0.633	0.012	0.003	4.74e-05	<0.001
Self Report	Strenuous Sports & Other Exercises	BMI	rs1415035	6	69730452	C	T	350492	0.836	0.008	0.002	6.85e-05	<0.001	235771	0.908	-0.006	0.005	7.46e-06	0.1847
Self Report	Strenuous Sports & Other Exercises	BMI	rs1477117	12	109888779	G	A	350492	0.811	0.007	0.001	6.02e-05	<0.001	339113	0.183	-0.005	0.004	4.43e-06	0.2202
Self Report	Strenuous Sports & Other Exercises	BMI	rs1625595	11	66078129	C	T	350492	0.532	0.006	0.001	7.4e-05	<0.001	235967	0.475	-0.004	0.004	4.95e-06	0.2797
Self Report	Strenuous Sports & Other Exercises	BMI	rs1638525	17	19848594	G	C	350492	0.603	0.008	0.001	0.000114	<0.001	236181	0.592	-0.012	0.004	4.38e-05	0.0013
Self Report	Strenuous Sports & Other Exercises	BMI	rs17062635	5	163375485	G	A	350492	0.546	-0.006	0.001	6.5e-05	<0.001	235611	0.458	-0.013	0.004	5e-05	<0.001
Self Report	Strenuous Sports & Other Exercises	BMI	rs17145573	11	56969455	G	A	350492	0.89	-0.009	0.002	6.54e-05	<0.001	235983	0.158	-0.003	0.006	8.93e-07	0.6462
Self Report	Strenuous Sports & Other Exercises	BMI	rs173946	5	60488297	T	C	350492	0.605	-0.007	0.001	9.73e-05	<0.001	236172	0.383	-0.004	0.004	4.23e-06	0.3173
Self Report	Strenuous Sports & Other Exercises	BMI	rs17565975	11	111586950	G	A	350492	0.437	0.005	0.001	5.77e-05	<0.001	235425	0.467	0.002	0.004	6.98e-07	0.6852
Self Report	Strenuous Sports & Other Exercises	BMI	rs1932202	9	75970379	C	T	350492	0.752	0.007	0.001	6.86e-05	<0.001	232448	0.333	-0.006	0.004	7.4e-06	0.1898
Self Report	Strenuous Sports & Other Exercises	BMI	rs2148201	10	2323505	G	A	350492	0.508	-0.006	0.001	6.81e-05	<0.001	234421	0.475	-0.008	0.004	1.75e-05	0.0428
Self Report	Strenuous Sports & Other Exercises	BMI	rs2156044	18	33388938	G	C	350492	0.656	-0.006	0.001	5.79e-05	<0.001	235639	0.667	0.004	0.004	4.92e-06	0.2815
Self Report	Strenuous Sports & Other Exercises	BMI	rs2238046	12	2299998	A	C	350492	0.612	-0.006	0.001	6.5e-05	<0.001	236034	0.592	0.001	0.004	6.07e-07	0.7051
Self Report	Strenuous Sports & Other Exercises	BMI	rs2271271	10	75558867	G	A	350492	0.28	0.006	0.001	6.9e-05	<0.001	236068	0.275	-0.002	0.004	1.4e-06	0.5653
Self Report	Strenuous Sports & Other Exercises	BMI	rs2278480	3	25635743	T	C	350492	0.713	-0.006	0.001	5.71e-05	<0.001	234898	0.342	0.002	0.004	5.7e-07	0.7145
Self Report	Strenuous Sports & Other Exercises	BMI	rs246743	7	140690009	T	G	350492	0.147	0.008	0.002	6.66e-05	<0.001	230249	0.858	0.002	0.005	7.08e-07	0.6863
Self Report	Strenuous Sports & Other Exercises	BMI	rs2470893	15	75019449	C	T	350492	0.67	0.006	0.001	7.84e-05	<0.001	332551	0.725	-0.008	0.003	1.65e-05	0.0193
Self Report	Strenuous Sports & Other Exercises	BMI	rs2668196	3	165502709	A	T	350492	0.192	-0.007	0.001	6.4e-05	<0.001	229874	0.192	-0.004	0.005	2.7e-06	0.4311
Self Report	Strenuous Sports & Other Exercises	BMI	rs2821549	1	111184045	G	C	350492	0.721	0.006	0.001	6.26e-05	<0.001	233694	0.725	-0.003	0.004	2.22e-06	0.471
Self Report	Strenuous Sports & Other Exercises	BMI	rs2871340	2	100884117	G	T	350492	0.503	-0.006	0.001	7.48e-05	<0.001	235725	0.475	0.006	0.004	1.26e-05	0.085
Self Report	Strenuous Sports & Other Exercises	BMI	rs288071	2	210408416	A	G	350492	0.902	-0.011	0.002	8.36e-05	<0.001	235959	0.875	0.006	0.006	4.54e-06	0.3006
Self Report	Strenuous Sports & Other Exercises	BMI	rs3129334	4	3368526	T	C	350492	0.403	0.006	0.001	7.44e-05	<0.001	236149	0.367	-0.001	0.004	3.09e-07	0.787
Self Report	Strenuous Sports & Other Exercises	BMI	rs354364	6	66304163	T	C	350492	0.75	-0.006	0.001	5.57e-05	<0.001	236037	0.733	0.001	0.004	3.05e-07	0.7885
Self Report	Strenuous Sports & Other Exercises	BMI	rs3733876	5	176382995	G	A	350492	0.814	0.007	0.001	6.54e-05	<0.001	339195	0.8	0.012	0.004	3.02e-05	0.0014
Self Report	Strenuous Sports & Other Exercises	BMI	rs3771544	2	69771484	C	T	350492	0.608	-0.006	0.001	6.11e-05	<0.001	236019	0.558	-0.002	0.004	7.92e-07	0.6654
Self Report	Strenuous Sports & Other Exercises	BMI	rs400432	3	18623278	A	G	350492	0.301	0.006	0.001	6.83e-05	<0.001	236015	0.617	-0.008	0.004	1.92e-05	0.0333
Self Report	Strenuous Sports & Other Exercises	BMI	rs4084828	2	118893347	C	T	350492	0.463	-0.006	0.001	6.76e-05	<0.001	215512	0.5	0.004	0.004	4.21e-06	0.3409
Self Report	Strenuous Sports & Other Exercises	BMI	rs4411372	13	99130423	T	C	350492	0.72	-0.007	0.001	8.36e-05	<0.001	236148	0.783	0.009	0.004	2.1e-05	0.0261
Self Report	Strenuous Sports & Other Exercises	BMI	rs4432322	18	22689878	T	C	350492	0.359	-0.005	0.001	5.63e-05	<0.001	235660	0.367	0.004	0.004	4.68e-06	0.2937
Self Report	Strenuous Sports & Other Exercises	BMI	rs4601350	8	113329886	C	T	350492	0.451	-0.006	0.001	6.3e-05	<0.001	235930	0.55	-0.005	0.004	7.22e-06	0.1917
Self Report	Strenuous Sports & Other Exercises	BMI	rs4658403	1	243832560	C	T	350492	0.166	-0.008	0.002	6.76e-05	<0.001	235068	0.839	0.018	0.005	5.54e-05	<0.001
Self Report	Strenuous Sports & Other Exercises	BMI	rs4743038	9	109645987	A	T	350492	0.802	0.007	0.001	5.7e-05	<0.001	236022	0.783	0.003	0.004	2.01e-06	0.4909
Self Report	Strenuous Sports & Other Exercises	BMI	rs4799	2	10933249	C	T	350492	0.521	0.006	0.001	6.77e-05	<0.001	236043	0.433	-0.008	0.004	1.99e-05	0.0303
Self Report	Strenuous Sports & Other Exercises	BMI	rs4811141	20	49851464	G	A	350492	0.127	-0.008	0.002	6.57e-05	<0.001	80043.2	NA	0.004	0.009	2.65e-06	0.645
Self Report	Strenuous Sports & Other Exercises	BMI	rs4865667	5	50748173	C	T	350492	0.613	0.007	0.001	8.72e-05	<0.001	236162	0.567	-0.008	0.004	1.98e-05	0.0306
Self Report	Strenuous Sports & Other Exercises	BMI	rs4890829	18	74540433	C	T	350492	0.362	-0.006	0.001	6.22e-05	<0.001	236056	0.633	-0.005	0.004	7.74e-06	0.1766
Self Report	Strenuous Sports & Other Exercises	BMI	rs4899284	14	69650845	A	G	350492	0.355	0.007	0.001	8.58e-05	<0.001	236091	0.633	-0.004	0.004	4.91e-06	0.2815
Self Report	Strenuous Sports & Other Exercises	BMI	rs4900442	14	100158241	C	T	350492	0.539	-0.005	0.001	6.26e-05	<0.001	235261	0.55	-0.003	0.004	2.1e-06	0.4822
Self Report	Strenuous Sports & Other Exercises	BMI	rs526231	5	102681381	C	T	350492	0.672	-0.006	0.001	5.95e-05	<0.001	236110	0.383	-0.005	0.004	7.16e-06	0.1936
Self Report	Strenuous Sports & Other Exercises	BMI	rs577525	10	99769388	T	C	350492	0.437	0.006	0.001	7.02e-05	<0.001	236122	0.575	-0.01	0.004	2.95e-05	0.0083
Self Report	Strenuous Sports & Other Exercises	BMI	rs7002919	8	15874907	C	G	350492	0.918	-0.01	0.002	5.9e-05	<0.001	235835	0.908	0.001	0.007	7.66e-08	0.8931
Self Report	Strenuous Sports & Other Exercises	BMI	rs7031064	9	14455076	A	G	350492	0.517	-0.006	0.001	6.85e-05	<0.001	235500	0.45	0.008	0.004	2.2e-05	0.0227
Self Report	Strenuous Sports & Other Exercises	BMI	rs7034243	9	122688811	A	G	350492	0.659	-0.006	0.001	7.53e-05	<0.001	234779	0.308	-0.006	0.004	1.06e-05	0.1153
Self Report	Strenuous Sports & Other Exercises	BMI	rs705692	1	7480217	C	T	350492	0.108	-0.009	0.002	6.59e-05	<0.001	235945	0.875	-0.008	0.006	7.16e-06	0.1936
Self Report	Strenuous Sports & Other Exercises	BMI	rs7205420	16	8296948	A	T	350492	0.793	-0.007	0.001	6.3e-05	<0.001	235650	0.783	0.004	0.005	3.71e-06	0.3499
Self Report	Strenuous Sports & Other Exercises	BMI	rs7228225	18	53529456	A	T	350492	0.415	0.005	0.001	5.86e-05	<0.001	235743	0.417	-0.002	0.004	1.01e-06	0.6261
Self Report	Strenuous Sports & Other Exercises	BMI	rs7588028	2	1119227	G	A	350492	0.607	0.005	0.001	5.68e-05	<0.001	234963	0.583	0	0.004	6.99e-08	0.898
Self Report	Strenuous Sports & Other Exercises	BMI	rs7607737	2	183728290	C	T	350492	0.883	-0.008	0.002	5.7e-05	<0.001	236130	0.883	0.006	0.006	4.24e-06	0.3173
Self Report	Strenuous Sports & Other Exercises	BMI	rs7627864	3	49926613	C	G	350492	0.569	0.007	0.001	8.86e-05	<0.001	235729	0.533	0.011	0.004	3.89e-05	0.0025
Self Report	Strenuous Sports & Other Exercises	BMI	rs763187	6	166955738	A	G	350492	0.171	-0.008	0.002	6.89e-05	<0.001	223343	0.792	0.002	0.005	9.18e-07	0.6507
Self Report	Strenuous Sports & Other Exercises	BMI	rs7718022	5	147941845	G	C	350492	0.487	-0.005	0.001	5.97e-05	<0.001	234507	0.475	-0.006	0.004	1.01e-05	0.1234
Self Report	Strenuous Sports & Other Exercises	BMI	rs7740107	6	130374461	T	A	350492	0.264	-0.006	0.001	6.6e-05	<0.001	236058	0.25	0.014	0.004	5.23e-05	<0.001
Self Report	Strenuous Sports & Other Exercises	BMI	rs795980	4	140801666	A	G	350492	0.668	-0.006	0.001	6.35e-05	<0.001	338746	0.692	0.006	0.003	1.13e-05	0.0503
Self Report	Strenuous Sports & Other Exercises	BMI	rs896302	6	98806496	C	T	350492	0.287	0.007	0.001	8.44e-05	<0.001	236145	0.658	0.001	0.004	4.26e-07	0.7512
Self Report	Strenuous Sports & Other Exercises	BMI	rs9177	7	1787236	A	G	350492	0.51	0.006	0.001	6.75e-05	<0.001	201352	0.612	0	0.004	3.02e-08	0.9378
Self Report	Strenuous Sports & Other Exercises	BMI	rs9293777	5	78661452	C	T	350492	0.653	-0.006	0.001	6.18e-05	<0.001	229528	0.675	-0.007	0.004	1.32e-05	0.0822
Self Report	Strenuous Sports & Other Exercises	BMI	rs9420	11	57510294	A	G	350492	0.324	-0.006	0.001	5.7e-05	<0.001	236153	0.742	0.008	0.004	1.87e-05	0.0355
Self Report	Strenuous Sports & Other Exercises	BMI	rs9563168	13	54247827	G	A	350492	0.79	-0.007	0.001	6.02e-05	<0.001	236164	0.7	0.01	0.004	2.09e-05	0.0263
Self Report	Strenuous Sports & Other Exercises	BMI	rs9604803	22	18398207	C	A	350492	0.671	0.006	0.001	6.46e-05	<0.001	235931	0.358	0	0.004	6.96e-08	0.898
Self Report	Strenuous Sports & Other Exercises	BMI	rs968304	1	169094100	T	A	350492	0.411	-0.006	0.001	7.93e-05	<0.001	235104	0.467	0.006	0.004	1.19e-05	0.0938
Self Report	Strenuous Sports & Other Exercises	BMI	rs975942	9	25054752	C	G	350492	0.95	0.012	0.003	5.63e-05	<0.001	75213.8	NA	-0.043	0.044	1.26e-05	0.3306
Self Report	Strenuous Sports & Other Exercises	BMI	rs9861451	3	85409353	A	G	350492	0.273	0.011	0.001	0.0002	<0.001	236147	0.333	0.014	0.004	5.22e-05	<0.001
Self Report	Strenuous Sports & Other Exercises	BMI	rs9903845	17	50291181	C	A	350492	0.673	0.006	0.001	6.51e-05	<0.001	235771	0.642	-0.001	0.004	9.54e-08	0.8808
Self Report	Sedentary Behavior	WHR	rs10041724	5	124273520	T	C	422218	0.808	0.018	0.003	0.000116	<0.001	144596	0.783	0.011	0.005	2.75e-05	0.046
Self Report	Sedentary Behavior	WHR	rs10145592	14	94287215	C	G	422218	0.409	-0.015	0.002	0.00012	<0.001	144554	0.408	-0.007	0.004	1.99e-05	0.09
Self Report	Sedentary Behavior	WHR	rs10189857	2	60713235	A	G	422218	0.568	-0.02	0.002	0.000234	<0.001	144371	0.567	0	0.004	1.74e-08	0.96
Self Report	Sedentary Behavior	WHR	rs1022785	14	29571653	G	A	422218	0.142	0.018	0.003	8.89e-05	<0.001	144598	0.133	0.016	0.006	5.03e-05	0.007
Self Report	Sedentary Behavior	WHR	rs10234444	7	41828527	G	A	422218	0.823	0.016	0.003	8.17e-05	<0.001	144561	0.875	0.012	0.006	2.86e-05	0.042
Self Report	Sedentary Behavior	WHR	rs1031423	5	93276883	T	C	422218	0.215	-0.019	0.003	0.000132	<0.001	144493	0.2	-0.003	0.005	2.01e-06	0.59
Self Report	Sedentary Behavior	WHR	rs10737620	1	193057971	T	A	422218	0.274	0.014	0.002	9.41e-05	<0.001	144554	0.28	0.004	0.005	5.33e-06	0.38
Self Report	Sedentary Behavior	WHR	rs10876864	12	56401085	G	A	422218	0.427	-0.013	0.002	9.91e-05	<0.001	144587	0.358	-0.002	0.004	8.89e-07	0.72
Self Report	Sedentary Behavior	WHR	rs10932837	2	221044785	C	T	422218	0.494	-0.013	0.002	9.77e-05	<0.001	144576	0.508	0.002	0.004	8.89e-07	0.72
Self Report	Sedentary Behavior	WHR	rs11201422	10	86924483	T	C	422218	0.669	0.013	0.002	8.09e-05	<0.001	141248	0.692	0.008	0.005	2.16e-05	0.081
Self Report	Sedentary Behavior	WHR	rs11218575	11	122154576	C	T	422218	0.566	0.015	0.002	0.000131	<0.001	144233	0.558	0	0.004	5.35e-08	0.93
Self Report	Sedentary Behavior	WHR	rs11245482	10	126733546	T	C	422218	0.613	-0.013	0.002	9.41e-05	<0.001	144459	0.625	-0.007	0.004	1.67e-05	0.12
Self Report	Sedentary Behavior	WHR	rs11689199	2	100820421	A	G	422218	0.598	0.018	0.002	0.000186	<0.001	144556	0.642	0.009	0.004	2.98e-05	0.038
Self Report	Sedentary Behavior	WHR	rs11763734	7	126400910	A	C	422218	0.51	-0.012	0.002	8.82e-05	<0.001	144595	0.533	0	0.004	0	1
Self Report	Sedentary Behavior	WHR	rs11985394	8	92667521	T	A	422218	0.545	0.012	0.002	8.58e-05	<0.001	144582	0.592	0.001	0.004	6.45e-07	0.76
Self Report	Sedentary Behavior	WHR	rs12105701	2	41737200	C	T	422218	0.396	-0.013	0.002	9.03e-05	<0.001	144538	0.392	-0.004	0.004	7.43e-06	0.3
Self Report	Sedentary Behavior	WHR	rs12289262	11	12894758	C	T	422218	0.731	-0.014	0.002	8.36e-05	<0.001	144548	0.658	-0.01	0.005	2.81e-05	0.044
Self Report	Sedentary Behavior	WHR	rs1243182	10	21916728	C	T	422218	0.69	-0.019	0.002	0.000167	<0.001	144590	0.717	-0.011	0.005	3.87e-05	0.018
Self Report	Sedentary Behavior	WHR	rs12491503	3	165706855	G	A	422218	0.67	-0.014	0.002	0.000102	<0.001	144558	0.625	-0.004	0.004	5.11e-06	0.39
Self Report	Sedentary Behavior	WHR	rs13029509	2	215374209	G	A	422218	0.52	-0.018	0.002	0.000191	<0.001	144459	0.558	-0.001	0.004	2.48e-07	0.85
Self Report	Sedentary Behavior	WHR	rs13107325	4	103188709	C	T	422218	0.926	-0.029	0.004	0.000133	<0.001	211675	0.883	0	0.007	0	1
Self Report	Sedentary Behavior	WHR	rs1421334	8	30865733	A	C	422218	0.45	0.017	0.002	0.000167	<0.001	144307	0.442	0.006	0.004	1.37e-05	0.16
Self Report	Sedentary Behavior	WHR	rs1563908	5	60437381	A	G	422218	0.62	0.016	0.002	0.000143	<0.001	144485	0.633	0.004	0.004	5.33e-06	0.38
Self Report	Sedentary Behavior	WHR	rs17207890	11	95490754	G	A	422218	0.657	0.016	0.002	0.000125	<0.001	142574	0.708	0.001	0.005	5.47e-07	0.78
Self Report	Sedentary Behavior	WHR	rs17379561	1	98340139	A	T	422218	0.856	-0.025	0.003	0.000183	<0.001	144461	0.883	-0.014	0.006	3.81e-05	0.019
Self Report	Sedentary Behavior	WHR	rs17568389	7	8091876	T	A	422218	0.487	0.015	0.002	0.000136	<0.001	144446	0.492	0.004	0.004	5.34e-06	0.38
Self Report	Sedentary Behavior	WHR	rs17727474	10	127182959	C	T	422218	0.832	0.018	0.003	9.32e-05	<0.001	144498	0.783	0.003	0.006	1.61e-06	0.63
Self Report	Sedentary Behavior	WHR	rs17789218	6	100600097	T	C	422218	0.756	0.019	0.003	0.000145	<0.001	212162	0.733	0.005	0.004	6.79e-06	0.23
Self Report	Sedentary Behavior	WHR	rs2045147	10	56660437	A	G	422218	0.449	0.013	0.002	8.99e-05	<0.001	144583	0.375	0.003	0.004	3.78e-06	0.46
Self Report	Sedentary Behavior	WHR	rs2060199	2	166196681	T	A	422218	0.446	0.012	0.002	8.26e-05	<0.001	144546	0.492	-0.005	0.004	8.42e-06	0.27
Self Report	Sedentary Behavior	WHR	rs2073869	9	135763816	C	T	422218	0.834	0.019	0.003	0.000109	<0.001	144519	0.792	0.012	0.005	3.22e-05	0.031
Self Report	Sedentary Behavior	WHR	rs2460	15	53073084	G	A	422218	0.736	-0.015	0.002	0.000103	<0.001	144389	0.742	-0.004	0.005	5.12e-06	0.39
Self Report	Sedentary Behavior	WHR	rs2616830	9	1721385	G	A	422218	0.462	0.016	0.002	0.000153	<0.001	144555	0.55	-0.003	0.004	4.31e-06	0.43
Self Report	Sedentary Behavior	WHR	rs2787374	9	103054951	T	C	422218	0.408	0.012	0.002	8.62e-05	<0.001	144593	0.408	0.001	0.004	1.85e-07	0.87
Self Report	Sedentary Behavior	WHR	rs374722	2	147839830	G	A	422218	0.15	0.024	0.003	0.000174	<0.001	144515	0.142	0.008	0.006	1.19e-05	0.19
Self Report	Sedentary Behavior	WHR	rs3796386	3	49899795	G	A	422218	0.572	-0.026	0.002	0.000383	<0.001	144589	0.533	-0.005	0.004	8.42e-06	0.27
Self Report	Sedentary Behavior	WHR	rs4334769	4	130245233	G	T	422218	0.474	0.012	0.002	8.33e-05	<0.001	144280	0.483	0.007	0.004	1.94e-05	0.094
Self Report	Sedentary Behavior	WHR	rs4382592	9	134870755	T	G	422218	0.301	0.014	0.002	8.92e-05	<0.001	144527	0.275	0.01	0.004	3.3e-05	0.029
Self Report	Sedentary Behavior	WHR	rs4435081	12	74331820	C	T	422218	0.53	0.012	0.002	8.29e-05	<0.001	144587	0.567	0.001	0.004	6.45e-07	0.76
Self Report	Sedentary Behavior	WHR	rs4675246	2	202864487	G	T	422218	0.797	-0.015	0.003	8.17e-05	<0.001	132836	0.842	-0.002	0.006	5.34e-07	0.79
Self Report	Sedentary Behavior	WHR	rs4845364	1	154141908	A	G	422218	0.495	-0.015	0.002	0.000134	<0.001	144536	0.543	0.001	0.004	4.91e-07	0.79
Self Report	Sedentary Behavior	WHR	rs4937842	11	133734542	G	C	422218	0.634	-0.013	0.002	8.54e-05	<0.001	144179	0.6	-0.002	0.004	8.91e-07	0.72
Self Report	Sedentary Behavior	WHR	rs6472942	8	76827190	T	C	422218	0.568	-0.013	0.002	9.6e-05	<0.001	144516	0.5	-0.003	0.004	2.6e-06	0.54
Self Report	Sedentary Behavior	WHR	rs6673341	1	184655649	T	G	422218	0.465	-0.015	0.002	0.000119	<0.001	144137	0.492	0.003	0.004	2.87e-06	0.52
Self Report	Sedentary Behavior	WHR	rs6754968	2	105414479	G	A	422218	0.653	-0.014	0.002	0.000104	<0.001	144539	0.717	-0.002	0.004	8.89e-07	0.72
Self Report	Sedentary Behavior	WHR	rs6825241	4	152543783	C	A	422218	0.536	-0.017	0.002	0.000163	<0.001	144566	0.558	-0.008	0.004	2.78e-05	0.045
Self Report	Sedentary Behavior	WHR	rs6905544	6	98411631	A	G	422218	0.399	-0.019	0.002	0.000196	<0.001	144588	0.492	-0.006	0.004	1.14e-05	0.2
Self Report	Sedentary Behavior	WHR	rs6973656	7	77422583	A	G	422218	0.603	-0.013	0.002	9.91e-05	<0.001	144552	0.508	0.008	0.004	2.63e-05	0.051
Self Report	Sedentary Behavior	WHR	rs6996198	8	65463442	C	T	422218	0.843	-0.016	0.003	8.07e-05	<0.001	144573	0.875	-0.001	0.006	3.19e-07	0.83
Self Report	Sedentary Behavior	WHR	rs707919	6	31641139	A	G	422218	0.717	-0.014	0.002	8.44e-05	<0.001	143197	0.708	-0.013	0.004	5.41e-05	0.0054
Self Report	Sedentary Behavior	WHR	rs7089973	10	116569565	C	A	422218	0.619	-0.013	0.002	9.45e-05	<0.001	135006	0.617	-0.005	0.004	9.8e-06	0.25
Self Report	Sedentary Behavior	WHR	rs7189927	16	28913787	T	C	422218	0.356	0.015	0.002	0.000117	<0.001	182888	0.292	0.014	0.004	7.51e-05	<0.001
Self Report	Sedentary Behavior	WHR	rs749671	16	31088347	G	A	422218	0.629	0.016	0.002	0.00013	<0.001	212171	0.625	0.006	0.003	1.58e-05	0.067
Self Report	Sedentary Behavior	WHR	rs7564130	2	50606642	T	C	422218	0.641	-0.015	0.002	0.000118	<0.001	144578	0.583	0.004	0.004	6.3e-06	0.34
Self Report	Sedentary Behavior	WHR	rs7693703	4	118357405	G	A	422218	0.91	0.023	0.004	9.39e-05	<0.001	144575	0.95	0.009	0.007	9.97e-06	0.23
Self Report	Sedentary Behavior	WHR	rs7700107	4	17880416	A	C	422218	0.863	-0.021	0.003	0.00012	<0.001	144527	0.858	-0.012	0.006	2.43e-05	0.061
Self Report	Sedentary Behavior	WHR	rs801733	11	65934549	A	C	422218	0.641	0.017	0.002	0.000149	<0.001	182960	0.692	0.001	0.004	2.23e-07	0.84
Self Report	Sedentary Behavior	WHR	rs8043253	15	41503730	C	T	422218	0.573	-0.012	0.002	8.09e-05	<0.001	142359	0.617	0.004	0.004	5.41e-06	0.38
Self Report	Sedentary Behavior	WHR	rs870151	9	92230747	T	A	422218	0.528	-0.016	0.002	0.000136	<0.001	144308	0.508	0.01	0.004	3.58e-05	0.023
Self Report	Sedentary Behavior	WHR	rs8756	12	66359752	C	A	422218	0.485	-0.013	0.002	0.000102	<0.001	212140	0.475	0.005	0.003	1.08e-05	0.13
Self Report	Sedentary Behavior	WHR	rs9326862	5	112054547	A	T	422218	0.468	0.012	0.002	8.22e-05	<0.001	144505	0.467	0.006	0.004	1.51e-05	0.14
Self Report	Sedentary Behavior	WHR	rs9563168	13	54247827	G	A	422218	0.791	0.018	0.003	0.000115	<0.001	144591	0.7	0	0.005	2.72e-08	0.95
Self Report	Sedentary Behavior	WHR	rs973734	7	89387578	C	A	422218	0.152	0.017	0.003	8.51e-05	<0.001	144554	0.125	-0.002	0.006	8.24e-07	0.73
Self Report	Sedentary Behavior	WHR	rs9834970	3	36856030	T	C	422218	0.501	0.013	0.002	9.29e-05	<0.001	142356	0.483	0.008	0.004	2.68e-05	0.051
Self Report	Moderate PA	WHR	rs10499298	6	156134070	C	T	360912	0.866	-0.016	0.003	6.35e-05	<0.001	144585	0.883	-0.001	0.006	2.47e-07	0.85
Self Report	Moderate PA	WHR	rs10733788	10	64917865	T	C	360912	0.187	0.015	0.003	6.84e-05	<0.001	132854	0.2	0.015	0.006	5.93e-05	0.005
Self Report	Moderate PA	WHR	rs11210871	1	44029353	C	G	360912	0.299	0.013	0.003	7.22e-05	<0.001	143984	0.358	0.004	0.004	6.87e-06	0.32
Self Report	Moderate PA	WHR	rs1125854	7	131927170	T	C	360912	0.372	0.011	0.002	6.04e-05	<0.001	104102	0.328	-0.004	0.005	5.48e-06	0.45
Self Report	Moderate PA	WHR	rs1148198	10	28658275	G	A	360912	0.804	0.013	0.003	5.96e-05	<0.001	115160	0.833	0	0.007	2.18e-08	0.96
Self Report	Moderate PA	WHR	rs12515547	5	52965231	G	A	360912	0.784	0.013	0.003	5.92e-05	<0.001	144483	0.808	0.007	0.005	1.3e-05	0.17
Self Report	Moderate PA	WHR	rs1362735	7	133398605	A	G	360912	0.654	0.011	0.002	6.12e-05	<0.001	142384	0.675	-0.001	0.004	2.18e-07	0.86
Self Report	Moderate PA	WHR	rs17473484	5	114915460	T	C	360912	0.951	0.026	0.005	6.49e-05	<0.001	132695	0.917	-0.014	0.01	1.42e-05	0.17
Self Report	Moderate PA	WHR	rs1800497	11	113270828	G	A	360912	0.798	-0.014	0.003	6.58e-05	<0.001	143938	0.775	-0.013	0.005	4.29e-05	0.013
Self Report	Moderate PA	WHR	rs1941599	11	76433754	A	G	360912	0.696	0.013	0.003	6.78e-05	<0.001	133471	0.683	-0.002	0.006	5.31e-07	0.79
Self Report	Moderate PA	WHR	rs2041786	16	50539323	A	G	360912	0.844	0.015	0.003	6.49e-05	<0.001	144593	0.917	0.007	0.006	8.77e-06	0.26
Self Report	Moderate PA	WHR	rs4556752	15	37940886	C	T	360912	0.921	-0.02	0.004	6.23e-05	<0.001	120359	0.933	0.003	0.01	9.9e-07	0.73
Self Report	Moderate PA	WHR	rs4895842	6	129349539	T	C	360912	0.315	-0.011	0.002	5.96e-05	<0.001	144592	0.317	-0.007	0.004	1.67e-05	0.12
Self Report	Moderate PA	WHR	rs6137790	20	2346200	G	A	360912	0.556	0.011	0.002	6.01e-05	<0.001	144552	0.6	0	0.004	1.74e-08	0.96
Self Report	Moderate PA	WHR	rs6545389	2	54386901	A	G	360912	0.5	-0.013	0.002	8.43e-05	<0.001	144337	0.442	0.007	0.004	1.59e-05	0.13
Self Report	Moderate PA	WHR	rs6950425	7	92506072	A	C	360912	0.961	-0.028	0.006	6.35e-05	<0.001	118589	0.95	-0.01	0.012	5.48e-06	0.42
Self Report	Moderate PA	WHR	rs7697278	4	66243126	C	T	360912	0.43	-0.011	0.002	6.49e-05	<0.001	144427	0.467	-0.007	0.004	1.87e-05	0.1
Self Report	Moderate PA	WHR	rs8070414	17	63428940	T	G	360912	0.89	0.018	0.004	6.97e-05	<0.001	144538	0.892	0.006	0.007	6.57e-06	0.33
Self Report	Moderate PA	WHR	rs918113	12	68212630	G	A	360912	0.842	0.015	0.003	6.63e-05	<0.001	144596	0.9	0.003	0.006	2.12e-06	0.58
Self Report	Moderate PA	WHR	rs9570029	13	59621634	A	G	360912	0.901	-0.018	0.004	5.85e-05	<0.001	132842	0.925	-0.011	0.007	1.56e-05	0.15
Self Report	Moderate PA	WHR	rs960117	12	46613819	C	T	360912	0.188	-0.014	0.003	6.58e-05	<0.001	144588	0.183	-0.001	0.005	8.84e-08	0.91
Self Report	Moderate-to-Vigorous PA	WHR	rs10041140	5	51378177	A	T	377234	0.733	0.012	0.003	6.47e-05	<0.001	144601	0.758	0.004	0.005	4.31e-06	0.43
Self Report	Moderate-to-Vigorous PA	WHR	rs10145335	14	98547748	G	A	377234	0.749	-0.014	0.003	8.2e-05	<0.001	144557	0.8	-0.002	0.005	1.26e-06	0.67
Self Report	Moderate-to-Vigorous PA	WHR	rs10263128	7	50233535	C	T	377234	0.412	-0.014	0.002	0.000102	<0.001	144597	0.417	0.001	0.004	2.47e-07	0.85
Self Report	Moderate-to-Vigorous PA	WHR	rs1043595	7	128410012	G	A	377234	0.717	0.014	0.002	9.15e-05	<0.001	144195	0.833	0.003	0.005	2.12e-06	0.58
Self Report	Moderate-to-Vigorous PA	WHR	rs10506671	12	75522128	G	A	377234	0.911	-0.019	0.004	6.55e-05	<0.001	144583	0.908	-0.001	0.007	6.98e-08	0.92
Self Report	Moderate-to-Vigorous PA	WHR	rs10973183	9	37066231	T	C	377234	0.462	0.013	0.002	9.06e-05	<0.001	144573	0.442	0.002	0.004	1.7e-06	0.62
Self Report	Moderate-to-Vigorous PA	WHR	rs11048486	12	26524796	C	A	377234	0.835	0.014	0.003	5.73e-05	<0.001	116782	0.983	0.02	0.017	1.18e-05	0.24
Self Report	Moderate-to-Vigorous PA	WHR	rs11081859	18	31926289	G	A	377234	0.108	0.018	0.004	7.15e-05	<0.001	132849	0.108	0	0.006	2.96e-08	0.95
Self Report	Moderate-to-Vigorous PA	WHR	rs11191275	10	104142800	C	T	377234	0.866	-0.015	0.003	6.02e-05	<0.001	134674	0.842	-0.011	0.006	2.26e-05	0.081
Self Report	Moderate-to-Vigorous PA	WHR	rs11628318	14	103040087	T	A	377234	0.25	-0.012	0.003	6.11e-05	<0.001	144386	0.217	0.012	0.005	4.27e-05	0.013
Self Report	Moderate-to-Vigorous PA	WHR	rs1186721	7	34974602	G	A	377234	0.684	-0.013	0.002	7.95e-05	<0.001	144592	0.725	0.003	0.004	2.47e-06	0.55
Self Report	Moderate-to-Vigorous PA	WHR	rs12912808	15	95292223	C	T	377234	0.851	0.018	0.003	8.44e-05	<0.001	144344	0.867	-0.003	0.006	1.1e-06	0.69
Self Report	Moderate-to-Vigorous PA	WHR	rs1296135	5	154922981	G	T	377234	0.068	-0.023	0.004	7.29e-05	<0.001	132820	0.067	-0.014	0.009	1.82e-05	0.12
Self Report	Moderate-to-Vigorous PA	WHR	rs12979056	19	17862131	G	A	377234	0.542	-0.01	0.002	5.93e-05	<0.001	144384	0.467	-0.001	0.004	2.15e-07	0.86
Self Report	Moderate-to-Vigorous PA	WHR	rs13252533	8	104814032	A	G	377234	0.805	0.015	0.003	7.87e-05	<0.001	144530	0.783	0.003	0.005	2.01e-06	0.59
Self Report	Moderate-to-Vigorous PA	WHR	rs1340704	13	76506657	C	T	377234	0.402	0.01	0.002	5.56e-05	<0.001	144349	0.475	0.001	0.004	1.33e-07	0.89
Self Report	Moderate-to-Vigorous PA	WHR	rs1363060	2	54284584	G	A	377234	0.894	-0.019	0.004	7.2e-05	<0.001	144567	0.85	0.004	0.006	3.15e-06	0.5
Self Report	Moderate-to-Vigorous PA	WHR	rs1443918	13	54034124	A	T	377234	0.382	-0.013	0.002	8.31e-05	<0.001	144250	0.433	-0.002	0.004	1.61e-06	0.63
Self Report	Moderate-to-Vigorous PA	WHR	rs17053454	13	57281368	G	A	377234	0.66	0.011	0.002	5.66e-05	<0.001	142195	0.708	0.001	0.004	2.87e-07	0.84
Self Report	Moderate-to-Vigorous PA	WHR	rs17151994	7	8633992	G	A	377234	0.738	0.014	0.003	7.63e-05	<0.001	144538	0.758	0	0.005	9.79e-09	0.97
Self Report	Moderate-to-Vigorous PA	WHR	rs17183317	4	171734020	A	G	377234	0.937	-0.022	0.005	5.97e-05	<0.001	131598	0.925	0.001	0.009	2.99e-08	0.95
Self Report	Moderate-to-Vigorous PA	WHR	rs1731951	7	137075847	T	A	377234	0.556	-0.01	0.002	5.62e-05	<0.001	144395	0.517	0.002	0.004	1.51e-06	0.64
Self Report	Moderate-to-Vigorous PA	WHR	rs17573850	13	44885589	A	G	377234	0.741	0.012	0.003	6.08e-05	<0.001	144581	0.725	-0.008	0.005	2.01e-05	0.088
Self Report	Moderate-to-Vigorous PA	WHR	rs17818431	22	20052420	G	A	377234	0.839	0.015	0.003	6.47e-05	<0.001	144622	0.825	-0.006	0.006	6.84e-06	0.32
Self Report	Moderate-to-Vigorous PA	WHR	rs1857707	5	18277597	C	A	377234	0.855	-0.015	0.003	5.7e-05	<0.001	144495	0.808	-0.007	0.006	1.09e-05	0.21
Self Report	Moderate-to-Vigorous PA	WHR	rs1921981	21	42422547	G	A	377234	0.674	0.013	0.002	8.03e-05	<0.001	144325	0.708	-0.011	0.005	3.69e-05	0.021
Self Report	Moderate-to-Vigorous PA	WHR	rs1955896	14	99197274	A	G	377234	0.538	-0.01	0.002	5.67e-05	<0.001	144403	0.583	0.007	0.004	1.77e-05	0.11
Self Report	Moderate-to-Vigorous PA	WHR	rs2035562	3	85056521	A	G	377234	0.328	-0.014	0.002	9.2e-05	<0.001	144408	0.3	0.001	0.004	4.44e-07	0.8
Self Report	Moderate-to-Vigorous PA	WHR	rs2148201	10	2323505	G	A	377234	0.509	-0.011	0.002	6.08e-05	<0.001	144170	0.475	-0.008	0.004	2.28e-05	0.07
Self Report	Moderate-to-Vigorous PA	WHR	rs2240883	16	3645909	G	C	377234	0.987	-0.045	0.01	5.54e-05	<0.001	160153	0.983	0	0.017	9.81e-10	0.99
Self Report	Moderate-to-Vigorous PA	WHR	rs2267443	22	42287454	A	G	377234	0.381	0.011	0.002	5.73e-05	<0.001	144252	0.425	-0.002	0.004	1.18e-06	0.68
Self Report	Moderate-to-Vigorous PA	WHR	rs2267549	12	4771682	G	A	377234	0.546	0.011	0.002	5.83e-05	<0.001	143861	0.567	-0.005	0.004	8.82e-06	0.26
Self Report	Moderate-to-Vigorous PA	WHR	rs2283249	11	17824372	T	G	377234	0.752	-0.013	0.003	6.3e-05	<0.001	144533	0.742	0.003	0.005	2.47e-06	0.55
Self Report	Moderate-to-Vigorous PA	WHR	rs2388195	6	98283960	A	C	377234	0.561	-0.012	0.002	7.26e-05	<0.001	144362	0.642	0.002	0.004	8.9e-07	0.72
Self Report	Moderate-to-Vigorous PA	WHR	rs2638463	12	89669785	G	A	377234	0.694	-0.012	0.003	5.57e-05	<0.001	144402	0.708	0.005	0.005	7.44e-06	0.3
Self Report	Moderate-to-Vigorous PA	WHR	rs2710477	2	210508116	T	A	377234	0.919	-0.021	0.004	6.89e-05	<0.001	144485	0.917	-0.004	0.008	2.01e-06	0.59
Self Report	Moderate-to-Vigorous PA	WHR	rs2721937	8	116633699	C	T	377234	0.815	-0.014	0.003	6.18e-05	<0.001	143819	0.817	-0.004	0.005	3.16e-06	0.5
Self Report	Moderate-to-Vigorous PA	WHR	rs293566	20	31097877	T	C	377234	0.669	-0.011	0.002	5.86e-05	<0.001	144476	0.75	-0.013	0.004	5.53e-05	0.0047
Self Report	Moderate-to-Vigorous PA	WHR	rs2942127	1	204420067	G	A	377234	0.175	0.016	0.003	8.1e-05	<0.001	144591	0.195	-0.003	0.005	2.73e-06	0.53
Self Report	Moderate-to-Vigorous PA	WHR	rs3774614	3	53841464	C	T	377234	0.459	0.011	0.002	6.92e-05	<0.001	144219	0.442	-0.006	0.004	1.44e-05	0.15
Self Report	Moderate-to-Vigorous PA	WHR	rs3936938	1	181031797	G	A	377234	0.403	-0.011	0.002	6.11e-05	<0.001	142320	0.39	-0.009	0.004	2.8e-05	0.046
Self Report	Moderate-to-Vigorous PA	WHR	rs4281659	15	61844443	T	C	377234	0.865	0.017	0.003	7.53e-05	<0.001	132851	0.908	-0.007	0.006	9.96e-06	0.25
Self Report	Moderate-to-Vigorous PA	WHR	rs4375758	18	49587092	G	A	377234	0.875	0.016	0.003	5.86e-05	<0.001	144464	0.883	0.001	0.006	2.15e-07	0.86
Self Report	Moderate-to-Vigorous PA	WHR	rs4518438	5	88157552	T	C	377234	0.49	-0.011	0.002	6.97e-05	<0.001	144538	0.525	-0.003	0.004	4.31e-06	0.43
Self Report	Moderate-to-Vigorous PA	WHR	rs4621354	3	173588268	C	T	377234	0.842	-0.014	0.003	5.55e-05	<0.001	144595	0.833	0.005	0.006	4.9e-06	0.4
Self Report	Moderate-to-Vigorous PA	WHR	rs466727	20	15626740	G	C	377234	0.329	0.011	0.002	5.77e-05	<0.001	144377	0.367	0.005	0.004	8.79e-06	0.26
Self Report	Moderate-to-Vigorous PA	WHR	rs4787924	16	24264538	G	A	377234	0.475	-0.011	0.002	6.41e-05	<0.001	144590	0.492	-0.002	0.004	1.42e-06	0.65
Self Report	Moderate-to-Vigorous PA	WHR	rs4886868	15	74353561	T	G	377234	0.414	-0.012	0.002	8.07e-05	<0.001	131818	0.25	0.008	0.005	2.27e-05	0.084
Self Report	Moderate-to-Vigorous PA	WHR	rs4947350	6	32767620	T	C	377234	0.8	0.017	0.003	0.000105	<0.001	143180	0.808	0.008	0.005	1.78e-05	0.11
Self Report	Moderate-to-Vigorous PA	WHR	rs526852	11	65891432	G	A	377234	0.421	-0.012	0.002	7.76e-05	<0.001	144590	0.408	0.003	0.004	2.6e-06	0.54
Self Report	Moderate-to-Vigorous PA	WHR	rs5755125	22	34993396	C	G	377234	0.216	0.013	0.003	6.48e-05	<0.001	144563	0.233	0	0.005	3.92e-08	0.94
Self Report	Moderate-to-Vigorous PA	WHR	rs662638	11	57686764	T	C	377234	0.444	0.012	0.002	7.4e-05	<0.001	144592	0.45	-0.001	0.004	4.91e-07	0.79
Self Report	Moderate-to-Vigorous PA	WHR	rs6743932	2	35005351	G	A	377234	0.803	-0.013	0.003	5.62e-05	<0.001	144457	0.858	0.005	0.005	6.05e-06	0.35
Self Report	Moderate-to-Vigorous PA	WHR	rs6812265	4	139726791	C	T	377234	0.548	0.011	0.002	6.92e-05	<0.001	144582	0.533	0.006	0.004	1.24e-05	0.18
Self Report	Moderate-to-Vigorous PA	WHR	rs6819429	4	159861907	T	C	377234	0.341	0.013	0.002	8.03e-05	<0.001	144580	0.333	-0.005	0.004	7.13e-06	0.31
Self Report	Moderate-to-Vigorous PA	WHR	rs710187	22	38204089	C	T	377234	0.442	0.01	0.002	5.95e-05	<0.001	144633	0.467	0.003	0.004	3.77e-06	0.46
Self Report	Moderate-to-Vigorous PA	WHR	rs7188855	16	52469602	A	T	377234	0.556	0.012	0.002	7.2e-05	<0.001	144589	0.517	-0.008	0.004	2.21e-05	0.074
Self Report	Moderate-to-Vigorous PA	WHR	rs719263	22	49685455	T	C	377234	0.195	-0.013	0.003	5.83e-05	<0.001	144630	0.192	0.003	0.005	2.6e-06	0.54
Self Report	Moderate-to-Vigorous PA	WHR	rs7233752	18	67399208	A	G	377234	0.805	0.013	0.003	5.67e-05	<0.001	144353	0.792	0	0.005	2.72e-08	0.95
Self Report	Moderate-to-Vigorous PA	WHR	rs7508365	19	13151477	T	C	377234	0.28	-0.011	0.002	5.7e-05	<0.001	121964	0.242	-0.002	0.005	7.01e-07	0.77
Self Report	Moderate-to-Vigorous PA	WHR	rs7521047	1	154076366	T	C	377234	0.46	0.012	0.002	7.59e-05	<0.001	212120	0.405	0.002	0.003	1.03e-06	0.64
Self Report	Moderate-to-Vigorous PA	WHR	rs7648547	3	41188000	A	C	377234	0.461	-0.012	0.002	7.55e-05	<0.001	143615	0.55	0.008	0.004	1.91e-05	0.098
Self Report	Moderate-to-Vigorous PA	WHR	rs7652008	3	127160434	T	C	377234	0.537	-0.011	0.002	6.11e-05	<0.001	144507	0.592	-0.001	0.004	6.46e-07	0.76
Self Report	Moderate-to-Vigorous PA	WHR	rs768023	6	108876002	G	A	377234	0.373	0.011	0.002	6.43e-05	<0.001	212126	0.425	-0.012	0.003	5.75e-05	<0.001
Self Report	Moderate-to-Vigorous PA	WHR	rs7690846	4	113988045	T	C	377234	0.484	0.01	0.002	5.84e-05	<0.001	143124	0.483	0.005	0.004	1.01e-05	0.23
Self Report	Moderate-to-Vigorous PA	WHR	rs7760670	6	73190006	C	T	377234	0.704	0.013	0.002	7.23e-05	<0.001	144565	0.717	0.002	0.004	1.18e-06	0.68
Self Report	Moderate-to-Vigorous PA	WHR	rs7804463	7	133447651	T	C	377234	0.53	0.015	0.002	0.000122	<0.001	144497	0.508	0.002	0.004	8.89e-07	0.72
Self Report	Moderate-to-Vigorous PA	WHR	rs8019978	14	55557284	G	A	377234	0.558	0.01	0.002	5.61e-05	<0.001	144364	0.508	0.004	0.004	7.76e-06	0.29
Self Report	Moderate-to-Vigorous PA	WHR	rs8058726	16	83207316	A	T	377234	0.712	-0.011	0.002	5.84e-05	<0.001	143127	0.617	0	0.005	2.75e-08	0.95
Self Report	Moderate-to-Vigorous PA	WHR	rs868866	1	151761804	A	G	377234	0.501	-0.011	0.002	6.49e-05	<0.001	144535	0.5	0.003	0.004	3e-06	0.51
Self Report	Moderate-to-Vigorous PA	WHR	rs9513912	13	102187073	A	G	377234	0.962	-0.027	0.006	5.61e-05	<0.001	129517	0.975	-0.004	0.011	9.92e-07	0.72
Self Report	Moderate-to-Vigorous PA	WHR	rs9584870	13	99245866	T	C	377234	0.633	-0.011	0.002	5.9e-05	<0.001	144323	0.692	0.008	0.005	1.92e-05	0.096
Self Report	Moderate-to-Vigorous PA	WHR	rs974471	14	29685328	G	A	377234	0.229	0.014	0.003	7.13e-05	<0.001	144588	0.208	-0.013	0.005	4.86e-05	0.008
Self Report	Moderate-to-Vigorous PA	WHR	rs9919769	12	126827971	A	G	377234	0.774	-0.012	0.003	5.88e-05	<0.001	144586	0.775	0	0.005	2.72e-08	0.95
Self Report	Moderate-to-Vigorous PA	WHR	rs997467	2	199182704	T	C	377234	0.428	-0.012	0.002	7.08e-05	<0.001	144539	0.45	0	0.004	8.84e-08	0.91
Self Report	Vigorous PA	WHR	rs10828266	10	22098701	A	G	261055	0.285	-0.007	0.001	5.71e-05	<0.001	132843	0.258	0.008	0.005	2.29e-05	0.081
Self Report	Vigorous PA	WHR	rs11153258	6	111222552	C	T	261055	0.801	-0.008	0.002	5.64e-05	<0.001	134565	0.85	-0.002	0.005	1.03e-06	0.71
Self Report	Vigorous PA	WHR	rs11643648	16	78514583	C	T	261055	0.926	-0.012	0.003	6.11e-05	<0.001	139991	0.95	0.005	0.008	3.1e-06	0.51
Self Report	Vigorous PA	WHR	rs12059540	1	154845256	T	G	261055	0.971	-0.019	0.004	6.22e-05	<0.001	139471	0.974	0.018	0.013	1.42e-05	0.16
Self Report	Vigorous PA	WHR	rs12480549	20	14148547	G	A	261055	0.806	-0.008	0.002	5.73e-05	<0.001	144382	0.808	-0.003	0.005	2.12e-06	0.58
Self Report	Vigorous PA	WHR	rs1248860	3	85015779	G	A	261055	0.484	-0.01	0.001	0.000146	<0.001	144573	0.408	0.003	0.004	3.3e-06	0.49
Self Report	Vigorous PA	WHR	rs12612409	2	69941287	C	T	261055	0.911	-0.011	0.002	6.14e-05	<0.001	144418	0.833	-0.007	0.007	6.05e-06	0.35
Self Report	Vigorous PA	WHR	rs13118259	4	139038611	G	C	261055	0.085	0.011	0.002	5.97e-05	<0.001	144581	0.083	0.007	0.008	5.11e-06	0.39
Self Report	Vigorous PA	WHR	rs13174601	5	51238100	T	C	261055	0.93	-0.013	0.003	6.18e-05	<0.001	87534	0.958	0.005	0.021	7.33e-07	0.8
Self Report	Vigorous PA	WHR	rs13243553	7	133506955	G	A	261055	0.608	0.009	0.001	0.000112	<0.001	144546	0.525	-0.002	0.004	1.1e-06	0.69
Self Report	Vigorous PA	WHR	rs13252533	8	104814032	A	G	261055	0.806	0.008	0.002	5.67e-05	<0.001	144530	0.783	0.003	0.005	2.01e-06	0.59
Self Report	Vigorous PA	WHR	rs13375273	1	181819083	G	A	261055	0.677	-0.007	0.001	5.95e-05	<0.001	144137	NA	-0.004	0.004	4.32e-06	0.43
Self Report	Vigorous PA	WHR	rs17219084	16	53855600	A	G	261055	0.624	-0.006	0.001	5.76e-05	<0.001	211720	0.625	0.004	0.004	4.48e-06	0.33
Self Report	Vigorous PA	WHR	rs17597778	4	162902865	T	G	261055	0.888	0.01	0.002	5.73e-05	<0.001	144552	0.917	-0.013	0.007	2.34e-05	0.066
Self Report	Vigorous PA	WHR	rs1774859	1	117872697	C	T	261055	0.635	-0.006	0.001	5.9e-05	<0.001	104209	0.69	0.008	0.005	2.45e-05	0.11
Self Report	Vigorous PA	WHR	rs1857707	5	18277597	C	A	261055	0.855	-0.009	0.002	5.67e-05	<0.001	144495	0.808	-0.007	0.006	1.09e-05	0.21
Self Report	Vigorous PA	WHR	rs2189464	7	8633758	C	T	261055	0.752	0.008	0.002	6.65e-05	<0.001	144506	0.758	0.001	0.005	1.09e-07	0.9
Self Report	Vigorous PA	WHR	rs2253310	6	108888593	C	G	261055	0.374	0.009	0.001	0.000113	<0.001	144542	0.425	-0.008	0.004	2.32e-05	0.067
Self Report	Vigorous PA	WHR	rs2663648	2	210491839	C	T	261055	0.884	-0.011	0.002	7.17e-05	<0.001	144560	0.875	-0.005	0.007	4.12e-06	0.44
Self Report	Vigorous PA	WHR	rs2922754	2	225909316	G	A	261055	0.242	0.007	0.002	5.95e-05	<0.001	144561	0.183	-0.002	0.005	1.42e-06	0.65
Self Report	Vigorous PA	WHR	rs328902	7	35020843	C	T	261055	0.685	-0.009	0.001	0.000102	<0.001	144592	0.725	0.004	0.004	4.12e-06	0.44
Self Report	Vigorous PA	WHR	rs336604	3	18620284	A	T	261055	0.301	0.007	0.001	6.05e-05	<0.001	144585	0.383	-0.007	0.004	1.51e-05	0.14
Self Report	Vigorous PA	WHR	rs3781411	10	126715436	C	T	261055	0.876	0.013	0.002	0.000105	<0.001	212075	0.858	0.008	0.005	1.28e-05	0.1
Self Report	Vigorous PA	WHR	rs4375758	18	49587092	G	A	261055	0.875	0.01	0.002	7.17e-05	<0.001	144464	0.883	0.001	0.006	2.15e-07	0.86
Self Report	Vigorous PA	WHR	rs4556111	8	113382838	T	C	261055	0.466	-0.007	0.001	7.15e-05	<0.001	144555	0.483	-0.001	0.004	6.46e-07	0.76
Self Report	Vigorous PA	WHR	rs526852	11	65891432	G	A	261055	0.422	-0.007	0.001	6.38e-05	<0.001	144590	0.408	0.003	0.004	2.6e-06	0.54
Self Report	Vigorous PA	WHR	rs5742915	15	74336633	T	C	261055	0.539	-0.007	0.001	6.68e-05	<0.001	212094	0.45	0.006	0.003	1.45e-05	0.08
Self Report	Vigorous PA	WHR	rs577525	10	99769388	T	C	261055	0.437	0.006	0.001	6e-05	<0.001	144579	0.425	-0.006	0.004	1.43e-05	0.15
Self Report	Vigorous PA	WHR	rs608410	1	88770663	T	C	261055	0.275	0.007	0.001	6.26e-05	<0.001	144572	0.208	-0.006	0.005	1.14e-05	0.2
Self Report	Vigorous PA	WHR	rs6562062	13	60503637	G	A	261055	0.372	-0.006	0.001	5.76e-05	<0.001	104196	0.302	0.006	0.005	1.17e-05	0.27
Self Report	Vigorous PA	WHR	rs6689056	1	24364531	G	A	261055	0.674	0.008	0.001	7.75e-05	<0.001	143462	0.603	0.006	0.005	1.05e-05	0.22
Self Report	Vigorous PA	WHR	rs6912002	6	32765268	T	C	261055	0.673	0.008	0.001	8.47e-05	<0.001	210754	0.733	0.004	0.004	5.54e-06	0.28
Self Report	Vigorous PA	WHR	rs7160630	14	98637479	A	G	261055	0.792	-0.009	0.002	7.55e-05	<0.001	144593	0.783	-0.005	0.005	6.84e-06	0.32
Self Report	Vigorous PA	WHR	rs7521837	1	154252860	T	C	261055	0.749	0.009	0.002	8.67e-05	<0.001	144591	0.758	0.002	0.005	1.18e-06	0.68
Self Report	Vigorous PA	WHR	rs7715147	5	60053220	C	A	261055	0.758	-0.007	0.002	5.57e-05	<0.001	122618	0.775	-0.001	0.006	3.76e-07	0.83
Self Report	Vigorous PA	WHR	rs7749938	6	10362511	C	T	261055	0.985	0.026	0.006	5.83e-05	<0.001	116165	0.975	0.007	0.019	1.03e-06	0.73
Self Report	Vigorous PA	WHR	rs8142972	22	41084530	T	C	261055	0.859	-0.01	0.002	6.78e-05	<0.001	144650	0.842	0.011	0.006	2.3e-05	0.068
Self Report	Vigorous PA	WHR	rs920447	11	116108902	G	A	261055	0.814	0.009	0.002	6.82e-05	<0.001	132795	0.817	-0.004	0.006	3.76e-06	0.48
Self Report	Vigorous PA	WHR	rs9324424	8	136900266	G	A	261055	0.741	0.007	0.001	6.35e-05	<0.001	144573	0.733	-0.007	0.005	1.77e-05	0.11
Self Report	Vigorous PA	WHR	rs9387216	6	97729953	C	A	261055	0.748	-0.008	0.002	7.17e-05	<0.001	144404	0.758	0.003	0.005	3.01e-06	0.51
Self Report	Vigorous PA	WHR	rs974471	14	29685328	G	A	261055	0.228	0.007	0.002	5.62e-05	<0.001	144588	0.208	-0.013	0.005	4.86e-05	0.008
Self Report	Strenuous Sports & Other Exercises	WHR	rs1007966	9	92213967	G	A	350492	0.493	0.005	0.001	6.02e-05	<0.001	144549	0.492	-0.008	0.004	2.83e-05	0.043
Self Report	Strenuous Sports & Other Exercises	WHR	rs10225928	7	85802734	A	G	350492	0.199	0.007	0.001	6e-05	<0.001	144456	0.2	-0.005	0.005	7.44e-06	0.3
Self Report	Strenuous Sports & Other Exercises	WHR	rs10821729	10	62099173	C	T	350492	0.49	-0.005	0.001	5.68e-05	<0.001	144427	0.508	0.004	0.004	8.08e-06	0.28
Self Report	Strenuous Sports & Other Exercises	WHR	rs10879547	12	73497463	C	T	350492	0.756	-0.006	0.001	5.7e-05	<0.001	144520	0.7	-0.001	0.005	5.92e-07	0.77
Self Report	Strenuous Sports & Other Exercises	WHR	rs10946808	6	26233387	A	G	350492	0.727	-0.008	0.001	9.91e-05	<0.001	212155	0.717	0	0.004	1.19e-08	0.96
Self Report	Strenuous Sports & Other Exercises	WHR	rs11210230	1	73860239	T	C	350492	0.881	-0.009	0.002	7.4e-05	<0.001	144587	0.85	-0.005	0.006	3.78e-06	0.46
Self Report	Strenuous Sports & Other Exercises	WHR	rs11625806	14	37022739	G	A	350492	0.592	-0.006	0.001	6.55e-05	<0.001	144591	0.625	-0.003	0.004	3.78e-06	0.46
Self Report	Strenuous Sports & Other Exercises	WHR	rs11934368	4	178899883	A	C	350492	0.728	0.006	0.001	5.86e-05	<0.001	144513	0.817	0.005	0.005	8.08e-06	0.28
Self Report	Strenuous Sports & Other Exercises	WHR	rs12031924	1	96877405	C	T	350492	0.76	0.006	0.001	6.35e-05	<0.001	144575	0.758	-0.005	0.005	7.43e-06	0.3
Self Report	Strenuous Sports & Other Exercises	WHR	rs12372334	12	23727824	A	T	350492	0.618	-0.005	0.001	5.71e-05	<0.001	144339	0.533	0	0.004	0	1
Self Report	Strenuous Sports & Other Exercises	WHR	rs12477961	2	199495674	A	G	350492	0.418	-0.006	0.001	6.26e-05	<0.001	144563	0.358	0.004	0.004	7.13e-06	0.31
Self Report	Strenuous Sports & Other Exercises	WHR	rs1265178	6	31161229	G	A	350492	0.762	0.007	0.001	8.12e-05	<0.001	143197	0.742	0	0.005	3.96e-08	0.94
Self Report	Strenuous Sports & Other Exercises	WHR	rs12821008	12	49474605	C	T	350492	0.594	-0.006	0.001	7.29e-05	<0.001	144187	0.65	-0.003	0.004	4.14e-06	0.44
Self Report	Strenuous Sports & Other Exercises	WHR	rs12973258	19	19488718	T	C	350492	0.816	0.009	0.001	9.27e-05	<0.001	79538	NA	-0.011	0.007	3.55e-05	0.093
Self Report	Strenuous Sports & Other Exercises	WHR	rs13107325	4	103188709	C	T	350492	0.925	0.011	0.002	6.92e-05	<0.001	211675	0.883	0	0.007	0	1
Self Report	Strenuous Sports & Other Exercises	WHR	rs13207819	6	97971404	G	A	350492	0.765	-0.007	0.001	6.7e-05	<0.001	144473	0.75	0.008	0.005	1.67e-05	0.12
Self Report	Strenuous Sports & Other Exercises	WHR	rs13270385	8	105164753	T	C	350492	0.697	-0.006	0.001	5.68e-05	<0.001	144566	0.758	-0.002	0.005	1.8e-06	0.61
Self Report	Strenuous Sports & Other Exercises	WHR	rs13284832	9	128435126	A	C	350492	0.571	-0.005	0.001	6e-05	<0.001	144379	0.592	-0.005	0.004	8.43e-06	0.27
Self Report	Strenuous Sports & Other Exercises	WHR	rs1362910	8	30856464	A	G	350492	0.42	-0.006	0.001	6.45e-05	<0.001	182935	0.367	0.008	0.004	2.43e-05	0.035
Self Report	Strenuous Sports & Other Exercises	WHR	rs1415035	6	69730452	C	T	350492	0.836	0.008	0.002	6.85e-05	<0.001	144297	0.908	-0.002	0.006	4.92e-07	0.79
Self Report	Strenuous Sports & Other Exercises	WHR	rs1477117	12	109888779	G	A	350492	0.811	0.007	0.001	6.02e-05	<0.001	212162	0.817	-0.001	0.004	1.92e-07	0.84
Self Report	Strenuous Sports & Other Exercises	WHR	rs1625595	11	66078129	C	T	350492	0.532	0.006	0.001	7.4e-05	<0.001	144518	0.475	-0.011	0.004	4.27e-05	0.013
Self Report	Strenuous Sports & Other Exercises	WHR	rs1638525	17	19848594	G	C	350492	0.603	0.008	0.001	0.000114	<0.001	144595	0.592	0.005	0.004	1.04e-05	0.22
Self Report	Strenuous Sports & Other Exercises	WHR	rs17062635	5	163375485	G	A	350492	0.546	-0.006	0.001	6.5e-05	<0.001	144423	0.542	-0.004	0.004	7.75e-06	0.29
Self Report	Strenuous Sports & Other Exercises	WHR	rs17145573	11	56969455	G	A	350492	0.89	-0.009	0.002	6.54e-05	<0.001	144399	0.842	-0.001	0.007	2.48e-07	0.85
Self Report	Strenuous Sports & Other Exercises	WHR	rs173946	5	60488297	T	C	350492	0.605	-0.007	0.001	9.73e-05	<0.001	144595	0.617	0.001	0.004	1.85e-07	0.87
Self Report	Strenuous Sports & Other Exercises	WHR	rs17565975	11	111586950	G	A	350492	0.437	0.005	0.001	5.77e-05	<0.001	144299	0.533	0.011	0.004	4.61e-05	0.0099
Self Report	Strenuous Sports & Other Exercises	WHR	rs1788826	18	21154024	G	A	350492	0.347	-0.006	0.001	6.49e-05	<0.001	144580	0.333	0.006	0.004	1.37e-05	0.16
Self Report	Strenuous Sports & Other Exercises	WHR	rs1932202	9	75970379	C	T	350492	0.752	0.007	0.001	6.86e-05	<0.001	141255	0.667	-0.004	0.005	4.81e-06	0.41
Self Report	Strenuous Sports & Other Exercises	WHR	rs2148201	10	2323505	G	A	350492	0.508	-0.006	0.001	6.81e-05	<0.001	144170	0.475	-0.008	0.004	2.28e-05	0.07
Self Report	Strenuous Sports & Other Exercises	WHR	rs2156044	18	33388938	G	C	350492	0.656	-0.006	0.001	5.79e-05	<0.001	144343	0.667	0.002	0.004	1.26e-06	0.67
Self Report	Strenuous Sports & Other Exercises	WHR	rs2238046	12	2299998	A	C	350492	0.612	-0.006	0.001	6.5e-05	<0.001	144543	0.592	-0.003	0.004	2.86e-06	0.52
Self Report	Strenuous Sports & Other Exercises	WHR	rs2271271	10	75558867	G	A	350492	0.28	0.006	0.001	6.9e-05	<0.001	144564	0.275	-0.007	0.005	1.37e-05	0.16
Self Report	Strenuous Sports & Other Exercises	WHR	rs2278480	3	25635743	T	C	350492	0.713	-0.006	0.001	5.71e-05	<0.001	143955	0.658	0.009	0.005	2.6e-05	0.053
Self Report	Strenuous Sports & Other Exercises	WHR	rs246743	7	140690009	T	G	350492	0.147	0.008	0.002	6.66e-05	<0.001	142383	0.142	0.002	0.006	5.48e-07	0.78
Self Report	Strenuous Sports & Other Exercises	WHR	rs2470893	15	75019449	C	T	350492	0.67	0.006	0.001	7.84e-05	<0.001	209762	0.725	-0.009	0.004	2.77e-05	0.016
Self Report	Strenuous Sports & Other Exercises	WHR	rs2668196	3	165502709	A	T	350492	0.192	-0.007	0.001	6.4e-05	<0.001	142226	0.192	0.003	0.005	1.63e-06	0.63
Self Report	Strenuous Sports & Other Exercises	WHR	rs2821549	1	111184045	G	C	350492	0.721	0.006	0.001	6.26e-05	<0.001	143996	0.725	-0.007	0.005	1.37e-05	0.16
Self Report	Strenuous Sports & Other Exercises	WHR	rs2871340	2	100884117	G	T	350492	0.503	-0.006	0.001	7.48e-05	<0.001	144328	0.525	0.005	0.004	8.43e-06	0.27
Self Report	Strenuous Sports & Other Exercises	WHR	rs288071	2	210408416	A	G	350492	0.902	-0.011	0.002	8.36e-05	<0.001	144535	0.875	-0.004	0.007	3e-06	0.51
Self Report	Strenuous Sports & Other Exercises	WHR	rs3129334	4	3368526	T	C	350492	0.403	0.006	0.001	7.44e-05	<0.001	144584	0.367	-0.008	0.004	2.63e-05	0.051
Self Report	Strenuous Sports & Other Exercises	WHR	rs354364	6	66304163	T	C	350492	0.75	-0.006	0.001	5.57e-05	<0.001	144533	0.733	-0.001	0.005	5.91e-07	0.77
Self Report	Strenuous Sports & Other Exercises	WHR	rs3733876	5	176382995	G	A	350492	0.814	0.007	0.001	6.54e-05	<0.001	212177	0.8	-0.007	0.004	1.14e-05	0.12
Self Report	Strenuous Sports & Other Exercises	WHR	rs3771544	2	69771484	C	T	350492	0.608	-0.006	0.001	6.11e-05	<0.001	144479	0.558	-0.002	0.004	1.18e-06	0.68
Self Report	Strenuous Sports & Other Exercises	WHR	rs400432	3	18623278	A	G	350492	0.301	0.006	0.001	6.83e-05	<0.001	144455	0.383	-0.006	0.004	1.43e-05	0.15
Self Report	Strenuous Sports & Other Exercises	WHR	rs4084828	2	118893347	C	T	350492	0.463	-0.006	0.001	6.76e-05	<0.001	129641	0.5	-0.006	0.005	9.79e-06	0.26
Self Report	Strenuous Sports & Other Exercises	WHR	rs4411372	13	99130423	T	C	350492	0.72	-0.007	0.001	8.36e-05	<0.001	144585	0.783	0.008	0.004	2.43e-05	0.061
Self Report	Strenuous Sports & Other Exercises	WHR	rs4432322	18	22689878	T	C	350492	0.359	-0.005	0.001	5.63e-05	<0.001	144425	0.367	0.003	0.005	2.87e-06	0.52
Self Report	Strenuous Sports & Other Exercises	WHR	rs4601350	8	113329886	C	T	350492	0.451	-0.006	0.001	6.3e-05	<0.001	144496	0.45	0.001	0.004	1.32e-07	0.89
Self Report	Strenuous Sports & Other Exercises	WHR	rs4658403	1	243832560	C	T	350492	0.166	-0.008	0.002	6.76e-05	<0.001	143662	0.161	0.004	0.006	3.02e-06	0.51
Self Report	Strenuous Sports & Other Exercises	WHR	rs4743038	9	109645987	A	T	350492	0.802	0.007	0.001	5.7e-05	<0.001	144537	0.783	0.003	0.005	1.9e-06	0.6
Self Report	Strenuous Sports & Other Exercises	WHR	rs4799	2	10933249	C	T	350492	0.521	0.006	0.001	6.77e-05	<0.001	144549	0.433	-0.002	0.004	2.6e-06	0.54
Self Report	Strenuous Sports & Other Exercises	WHR	rs4811141	20	49851464	G	A	350492	0.127	-0.008	0.002	6.57e-05	<0.001	57596	NA	0.008	0.01	1.18e-05	0.41
Self Report	Strenuous Sports & Other Exercises	WHR	rs4865667	5	50748173	C	T	350492	0.613	0.007	0.001	8.72e-05	<0.001	144585	0.567	-0.007	0.004	1.87e-05	0.1
Self Report	Strenuous Sports & Other Exercises	WHR	rs4890829	18	74540433	C	T	350492	0.362	-0.006	0.001	6.22e-05	<0.001	144544	0.367	-0.004	0.004	5.33e-06	0.38
Self Report	Strenuous Sports & Other Exercises	WHR	rs4899284	14	69650845	A	G	350492	0.355	0.007	0.001	8.58e-05	<0.001	144560	0.367	0.003	0.004	3.15e-06	0.5
Self Report	Strenuous Sports & Other Exercises	WHR	rs4900442	14	100158241	C	T	350492	0.539	-0.005	0.001	6.26e-05	<0.001	144278	0.55	-0.004	0.004	5.57e-06	0.37
Self Report	Strenuous Sports & Other Exercises	WHR	rs526231	5	102681381	C	T	350492	0.672	-0.006	0.001	5.95e-05	<0.001	144580	0.617	0.004	0.004	5.11e-06	0.39
Self Report	Strenuous Sports & Other Exercises	WHR	rs577525	10	99769388	T	C	350492	0.437	0.006	0.001	7.02e-05	<0.001	144579	0.425	-0.006	0.004	1.43e-05	0.15
Self Report	Strenuous Sports & Other Exercises	WHR	rs7002919	8	15874907	C	G	350492	0.918	-0.01	0.002	5.9e-05	<0.001	144298	0.908	-0.008	0.008	8.09e-06	0.28
Self Report	Strenuous Sports & Other Exercises	WHR	rs7031064	9	14455076	A	G	350492	0.517	-0.006	0.001	6.85e-05	<0.001	144428	0.55	0.005	0.004	1.09e-05	0.21
Self Report	Strenuous Sports & Other Exercises	WHR	rs7034243	9	122688811	A	G	350492	0.659	-0.006	0.001	7.53e-05	<0.001	144253	0.692	0.001	0.004	2.16e-07	0.86
Self Report	Strenuous Sports & Other Exercises	WHR	rs705692	1	7480217	C	T	350492	0.108	-0.009	0.002	6.59e-05	<0.001	144528	0.125	-0.002	0.007	7.03e-07	0.75
Self Report	Strenuous Sports & Other Exercises	WHR	rs7205420	16	8296948	A	T	350492	0.793	-0.007	0.001	6.3e-05	<0.001	144464	0.783	0	0.005	9.79e-09	0.97
Self Report	Strenuous Sports & Other Exercises	WHR	rs7228225	18	53529456	A	T	350492	0.415	0.005	0.001	5.86e-05	<0.001	144415	0.417	0.006	0.004	1.3e-05	0.17
Self Report	Strenuous Sports & Other Exercises	WHR	rs7588028	2	1119227	G	A	350492	0.607	0.005	0.001	5.68e-05	<0.001	144178	0.583	-0.002	0.004	2.01e-06	0.59
Self Report	Strenuous Sports & Other Exercises	WHR	rs7607737	2	183728290	C	T	350492	0.883	-0.008	0.002	5.7e-05	<0.001	144577	0.883	0.007	0.006	8.07e-06	0.28
Self Report	Strenuous Sports & Other Exercises	WHR	rs7627864	3	49926613	C	G	350492	0.569	0.007	0.001	8.86e-05	<0.001	144433	0.533	-0.004	0.004	6.3e-06	0.34
Self Report	Strenuous Sports & Other Exercises	WHR	rs763187	6	166955738	A	G	350492	0.171	-0.008	0.002	6.89e-05	<0.001	132592	0.208	0.014	0.006	3.74e-05	0.026
Self Report	Strenuous Sports & Other Exercises	WHR	rs7718022	5	147941845	G	C	350492	0.487	-0.005	0.001	5.97e-05	<0.001	143133	0.475	0.006	0.004	1.52e-05	0.14
Self Report	Strenuous Sports & Other Exercises	WHR	rs7740107	6	130374461	T	A	350492	0.264	-0.006	0.001	6.6e-05	<0.001	144562	0.25	-0.01	0.005	2.95e-05	0.039
Self Report	Strenuous Sports & Other Exercises	WHR	rs795980	4	140801666	A	G	350492	0.668	-0.006	0.001	6.35e-05	<0.001	211969	0.692	0.008	0.004	2.6e-05	0.019
Self Report	Strenuous Sports & Other Exercises	WHR	rs896302	6	98806496	C	T	350492	0.287	0.007	0.001	8.44e-05	<0.001	144573	0.342	0.006	0.005	9.97e-06	0.23
Self Report	Strenuous Sports & Other Exercises	WHR	rs9177	7	1787236	A	G	350492	0.51	0.006	0.001	6.75e-05	<0.001	135317	0.612	0.001	0.005	1.98e-07	0.87
Self Report	Strenuous Sports & Other Exercises	WHR	rs9293777	5	78661452	C	T	350492	0.653	-0.006	0.001	6.18e-05	<0.001	142116	0.675	-0.002	0.005	9.73e-07	0.71
Self Report	Strenuous Sports & Other Exercises	WHR	rs9420	11	57510294	A	G	350492	0.324	-0.006	0.001	5.7e-05	<0.001	144584	0.258	0.006	0.004	1.19e-05	0.19
Self Report	Strenuous Sports & Other Exercises	WHR	rs9563168	13	54247827	G	A	350492	0.79	-0.007	0.001	6.02e-05	<0.001	144591	0.7	0	0.005	2.72e-08	0.95
Self Report	Strenuous Sports & Other Exercises	WHR	rs9604803	22	18398207	C	A	350492	0.671	0.006	0.001	6.46e-05	<0.001	144433	0.642	0	0.004	1.74e-08	0.96
Self Report	Strenuous Sports & Other Exercises	WHR	rs968304	1	169094100	T	A	350492	0.411	-0.006	0.001	7.93e-05	<0.001	143600	0.467	0	0.004	4.38e-09	0.98
Self Report	Strenuous Sports & Other Exercises	WHR	rs9861451	3	85409353	A	G	350492	0.273	0.011	0.001	0.0002	<0.001	144584	0.333	0	0.005	9.78e-09	0.97
Self Report	Strenuous Sports & Other Exercises	WHR	rs9903845	17	50291181	C	A	350492	0.673	0.006	0.001	6.51e-05	<0.001	144500	0.642	0.002	0.005	2.01e-06	0.59
Self Report	Sedentary Behavior	WC	rs10041724	5	124273520	T	C	422218	0.808	0.018	0.003	0.000116	<0.001	153948	0.783	0.018	0.005	7.63e-05	<0.001
Self Report	Sedentary Behavior	WC	rs10145592	14	94287215	C	G	422218	0.409	-0.015	0.002	0.00012	<0.001	153906	0.408	-0.004	0.004	4.05e-06	0.43
Self Report	Sedentary Behavior	WC	rs10189857	2	60713235	A	G	422218	0.568	-0.02	0.002	0.000234	<0.001	153723	0.567	-0.001	0.004	6.6e-07	0.75
Self Report	Sedentary Behavior	WC	rs1022785	14	29571653	G	A	422218	0.142	0.018	0.003	8.89e-05	<0.001	153950	0.133	0.011	0.006	2.39e-05	0.055
Self Report	Sedentary Behavior	WC	rs10234444	7	41828527	G	A	422218	0.823	0.016	0.003	8.17e-05	<0.001	153913	0.875	0.008	0.006	1.28e-05	0.16
Self Report	Sedentary Behavior	WC	rs1031423	5	93276883	T	C	422218	0.215	-0.019	0.003	0.000132	<0.001	153845	0.2	0.001	0.006	4.17e-07	0.8
Self Report	Sedentary Behavior	WC	rs10737620	1	193057971	T	A	422218	0.274	0.014	0.002	9.41e-05	<0.001	153906	0.28	0.003	0.005	2.96e-06	0.5
Self Report	Sedentary Behavior	WC	rs10876864	12	56401085	G	A	422218	0.427	-0.013	0.002	9.91e-05	<0.001	153940	0.358	-0.003	0.004	2.56e-06	0.53
Self Report	Sedentary Behavior	WC	rs10932837	2	221044785	C	T	422218	0.494	-0.013	0.002	9.77e-05	<0.001	153928	0.508	0.003	0.004	2.56e-06	0.53
Self Report	Sedentary Behavior	WC	rs11201422	10	86924483	T	C	422218	0.669	0.013	0.002	8.09e-05	<0.001	150599	0.692	0.01	0.005	3.25e-05	0.027
Self Report	Sedentary Behavior	WC	rs11218575	11	122154576	C	T	422218	0.566	0.015	0.002	0.000131	<0.001	153592	0.558	0	0.004	8.32e-08	0.91
Self Report	Sedentary Behavior	WC	rs11245482	10	126733546	T	C	422218	0.613	-0.013	0.002	9.41e-05	<0.001	153811	0.625	-0.011	0.004	3.77e-05	0.016
Self Report	Sedentary Behavior	WC	rs11689199	2	100820421	A	G	422218	0.598	0.018	0.002	0.000186	<0.001	153908	0.642	0.008	0.004	2.05e-05	0.076
Self Report	Sedentary Behavior	WC	rs11763734	7	126400910	A	C	422218	0.51	-0.012	0.002	8.82e-05	<0.001	153947	0.533	0.001	0.004	1.24e-07	0.89
Self Report	Sedentary Behavior	WC	rs11985394	8	92667521	T	A	422218	0.545	0.012	0.002	8.58e-05	<0.001	153934	0.592	0.001	0.004	1.24e-07	0.89
Self Report	Sedentary Behavior	WC	rs12105701	2	41737200	C	T	422218	0.396	-0.013	0.002	9.03e-05	<0.001	153890	0.392	-0.01	0.004	3.52e-05	0.02
Self Report	Sedentary Behavior	WC	rs12289262	11	12894758	C	T	422218	0.731	-0.014	0.002	8.36e-05	<0.001	153907	0.658	-0.013	0.005	4.32e-05	0.0099
Self Report	Sedentary Behavior	WC	rs1243182	10	21916728	C	T	422218	0.69	-0.019	0.002	0.000167	<0.001	153942	0.717	-0.018	0.005	9.18e-05	<0.001
Self Report	Sedentary Behavior	WC	rs12491503	3	165706855	G	A	422218	0.67	-0.014	0.002	0.000102	<0.001	153911	0.625	0	0.004	4.08e-09	0.98
Self Report	Sedentary Behavior	WC	rs13029509	2	215374209	G	A	422218	0.52	-0.018	0.002	0.000191	<0.001	153811	0.558	-0.005	0.004	6.98e-06	0.3
Self Report	Sedentary Behavior	WC	rs13107325	4	103188709	C	T	422218	0.926	-0.029	0.004	0.000133	<0.001	231570	0.883	-0.023	0.007	4.21e-05	0.0018
Self Report	Sedentary Behavior	WC	rs1421334	8	30865733	A	C	422218	0.45	0.017	0.002	0.000167	<0.001	153659	0.442	0.009	0.004	2.89e-05	0.035
Self Report	Sedentary Behavior	WC	rs1563908	5	60437381	A	G	422218	0.62	0.016	0.002	0.000143	<0.001	153837	0.633	-0.001	0.004	5.56e-07	0.77
Self Report	Sedentary Behavior	WC	rs17207890	11	95490754	G	A	422218	0.657	0.016	0.002	0.000125	<0.001	151933	0.708	-0.001	0.005	2.35e-07	0.85
Self Report	Sedentary Behavior	WC	rs17379561	1	98340139	A	T	422218	0.856	-0.025	0.003	0.000183	<0.001	153813	0.883	-0.02	0.006	7.47e-05	<0.001
Self Report	Sedentary Behavior	WC	rs17568389	7	8091876	T	A	422218	0.487	0.015	0.002	0.000136	<0.001	153798	0.492	-0.004	0.004	6.17e-06	0.33
Self Report	Sedentary Behavior	WC	rs17727474	10	127182959	C	T	422218	0.832	0.018	0.003	9.32e-05	<0.001	153850	0.783	-0.003	0.006	2.1e-06	0.57
Self Report	Sedentary Behavior	WC	rs17789218	6	100600097	T	C	422218	0.756	0.019	0.003	0.000145	<0.001	232050	0.733	-0.006	0.004	1.1e-05	0.11
Self Report	Sedentary Behavior	WC	rs2045147	10	56660437	A	G	422218	0.449	0.013	0.002	8.99e-05	<0.001	153935	0.375	0.004	0.004	4.22e-06	0.42
Self Report	Sedentary Behavior	WC	rs2060199	2	166196681	T	A	422218	0.446	0.012	0.002	8.26e-05	<0.001	153898	0.492	-0.005	0.004	1.02e-05	0.21
Self Report	Sedentary Behavior	WC	rs2073869	9	135763816	C	T	422218	0.834	0.019	0.003	0.000109	<0.001	153871	0.792	0.014	0.006	4.4e-05	0.0093
Self Report	Sedentary Behavior	WC	rs2460	15	53073084	G	A	422218	0.736	-0.015	0.002	0.000103	<0.001	153741	0.742	-0.008	0.005	1.66e-05	0.11
Self Report	Sedentary Behavior	WC	rs2616830	9	1721385	G	A	422218	0.462	0.016	0.002	0.000153	<0.001	153908	0.55	0.004	0.004	6.43e-06	0.32
Self Report	Sedentary Behavior	WC	rs2787374	9	103054951	T	C	422218	0.408	0.012	0.002	8.62e-05	<0.001	153945	0.408	0.007	0.004	1.77e-05	0.099
Self Report	Sedentary Behavior	WC	rs374722	2	147839830	G	A	422218	0.15	0.024	0.003	0.000174	<0.001	153867	0.142	0.01	0.006	1.87e-05	0.09
Self Report	Sedentary Behavior	WC	rs3796386	3	49899795	G	A	422218	0.572	-0.026	0.002	0.000383	<0.001	153941	0.533	-0.002	0.004	1.89e-06	0.59
Self Report	Sedentary Behavior	WC	rs4334769	4	130245233	G	T	422218	0.474	0.012	0.002	8.33e-05	<0.001	153632	0.483	0.004	0.004	4.42e-06	0.41
Self Report	Sedentary Behavior	WC	rs4382592	9	134870755	T	G	422218	0.301	0.014	0.002	8.92e-05	<0.001	153879	0.275	0.004	0.005	5.45e-06	0.36
Self Report	Sedentary Behavior	WC	rs4435081	12	74331820	C	T	422218	0.53	0.012	0.002	8.29e-05	<0.001	153939	0.567	0	0.004	5.01e-08	0.93
Self Report	Sedentary Behavior	WC	rs4675246	2	202864487	G	T	422218	0.797	-0.015	0.003	8.17e-05	<0.001	142187	0.842	-0.004	0.006	4.19e-06	0.44
Self Report	Sedentary Behavior	WC	rs4845364	1	154141908	A	G	422218	0.495	-0.015	0.002	0.000134	<0.001	153888	0.543	-0.002	0.004	1.51e-06	0.63
Self Report	Sedentary Behavior	WC	rs4937842	11	133734542	G	C	422218	0.634	-0.013	0.002	8.54e-05	<0.001	153538	0.6	-0.004	0.004	4.81e-06	0.39
Self Report	Sedentary Behavior	WC	rs6472942	8	76827190	T	C	422218	0.568	-0.013	0.002	9.6e-05	<0.001	153868	0.5	0.01	0.004	3.64e-05	0.018
Self Report	Sedentary Behavior	WC	rs6673341	1	184655649	T	G	422218	0.465	-0.015	0.002	0.000119	<0.001	153490	0.492	-0.001	0.004	4.18e-07	0.8
Self Report	Sedentary Behavior	WC	rs6754968	2	105414479	G	A	422218	0.653	-0.014	0.002	0.000104	<0.001	153891	0.717	-0.007	0.004	1.42e-05	0.14
Self Report	Sedentary Behavior	WC	rs6825241	4	152543783	C	A	422218	0.536	-0.017	0.002	0.000163	<0.001	153918	0.558	-0.004	0.004	4.23e-06	0.42
Self Report	Sedentary Behavior	WC	rs6905544	6	98411631	A	G	422218	0.399	-0.019	0.002	0.000196	<0.001	153940	0.492	-0.01	0.004	3.02e-05	0.031
Self Report	Sedentary Behavior	WC	rs6973656	7	77422583	A	G	422218	0.603	-0.013	0.002	9.91e-05	<0.001	153904	0.508	-0.003	0.004	3.55e-06	0.46
Self Report	Sedentary Behavior	WC	rs6996198	8	65463442	C	T	422218	0.843	-0.016	0.003	8.07e-05	<0.001	153926	0.875	-0.006	0.006	5.91e-06	0.34
Self Report	Sedentary Behavior	WC	rs707919	6	31641139	A	G	422218	0.717	-0.014	0.002	8.44e-05	<0.001	152549	0.708	-0.001	0.005	3.02e-07	0.83
Self Report	Sedentary Behavior	WC	rs7089973	10	116569565	C	A	422218	0.619	-0.013	0.002	9.45e-05	<0.001	144357	0.617	-0.004	0.005	6.31e-06	0.34
Self Report	Sedentary Behavior	WC	rs7564130	2	50606642	T	C	422218	0.641	-0.015	0.002	0.000118	<0.001	153930	0.583	0.004	0.004	4.8e-06	0.39
Self Report	Sedentary Behavior	WC	rs7693703	4	118357405	G	A	422218	0.91	0.023	0.004	9.39e-05	<0.001	153927	0.95	0.009	0.007	1.07e-05	0.2
Self Report	Sedentary Behavior	WC	rs7700107	4	17880416	A	C	422218	0.863	-0.021	0.003	0.00012	<0.001	153879	0.858	0.005	0.007	4.23e-06	0.42
Self Report	Sedentary Behavior	WC	rs801733	11	65934549	A	C	422218	0.641	0.017	0.002	0.000149	<0.001	196214	0.692	0.004	0.004	4.45e-06	0.35
Self Report	Sedentary Behavior	WC	rs8043253	15	41503730	C	T	422218	0.573	-0.012	0.002	8.09e-05	<0.001	151711	0.617	0.002	0.004	1.62e-06	0.62
Self Report	Sedentary Behavior	WC	rs870151	9	92230747	T	A	422218	0.528	-0.016	0.002	0.000136	<0.001	153660	0.508	0.01	0.004	3.32e-05	0.024
Self Report	Sedentary Behavior	WC	rs9326862	5	112054547	A	T	422218	0.468	0.012	0.002	8.22e-05	<0.001	153857	0.467	0.006	0.004	1.49e-05	0.13
Self Report	Sedentary Behavior	WC	rs9563168	13	54247827	G	A	422218	0.791	0.018	0.003	0.000115	<0.001	153943	0.7	0.005	0.005	5.67e-06	0.35
Self Report	Sedentary Behavior	WC	rs973734	7	89387578	C	A	422218	0.152	0.017	0.003	8.51e-05	<0.001	153906	0.125	0.007	0.006	9.77e-06	0.22
Self Report	Sedentary Behavior	WC	rs9834970	3	36856030	T	C	422218	0.501	0.013	0.002	9.29e-05	<0.001	151708	0.483	0.003	0.004	4.11e-06	0.43
Self Report	Moderate PA	WC	rs10499298	6	156134070	C	T	360912	0.866	-0.016	0.003	6.35e-05	<0.001	153937	0.883	-0.002	0.006	7.15e-07	0.74
Self Report	Moderate PA	WC	rs10733788	10	64917865	T	C	360912	0.187	0.015	0.003	6.84e-05	<0.001	142205	0.2	0.01	0.006	2.41e-05	0.064
Self Report	Moderate PA	WC	rs11210871	1	44029353	C	G	360912	0.299	0.013	0.003	7.22e-05	<0.001	153336	0.358	-0.001	0.005	3.01e-07	0.83
Self Report	Moderate PA	WC	rs1125854	7	131927170	T	C	360912	0.372	0.011	0.002	6.04e-05	<0.001	112533	0.328	0.003	0.005	3.02e-06	0.56
Self Report	Moderate PA	WC	rs1148198	10	28658275	G	A	360912	0.804	0.013	0.003	5.96e-05	<0.001	124479	0.833	0	0.007	0	1
Self Report	Moderate PA	WC	rs12515547	5	52965231	G	A	360912	0.784	0.013	0.003	5.92e-05	<0.001	153835	0.808	0.009	0.005	1.95e-05	0.083
Self Report	Moderate PA	WC	rs1362735	7	133398605	A	G	360912	0.654	0.011	0.002	6.12e-05	<0.001	151736	0.675	-0.003	0.004	3.6e-06	0.46
Self Report	Moderate PA	WC	rs17473484	5	114915460	T	C	360912	0.951	0.026	0.005	6.49e-05	<0.001	142046	0.917	-0.011	0.011	8.22e-06	0.28
Self Report	Moderate PA	WC	rs1941599	11	76433754	A	G	360912	0.696	0.013	0.003	6.78e-05	<0.001	142799	0.683	0.002	0.006	9e-07	0.72
Self Report	Moderate PA	WC	rs2041786	16	50539323	A	G	360912	0.844	0.015	0.003	6.49e-05	<0.001	153945	0.917	0.006	0.006	7.27e-06	0.29
Self Report	Moderate PA	WC	rs4556752	15	37940886	C	T	360912	0.921	-0.02	0.004	6.23e-05	<0.001	125792	0.933	0.01	0.01	7.86e-06	0.32
Self Report	Moderate PA	WC	rs4895842	6	129349539	T	C	360912	0.315	-0.011	0.002	5.96e-05	<0.001	153944	0.317	-0.01	0.005	2.89e-05	0.035
Self Report	Moderate PA	WC	rs6137790	20	2346200	G	A	360912	0.556	0.011	0.002	6.01e-05	<0.001	153758	0.6	0	0.004	8.31e-08	0.91
Self Report	Moderate PA	WC	rs6545389	2	54386901	A	G	360912	0.5	-0.013	0.002	8.43e-05	<0.001	153689	0.442	0.006	0.004	1.23e-05	0.17
Self Report	Moderate PA	WC	rs6950425	7	92506072	A	C	360912	0.961	-0.028	0.006	6.35e-05	<0.001	127908	0.95	-0.004	0.012	9.31e-07	0.73
Self Report	Moderate PA	WC	rs7697278	4	66243126	C	T	360912	0.43	-0.011	0.002	6.49e-05	<0.001	153779	0.467	-0.002	0.004	1.51e-06	0.63
Self Report	Moderate PA	WC	rs8070414	17	63428940	T	G	360912	0.89	0.018	0.004	6.97e-05	<0.001	153890	0.892	-0.001	0.007	5.01e-08	0.93
Self Report	Moderate PA	WC	rs918113	12	68212630	G	A	360912	0.842	0.015	0.003	6.63e-05	<0.001	153948	0.9	0.004	0.006	3.87e-06	0.44
Self Report	Moderate PA	WC	rs9570029	13	59621634	A	G	360912	0.901	-0.018	0.004	5.85e-05	<0.001	142193	0.925	-0.006	0.008	5.2e-06	0.39
Self Report	Moderate PA	WC	rs960117	12	46613819	C	T	360912	0.188	-0.014	0.003	6.58e-05	<0.001	153940	0.183	-0.01	0.006	1.98e-05	0.081
Self Report	Moderate-to-Vigorous PA	WC	rs10041140	5	51378177	A	T	377234	0.733	0.012	0.003	6.47e-05	<0.001	153954	0.758	-0.008	0.005	1.28e-05	0.16
Self Report	Moderate-to-Vigorous PA	WC	rs10145335	14	98547748	G	A	377234	0.749	-0.014	0.003	8.2e-05	<0.001	153909	0.8	-0.005	0.005	5.01e-06	0.38
Self Report	Moderate-to-Vigorous PA	WC	rs10157145	1	205261963	T	C	377234	0.496	-0.012	0.002	7.55e-05	<0.001	153717	0.464	-0.009	0.004	2.77e-05	0.039
Self Report	Moderate-to-Vigorous PA	WC	rs10263128	7	50233535	C	T	377234	0.412	-0.014	0.002	0.000102	<0.001	153949	0.417	0.005	0.004	8.6e-06	0.25
Self Report	Moderate-to-Vigorous PA	WC	rs1043595	7	128410012	G	A	377234	0.717	0.014	0.002	9.15e-05	<0.001	153547	0.833	0.014	0.005	4.36e-05	0.0097
Self Report	Moderate-to-Vigorous PA	WC	rs10506671	12	75522128	G	A	377234	0.911	-0.019	0.004	6.55e-05	<0.001	153935	0.908	-0.002	0.007	5.07e-07	0.78
Self Report	Moderate-to-Vigorous PA	WC	rs10973183	9	37066231	T	C	377234	0.462	0.013	0.002	9.06e-05	<0.001	153925	0.442	0.005	0.004	9.36e-06	0.23
Self Report	Moderate-to-Vigorous PA	WC	rs11048486	12	26524796	C	A	377234	0.835	0.014	0.003	5.73e-05	<0.001	126101	0.983	-0.003	0.017	2.47e-07	0.86
Self Report	Moderate-to-Vigorous PA	WC	rs11081859	18	31926289	G	A	377234	0.108	0.018	0.004	7.15e-05	<0.001	142200	0.108	0.005	0.007	3.84e-06	0.46
Self Report	Moderate-to-Vigorous PA	WC	rs11191275	10	104142800	C	T	377234	0.866	-0.015	0.003	6.02e-05	<0.001	144025	0.842	-0.003	0.006	1.18e-06	0.68
Self Report	Moderate-to-Vigorous PA	WC	rs11628318	14	103040087	T	A	377234	0.25	-0.012	0.003	6.11e-05	<0.001	153738	0.217	0.01	0.005	2.66e-05	0.043
Self Report	Moderate-to-Vigorous PA	WC	rs1186721	7	34974602	G	A	377234	0.684	-0.013	0.002	7.95e-05	<0.001	153944	0.725	-0.004	0.005	5.44e-06	0.36
Self Report	Moderate-to-Vigorous PA	WC	rs12912808	15	95292223	C	T	377234	0.851	0.018	0.003	8.44e-05	<0.001	153696	0.867	-0.014	0.007	2.77e-05	0.039
Self Report	Moderate-to-Vigorous PA	WC	rs1296135	5	154922981	G	T	377234	0.068	-0.023	0.004	7.29e-05	<0.001	142172	0.067	-0.016	0.009	2.07e-05	0.086
Self Report	Moderate-to-Vigorous PA	WC	rs12979056	19	17862131	G	A	377234	0.542	-0.01	0.002	5.93e-05	<0.001	153590	0.467	0.004	0.005	5.23e-06	0.37
Self Report	Moderate-to-Vigorous PA	WC	rs13252533	8	104814032	A	G	377234	0.805	0.015	0.003	7.87e-05	<0.001	153882	0.783	0.005	0.005	6.7e-06	0.31
Self Report	Moderate-to-Vigorous PA	WC	rs1340704	13	76506657	C	T	377234	0.402	0.01	0.002	5.56e-05	<0.001	153701	0.475	0.001	0.005	1.48e-07	0.88
Self Report	Moderate-to-Vigorous PA	WC	rs1363060	2	54284584	G	A	377234	0.894	-0.019	0.004	7.2e-05	<0.001	153919	0.85	0.004	0.007	2.96e-06	0.5
Self Report	Moderate-to-Vigorous PA	WC	rs1443918	13	54034124	A	T	377234	0.382	-0.013	0.002	8.31e-05	<0.001	153602	0.433	0.003	0.004	3.88e-06	0.44
Self Report	Moderate-to-Vigorous PA	WC	rs17053454	13	57281368	G	A	377234	0.66	0.011	0.002	5.66e-05	<0.001	151547	0.708	0	0.005	2.59e-08	0.95
Self Report	Moderate-to-Vigorous PA	WC	rs17151994	7	8633992	G	A	377234	0.738	0.014	0.003	7.63e-05	<0.001	153890	0.758	0.007	0.005	1.17e-05	0.18
Self Report	Moderate-to-Vigorous PA	WC	rs17183317	4	171734020	A	G	377234	0.937	-0.022	0.005	5.97e-05	<0.001	140918	0.925	-0.007	0.009	4.23e-06	0.44
Self Report	Moderate-to-Vigorous PA	WC	rs1731951	7	137075847	T	A	377234	0.556	-0.01	0.002	5.62e-05	<0.001	153747	0.517	0.003	0.004	2.96e-06	0.5
Self Report	Moderate-to-Vigorous PA	WC	rs17573850	13	44885589	A	G	377234	0.741	0.012	0.003	6.08e-05	<0.001	153933	0.725	-0.004	0.005	4.41e-06	0.41
Self Report	Moderate-to-Vigorous PA	WC	rs17818431	22	20052420	G	A	377234	0.839	0.015	0.003	6.47e-05	<0.001	153782	0.825	-0.003	0.006	1.69e-06	0.61
Self Report	Moderate-to-Vigorous PA	WC	rs1857707	5	18277597	C	A	377234	0.855	-0.015	0.003	5.7e-05	<0.001	153847	0.808	-0.007	0.006	9.78e-06	0.22
Self Report	Moderate-to-Vigorous PA	WC	rs1921981	21	42422547	G	A	377234	0.674	0.013	0.002	8.03e-05	<0.001	153531	0.708	-0.007	0.005	1.35e-05	0.15
Self Report	Moderate-to-Vigorous PA	WC	rs1955896	14	99197274	A	G	377234	0.538	-0.01	0.002	5.67e-05	<0.001	153755	0.583	0.007	0.004	1.57e-05	0.12
Self Report	Moderate-to-Vigorous PA	WC	rs2035562	3	85056521	A	G	377234	0.328	-0.014	0.002	9.2e-05	<0.001	153760	0.3	-0.008	0.004	2.32e-05	0.059
Self Report	Moderate-to-Vigorous PA	WC	rs2148201	10	2323505	G	A	377234	0.509	-0.011	0.002	6.08e-05	<0.001	153522	0.475	-0.01	0.004	3.53e-05	0.02
Self Report	Moderate-to-Vigorous PA	WC	rs2240883	16	3645909	G	C	377234	0.987	-0.045	0.01	5.54e-05	<0.001	179376	0.983	0.003	0.017	1.73e-07	0.86
Self Report	Moderate-to-Vigorous PA	WC	rs2267443	22	42287454	A	G	377234	0.381	0.011	0.002	5.73e-05	<0.001	153412	0.425	0.004	0.005	4.62e-06	0.4
Self Report	Moderate-to-Vigorous PA	WC	rs2267549	12	4771682	G	A	377234	0.546	0.011	0.002	5.83e-05	<0.001	153217	0.567	-0.002	0.005	1.9e-06	0.59
Self Report	Moderate-to-Vigorous PA	WC	rs2283249	11	17824372	T	G	377234	0.752	-0.013	0.003	6.3e-05	<0.001	153892	0.742	-0.001	0.005	3.76e-07	0.81
Self Report	Moderate-to-Vigorous PA	WC	rs2388195	6	98283960	A	C	377234	0.561	-0.012	0.002	7.26e-05	<0.001	153714	0.642	0.003	0.004	3.55e-06	0.46
Self Report	Moderate-to-Vigorous PA	WC	rs2638463	12	89669785	G	A	377234	0.694	-0.012	0.003	5.57e-05	<0.001	153754	0.708	0.001	0.005	2.02e-07	0.86
Self Report	Moderate-to-Vigorous PA	WC	rs2710477	2	210508116	T	A	377234	0.919	-0.021	0.004	6.89e-05	<0.001	153837	0.917	0.009	0.008	7.91e-06	0.27
Self Report	Moderate-to-Vigorous PA	WC	rs2721937	8	116633699	C	T	377234	0.815	-0.014	0.003	6.18e-05	<0.001	153171	0.817	0.013	0.005	4.03e-05	0.013
Self Report	Moderate-to-Vigorous PA	WC	rs293566	20	31097877	T	C	377234	0.669	-0.011	0.002	5.86e-05	<0.001	153682	0.75	-0.006	0.005	9.79e-06	0.22
Self Report	Moderate-to-Vigorous PA	WC	rs2942127	1	204420067	G	A	377234	0.175	0.016	0.003	8.1e-05	<0.001	153943	0.195	-0.002	0.005	5.55e-07	0.77
Self Report	Moderate-to-Vigorous PA	WC	rs3774614	3	53841464	C	T	377234	0.459	0.011	0.002	6.92e-05	<0.001	153571	0.442	-0.004	0.004	6.71e-06	0.31
Self Report	Moderate-to-Vigorous PA	WC	rs3936938	1	181031797	G	A	377234	0.403	-0.011	0.002	6.11e-05	<0.001	151672	0.39	-0.01	0.004	3.31e-05	0.025
Self Report	Moderate-to-Vigorous PA	WC	rs4281659	15	61844443	T	C	377234	0.865	0.017	0.003	7.53e-05	<0.001	142202	0.908	-0.006	0.006	4.98e-06	0.4
Self Report	Moderate-to-Vigorous PA	WC	rs4375758	18	49587092	G	A	377234	0.875	0.016	0.003	5.86e-05	<0.001	153670	0.883	0	0.006	3.69e-08	0.94
Self Report	Moderate-to-Vigorous PA	WC	rs4518438	5	88157552	T	C	377234	0.49	-0.011	0.002	6.97e-05	<0.001	153890	0.525	-0.003	0.004	2.96e-06	0.5
Self Report	Moderate-to-Vigorous PA	WC	rs4621354	3	173588268	C	T	377234	0.842	-0.014	0.003	5.55e-05	<0.001	153947	0.833	0.005	0.006	4.8e-06	0.39
Self Report	Moderate-to-Vigorous PA	WC	rs466727	20	15626740	G	C	377234	0.329	0.011	0.002	5.77e-05	<0.001	153583	0.367	0.001	0.005	3e-07	0.83
Self Report	Moderate-to-Vigorous PA	WC	rs4787924	16	24264538	G	A	377234	0.475	-0.011	0.002	6.41e-05	<0.001	153942	0.492	-0.002	0.004	1.03e-06	0.69
Self Report	Moderate-to-Vigorous PA	WC	rs4886868	15	74353561	T	G	377234	0.414	-0.012	0.002	8.07e-05	<0.001	141169	0.25	0.001	0.005	2.2e-07	0.86
Self Report	Moderate-to-Vigorous PA	WC	rs4947350	6	32767620	T	C	377234	0.8	0.017	0.003	0.000105	<0.001	152532	0.808	0	0.005	0	1
Self Report	Moderate-to-Vigorous PA	WC	rs526852	11	65891432	G	A	377234	0.421	-0.012	0.002	7.76e-05	<0.001	153949	0.408	0.007	0.004	1.66e-05	0.11
Self Report	Moderate-to-Vigorous PA	WC	rs5755125	22	34993396	C	G	377234	0.216	0.013	0.003	6.48e-05	<0.001	153723	0.233	0.004	0.005	3.55e-06	0.46
Self Report	Moderate-to-Vigorous PA	WC	rs662638	11	57686764	T	C	377234	0.444	0.012	0.002	7.4e-05	<0.001	153951	0.45	0.002	0.004	1.69e-06	0.61
Self Report	Moderate-to-Vigorous PA	WC	rs6743932	2	35005351	G	A	377234	0.803	-0.013	0.003	5.62e-05	<0.001	153809	0.858	0.002	0.006	1.11e-06	0.68
Self Report	Moderate-to-Vigorous PA	WC	rs6812265	4	139726791	C	T	377234	0.548	0.011	0.002	6.92e-05	<0.001	153934	0.533	0.001	0.004	3.36e-07	0.82
Self Report	Moderate-to-Vigorous PA	WC	rs6819429	4	159861907	T	C	377234	0.341	0.013	0.002	8.03e-05	<0.001	153932	0.333	0.002	0.005	7.74e-07	0.73
Self Report	Moderate-to-Vigorous PA	WC	rs6857	19	45392254	C	T	377234	0.83	-0.019	0.003	0.000108	<0.001	151107	0.842	0.025	0.006	0.000102	<0.001
Self Report	Moderate-to-Vigorous PA	WC	rs710187	22	38204089	C	T	377234	0.442	0.01	0.002	5.95e-05	<0.001	153793	0.467	0.007	0.004	1.57e-05	0.12
Self Report	Moderate-to-Vigorous PA	WC	rs7188855	16	52469602	A	T	377234	0.556	0.012	0.002	7.2e-05	<0.001	153941	0.517	-0.009	0.004	2.61e-05	0.045
Self Report	Moderate-to-Vigorous PA	WC	rs719263	22	49685455	T	C	377234	0.195	-0.013	0.003	5.83e-05	<0.001	153790	0.192	0.004	0.005	4.05e-06	0.43
Self Report	Moderate-to-Vigorous PA	WC	rs7233752	18	67399208	A	G	377234	0.805	0.013	0.003	5.67e-05	<0.001	153559	0.792	-0.002	0.005	6.08e-07	0.76
Self Report	Moderate-to-Vigorous PA	WC	rs7508365	19	13151477	T	C	377234	0.28	-0.011	0.002	5.7e-05	<0.001	131153	0.242	0.004	0.006	5.18e-06	0.41
Self Report	Moderate-to-Vigorous PA	WC	rs7521047	1	154076366	T	C	377234	0.46	0.012	0.002	7.59e-05	<0.001	232015	0.405	0.005	0.003	8.93e-06	0.15
Self Report	Moderate-to-Vigorous PA	WC	rs7648547	3	41188000	A	C	377234	0.461	-0.012	0.002	7.55e-05	<0.001	152967	0.55	0.013	0.005	4.82e-05	0.0066
Self Report	Moderate-to-Vigorous PA	WC	rs7652008	3	127160434	T	C	377234	0.537	-0.011	0.002	6.11e-05	<0.001	153859	0.592	-0.003	0.004	3.1e-06	0.49
Self Report	Moderate-to-Vigorous PA	WC	rs7690846	4	113988045	T	C	377234	0.484	0.01	0.002	5.84e-05	<0.001	152476	0.483	0	0.005	2.58e-08	0.95
Self Report	Moderate-to-Vigorous PA	WC	rs7760670	6	73190006	C	T	377234	0.704	0.013	0.002	7.23e-05	<0.001	153917	0.717	0.002	0.005	7.16e-07	0.74
Self Report	Moderate-to-Vigorous PA	WC	rs7804463	7	133447651	T	C	377234	0.53	0.015	0.002	0.000122	<0.001	153849	0.508	-0.002	0.004	1.42e-06	0.64
Self Report	Moderate-to-Vigorous PA	WC	rs8019978	14	55557284	G	A	377234	0.558	0.01	0.002	5.61e-05	<0.001	153716	0.508	0	0.004	0	1
Self Report	Moderate-to-Vigorous PA	WC	rs8058726	16	83207316	A	T	377234	0.712	-0.011	0.002	5.84e-05	<0.001	152479	0.617	0	0.005	5.06e-08	0.93
Self Report	Moderate-to-Vigorous PA	WC	rs868866	1	151761804	A	G	377234	0.501	-0.011	0.002	6.49e-05	<0.001	153887	0.5	-0.002	0.004	1.11e-06	0.68
Self Report	Moderate-to-Vigorous PA	WC	rs9513912	13	102187073	A	G	377234	0.962	-0.027	0.006	5.61e-05	<0.001	138867	0.975	-0.005	0.011	1.23e-06	0.68
Self Report	Moderate-to-Vigorous PA	WC	rs9584870	13	99245866	T	C	377234	0.633	-0.011	0.002	5.9e-05	<0.001	153675	0.692	0.009	0.005	2.44e-05	0.053
Self Report	Moderate-to-Vigorous PA	WC	rs9919769	12	126827971	A	G	377234	0.774	-0.012	0.003	5.88e-05	<0.001	153938	0.775	0.007	0.005	1.07e-05	0.2
Self Report	Moderate-to-Vigorous PA	WC	rs997467	2	199182704	T	C	377234	0.428	-0.012	0.002	7.08e-05	<0.001	153893	0.45	-0.002	0.004	1.89e-06	0.59
Self Report	Vigorous PA	WC	rs11153258	6	111222552	C	T	261055	0.801	-0.008	0.002	5.64e-05	<0.001	143918	0.85	-0.001	0.005	1.58e-07	0.88
Self Report	Vigorous PA	WC	rs11643648	16	78514583	C	T	261055	0.926	-0.012	0.003	6.11e-05	<0.001	149342	0.95	0.007	0.008	4.17e-06	0.43
Self Report	Vigorous PA	WC	rs12059540	1	154845256	T	G	261055	0.971	-0.019	0.004	6.22e-05	<0.001	148821	0.974	0.018	0.013	1.39e-05	0.15
Self Report	Vigorous PA	WC	rs12480549	20	14148547	G	A	261055	0.806	-0.008	0.002	5.73e-05	<0.001	153588	0.808	0	0.005	1.02e-09	0.99
Self Report	Vigorous PA	WC	rs1248860	3	85015779	G	A	261055	0.484	-0.01	0.001	0.000146	<0.001	153925	0.408	-0.005	0.004	8.97e-06	0.24
Self Report	Vigorous PA	WC	rs12612409	2	69941287	C	T	261055	0.911	-0.011	0.002	6.14e-05	<0.001	153770	0.833	-0.003	0.008	7.75e-07	0.73
Self Report	Vigorous PA	WC	rs13118259	4	139038611	G	C	261055	0.085	0.011	0.002	5.97e-05	<0.001	153933	0.083	-0.004	0.008	1.79e-06	0.6
Self Report	Vigorous PA	WC	rs13174601	5	51238100	T	C	261055	0.93	-0.013	0.003	6.18e-05	<0.001	93281	0.958	-0.011	0.021	2.95e-06	0.6
Self Report	Vigorous PA	WC	rs13243553	7	133506955	G	A	261055	0.608	0.009	0.001	0.000112	<0.001	153898	0.525	-0.003	0.004	3.87e-06	0.44
Self Report	Vigorous PA	WC	rs13252533	8	104814032	A	G	261055	0.806	0.008	0.002	5.67e-05	<0.001	153882	0.783	0.005	0.005	6.7e-06	0.31
Self Report	Vigorous PA	WC	rs13375273	1	181819083	G	A	261055	0.677	-0.007	0.001	5.95e-05	<0.001	153489	NA	-0.004	0.005	3.88e-06	0.44
Self Report	Vigorous PA	WC	rs17219084	16	53855600	A	G	261055	0.624	-0.006	0.001	5.76e-05	<0.001	231612	0.625	0	0.004	1.7e-08	0.95
Self Report	Vigorous PA	WC	rs17597778	4	162902865	T	G	261055	0.888	0.01	0.002	5.73e-05	<0.001	153904	0.917	-0.011	0.007	1.66e-05	0.11
Self Report	Vigorous PA	WC	rs1774859	1	117872697	C	T	261055	0.635	-0.006	0.001	5.9e-05	<0.001	112640	0.69	0.009	0.005	2.6e-05	0.087
Self Report	Vigorous PA	WC	rs1857707	5	18277597	C	A	261055	0.855	-0.009	0.002	5.67e-05	<0.001	153847	0.808	-0.007	0.006	9.78e-06	0.22
Self Report	Vigorous PA	WC	rs2189464	7	8633758	C	T	261055	0.752	0.008	0.002	6.65e-05	<0.001	153858	0.758	0.007	0.005	1.28e-05	0.16
Self Report	Vigorous PA	WC	rs2253310	6	108888593	C	G	261055	0.374	0.009	0.001	0.000113	<0.001	153894	0.425	-0.016	0.004	8.27e-05	<0.001
Self Report	Vigorous PA	WC	rs2663648	2	210491839	C	T	261055	0.884	-0.011	0.002	7.17e-05	<0.001	153912	0.875	0.006	0.007	4.23e-06	0.42
Self Report	Vigorous PA	WC	rs2922754	2	225909316	G	A	261055	0.242	0.007	0.002	5.95e-05	<0.001	153913	0.183	0.003	0.005	1.79e-06	0.6
Self Report	Vigorous PA	WC	rs328902	7	35020843	C	T	261055	0.685	-0.009	0.001	0.000102	<0.001	153944	0.725	-0.004	0.005	4.6e-06	0.4
Self Report	Vigorous PA	WC	rs336604	3	18620284	A	T	261055	0.301	0.007	0.001	6.05e-05	<0.001	153937	0.383	-0.007	0.005	1.41e-05	0.14
Self Report	Vigorous PA	WC	rs3781411	10	126715436	C	T	261055	0.876	0.013	0.002	0.000105	<0.001	231759	0.858	0.008	0.005	1.1e-05	0.11
Self Report	Vigorous PA	WC	rs4375758	18	49587092	G	A	261055	0.875	0.01	0.002	7.17e-05	<0.001	153670	0.883	0	0.006	3.69e-08	0.94
Self Report	Vigorous PA	WC	rs4556111	8	113382838	T	C	261055	0.466	-0.007	0.001	7.15e-05	<0.001	153908	0.483	-0.003	0.004	3.1e-06	0.49
Self Report	Vigorous PA	WC	rs526852	11	65891432	G	A	261055	0.422	-0.007	0.001	6.38e-05	<0.001	153949	0.408	0.007	0.004	1.66e-05	0.11
Self Report	Vigorous PA	WC	rs5742915	15	74336633	T	C	261055	0.539	-0.007	0.001	6.68e-05	<0.001	231906	0.45	-0.002	0.004	7.34e-07	0.68
Self Report	Vigorous PA	WC	rs577525	10	99769388	T	C	261055	0.437	0.006	0.001	6e-05	<0.001	153931	0.425	-0.012	0.004	5.41e-05	0.0039
Self Report	Vigorous PA	WC	rs608410	1	88770663	T	C	261055	0.275	0.007	0.001	6.26e-05	<0.001	153924	0.208	-0.009	0.005	2.18e-05	0.067
Self Report	Vigorous PA	WC	rs6562062	13	60503637	G	A	261055	0.372	-0.006	0.001	5.76e-05	<0.001	112627	0.302	0.005	0.005	8.08e-06	0.34
Self Report	Vigorous PA	WC	rs6689056	1	24364531	G	A	261055	0.674	0.008	0.001	7.75e-05	<0.001	152814	0.603	0.003	0.005	2.46e-06	0.54
Self Report	Vigorous PA	WC	rs6912002	6	32765268	T	C	261055	0.673	0.008	0.001	8.47e-05	<0.001	230620	0.733	0	0.004	6.85e-08	0.9
Self Report	Vigorous PA	WC	rs7160630	14	98637479	A	G	261055	0.792	-0.009	0.002	7.55e-05	<0.001	153945	0.783	-0.007	0.005	1.02e-05	0.21
Self Report	Vigorous PA	WC	rs7521837	1	154252860	T	C	261055	0.749	0.009	0.002	8.67e-05	<0.001	153943	0.758	0.007	0.005	1.17e-05	0.18
Self Report	Vigorous PA	WC	rs7715147	5	60053220	C	A	261055	0.758	-0.007	0.002	5.57e-05	<0.001	131938	0.775	-0.003	0.006	1.66e-06	0.64
Self Report	Vigorous PA	WC	rs7749938	6	10362511	C	T	261055	0.985	0.026	0.006	5.83e-05	<0.001	123845	0.975	0.002	0.019	1.28e-07	0.9
Self Report	Vigorous PA	WC	rs8142972	22	41084530	T	C	261055	0.859	-0.01	0.002	6.78e-05	<0.001	153810	0.842	0.003	0.006	1.26e-06	0.66
Self Report	Vigorous PA	WC	rs920447	11	116108902	G	A	261055	0.814	0.009	0.002	6.82e-05	<0.001	142153	0.817	-0.002	0.006	8.38e-07	0.73
Self Report	Vigorous PA	WC	rs9324424	8	136900266	G	A	261055	0.741	0.007	0.001	6.35e-05	<0.001	153925	0.733	-0.008	0.005	2.03e-05	0.077
Self Report	Vigorous PA	WC	rs9387216	6	97729953	C	A	261055	0.748	-0.008	0.002	7.17e-05	<0.001	153756	0.758	0.008	0.005	1.66e-05	0.11
Self Report	Strenuous Sports & Other Exercises	WC	rs1007966	9	92213967	G	A	350492	0.493	0.005	0.001	6.02e-05	<0.001	153901	0.492	-0.011	0.004	3.92e-05	0.014
Self Report	Strenuous Sports & Other Exercises	WC	rs10225928	7	85802734	A	G	350492	0.199	0.007	0.001	6e-05	<0.001	153808	0.2	-0.002	0.005	7.16e-07	0.74
Self Report	Strenuous Sports & Other Exercises	WC	rs10821729	10	62099173	C	T	350492	0.49	-0.005	0.001	5.68e-05	<0.001	153779	0.508	0	0.004	5.02e-08	0.93
Self Report	Strenuous Sports & Other Exercises	WC	rs10879547	12	73497463	C	T	350492	0.756	-0.006	0.001	5.7e-05	<0.001	153872	0.7	-0.003	0.005	1.79e-06	0.6
Self Report	Strenuous Sports & Other Exercises	WC	rs11210230	1	73860239	T	C	350492	0.881	-0.009	0.002	7.4e-05	<0.001	153939	0.85	0.001	0.007	5.01e-08	0.93
Self Report	Strenuous Sports & Other Exercises	WC	rs11625806	14	37022739	G	A	350492	0.592	-0.006	0.001	6.55e-05	<0.001	153943	0.625	0.001	0.004	1.74e-07	0.87
Self Report	Strenuous Sports & Other Exercises	WC	rs11934368	4	178899883	A	C	350492	0.728	0.006	0.001	5.86e-05	<0.001	153865	0.817	0.007	0.005	1.17e-05	0.18
Self Report	Strenuous Sports & Other Exercises	WC	rs12031924	1	96877405	C	T	350492	0.76	0.006	0.001	6.35e-05	<0.001	153927	0.758	-0.012	0.005	3.57e-05	0.019
Self Report	Strenuous Sports & Other Exercises	WC	rs12372334	12	23727824	A	T	350492	0.618	-0.005	0.001	5.71e-05	<0.001	153691	0.533	0	0.004	5.02e-08	0.93
Self Report	Strenuous Sports & Other Exercises	WC	rs12477961	2	199495674	A	G	350492	0.418	-0.006	0.001	6.26e-05	<0.001	153915	0.358	0.002	0.004	1.69e-06	0.61
Self Report	Strenuous Sports & Other Exercises	WC	rs1265178	6	31161229	G	A	350492	0.762	0.007	0.001	8.12e-05	<0.001	152549	0.742	-0.006	0.005	7.34e-06	0.29
Self Report	Strenuous Sports & Other Exercises	WC	rs12821008	12	49474605	C	T	350492	0.594	-0.006	0.001	7.29e-05	<0.001	153539	0.65	-0.008	0.004	2.32e-05	0.059
Self Report	Strenuous Sports & Other Exercises	WC	rs12973258	19	19488718	T	C	350492	0.816	0.009	0.001	9.27e-05	<0.001	90098	NA	0	0.007	1.74e-09	0.99
Self Report	Strenuous Sports & Other Exercises	WC	rs13107325	4	103188709	C	T	350492	0.925	0.011	0.002	6.92e-05	<0.001	231570	0.883	-0.023	0.007	4.21e-05	0.0018
Self Report	Strenuous Sports & Other Exercises	WC	rs13207819	6	97971404	G	A	350492	0.765	-0.007	0.001	6.7e-05	<0.001	153825	0.75	0.015	0.005	5.54e-05	0.0035
Self Report	Strenuous Sports & Other Exercises	WC	rs13270385	8	105164753	T	C	350492	0.697	-0.006	0.001	5.68e-05	<0.001	153918	0.758	0.003	0.005	2.21e-06	0.56
Self Report	Strenuous Sports & Other Exercises	WC	rs13284832	9	128435126	A	C	350492	0.571	-0.005	0.001	6e-05	<0.001	153731	0.592	0	0.004	0	1
Self Report	Strenuous Sports & Other Exercises	WC	rs1415035	6	69730452	C	T	350492	0.836	0.008	0.002	6.85e-05	<0.001	153649	0.908	0.002	0.006	7.17e-07	0.74
Self Report	Strenuous Sports & Other Exercises	WC	rs1477117	12	109888779	G	A	350492	0.811	0.007	0.001	6.02e-05	<0.001	232056	0.817	-0.005	0.004	5.24e-06	0.27
Self Report	Strenuous Sports & Other Exercises	WC	rs1625595	11	66078129	C	T	350492	0.532	0.006	0.001	7.4e-05	<0.001	153877	0.475	-0.01	0.004	3.02e-05	0.031
Self Report	Strenuous Sports & Other Exercises	WC	rs1638525	17	19848594	G	C	350492	0.603	0.008	0.001	0.000114	<0.001	153947	0.592	0.009	0.004	2.83e-05	0.037
Self Report	Strenuous Sports & Other Exercises	WC	rs17062635	5	163375485	G	A	350492	0.546	-0.006	0.001	6.5e-05	<0.001	153775	0.542	-0.008	0.004	2.54e-05	0.048
Self Report	Strenuous Sports & Other Exercises	WC	rs17145573	11	56969455	G	A	350492	0.89	-0.009	0.002	6.54e-05	<0.001	153758	0.842	0.001	0.007	6.56e-08	0.92
Self Report	Strenuous Sports & Other Exercises	WC	rs173946	5	60488297	T	C	350492	0.605	-0.007	0.001	9.73e-05	<0.001	153947	0.617	-0.003	0.004	2.32e-06	0.55
Self Report	Strenuous Sports & Other Exercises	WC	rs17565975	11	111586950	G	A	350492	0.437	0.005	0.001	5.77e-05	<0.001	153658	0.533	0.003	0.004	3.25e-06	0.48
Self Report	Strenuous Sports & Other Exercises	WC	rs1932202	9	75970379	C	T	350492	0.752	0.007	0.001	6.86e-05	<0.001	150606	0.667	-0.008	0.005	1.45e-05	0.14
Self Report	Strenuous Sports & Other Exercises	WC	rs2148201	10	2323505	G	A	350492	0.508	-0.006	0.001	6.81e-05	<0.001	153522	0.475	-0.01	0.004	3.53e-05	0.02
Self Report	Strenuous Sports & Other Exercises	WC	rs2156044	18	33388938	G	C	350492	0.656	-0.006	0.001	5.79e-05	<0.001	153549	0.667	0.003	0.005	2.57e-06	0.53
Self Report	Strenuous Sports & Other Exercises	WC	rs2238046	12	2299998	A	C	350492	0.612	-0.006	0.001	6.5e-05	<0.001	153895	0.592	-0.002	0.004	8.35e-07	0.72
Self Report	Strenuous Sports & Other Exercises	WC	rs2271271	10	75558867	G	A	350492	0.28	0.006	0.001	6.9e-05	<0.001	153916	0.275	-0.006	0.005	1.17e-05	0.18
Self Report	Strenuous Sports & Other Exercises	WC	rs2278480	3	25635743	T	C	350492	0.713	-0.006	0.001	5.71e-05	<0.001	153307	0.658	0.008	0.005	1.99e-05	0.081
Self Report	Strenuous Sports & Other Exercises	WC	rs246743	7	140690009	T	G	350492	0.147	0.008	0.002	6.66e-05	<0.001	151735	0.142	0.005	0.006	5.08e-06	0.38
Self Report	Strenuous Sports & Other Exercises	WC	rs2470893	15	75019449	C	T	350492	0.67	0.006	0.001	7.84e-05	<0.001	229589	0.725	-0.008	0.004	1.98e-05	0.033
Self Report	Strenuous Sports & Other Exercises	WC	rs2668196	3	165502709	A	T	350492	0.192	-0.007	0.001	6.4e-05	<0.001	151578	0.192	0.002	0.006	1.12e-06	0.68
Self Report	Strenuous Sports & Other Exercises	WC	rs2821549	1	111184045	G	C	350492	0.721	0.006	0.001	6.26e-05	<0.001	153348	0.725	-0.004	0.005	3.89e-06	0.44
Self Report	Strenuous Sports & Other Exercises	WC	rs2871340	2	100884117	G	T	350492	0.503	-0.006	0.001	7.48e-05	<0.001	153680	0.525	0.002	0.004	1.26e-06	0.66
Self Report	Strenuous Sports & Other Exercises	WC	rs288071	2	210408416	A	G	350492	0.902	-0.011	0.002	8.36e-05	<0.001	153887	0.875	0.005	0.007	4.05e-06	0.43
Self Report	Strenuous Sports & Other Exercises	WC	rs3129334	4	3368526	T	C	350492	0.403	0.006	0.001	7.44e-05	<0.001	153936	0.367	-0.005	0.004	7.58e-06	0.28
Self Report	Strenuous Sports & Other Exercises	WC	rs354364	6	66304163	T	C	350492	0.75	-0.006	0.001	5.57e-05	<0.001	153887	0.733	-0.006	0.005	8.6e-06	0.25
Self Report	Strenuous Sports & Other Exercises	WC	rs3733876	5	176382995	G	A	350492	0.814	0.007	0.001	6.54e-05	<0.001	232074	0.8	0.001	0.004	3.06e-07	0.79
Self Report	Strenuous Sports & Other Exercises	WC	rs3771544	2	69771484	C	T	350492	0.608	-0.006	0.001	6.11e-05	<0.001	153832	0.558	-0.003	0.004	3.24e-06	0.48
Self Report	Strenuous Sports & Other Exercises	WC	rs400432	3	18623278	A	G	350492	0.301	0.006	0.001	6.83e-05	<0.001	153807	0.383	-0.007	0.005	1.35e-05	0.15
Self Report	Strenuous Sports & Other Exercises	WC	rs4084828	2	118893347	C	T	350492	0.463	-0.006	0.001	6.76e-05	<0.001	138992	0.5	0.002	0.005	1.39e-06	0.66
Self Report	Strenuous Sports & Other Exercises	WC	rs4411372	13	99130423	T	C	350492	0.72	-0.007	0.001	8.36e-05	<0.001	153938	0.783	0.01	0.005	2.83e-05	0.037
Self Report	Strenuous Sports & Other Exercises	WC	rs4432322	18	22689878	T	C	350492	0.359	-0.005	0.001	5.63e-05	<0.001	153777	0.367	0.003	0.005	3.24e-06	0.48
Self Report	Strenuous Sports & Other Exercises	WC	rs4601350	8	113329886	C	T	350492	0.451	-0.006	0.001	6.3e-05	<0.001	153848	0.45	-0.004	0.004	4.8e-06	0.39
Self Report	Strenuous Sports & Other Exercises	WC	rs4658403	1	243832560	C	T	350492	0.166	-0.008	0.002	6.76e-05	<0.001	153014	0.161	0.014	0.006	3.43e-05	0.022
Self Report	Strenuous Sports & Other Exercises	WC	rs4743038	9	109645987	A	T	350492	0.802	0.007	0.001	5.7e-05	<0.001	153889	0.783	-0.007	0.005	1.12e-05	0.19
Self Report	Strenuous Sports & Other Exercises	WC	rs4799	2	10933249	C	T	350492	0.521	0.006	0.001	6.77e-05	<0.001	153902	0.433	-0.006	0.004	1.17e-05	0.18
Self Report	Strenuous Sports & Other Exercises	WC	rs4811141	20	49851464	G	A	350492	0.127	-0.008	0.002	6.57e-05	<0.001	58518	NA	0.006	0.01	7.07e-06	0.52
Self Report	Strenuous Sports & Other Exercises	WC	rs4865667	5	50748173	C	T	350492	0.613	0.007	0.001	8.72e-05	<0.001	153937	0.567	-0.005	0.004	1.02e-05	0.21
Self Report	Strenuous Sports & Other Exercises	WC	rs4890829	18	74540433	C	T	350492	0.362	-0.006	0.001	6.22e-05	<0.001	153750	0.367	-0.004	0.004	4.61e-06	0.4
Self Report	Strenuous Sports & Other Exercises	WC	rs4899284	14	69650845	A	G	350492	0.355	0.007	0.001	8.58e-05	<0.001	153912	0.367	0.003	0.004	2.69e-06	0.52
Self Report	Strenuous Sports & Other Exercises	WC	rs4900442	14	100158241	C	T	350492	0.539	-0.005	0.001	6.26e-05	<0.001	153630	0.55	0.001	0.004	2.02e-07	0.86
Self Report	Strenuous Sports & Other Exercises	WC	rs526231	5	102681381	C	T	350492	0.672	-0.006	0.001	5.95e-05	<0.001	153933	0.617	-0.002	0.005	1.18e-06	0.67
Self Report	Strenuous Sports & Other Exercises	WC	rs577525	10	99769388	T	C	350492	0.437	0.006	0.001	7.02e-05	<0.001	153931	0.425	-0.012	0.004	5.41e-05	0.0039
Self Report	Strenuous Sports & Other Exercises	WC	rs7002919	8	15874907	C	G	350492	0.918	-0.01	0.002	5.9e-05	<0.001	153650	0.908	-0.005	0.008	2.69e-06	0.52
Self Report	Strenuous Sports & Other Exercises	WC	rs7031064	9	14455076	A	G	350492	0.517	-0.006	0.001	6.85e-05	<0.001	153780	0.55	0.008	0.004	2.05e-05	0.076
Self Report	Strenuous Sports & Other Exercises	WC	rs7034243	9	122688811	A	G	350492	0.659	-0.006	0.001	7.53e-05	<0.001	153605	0.692	-0.004	0.005	5.93e-06	0.34
Self Report	Strenuous Sports & Other Exercises	WC	rs705692	1	7480217	C	T	350492	0.108	-0.009	0.002	6.59e-05	<0.001	153880	0.125	-0.013	0.007	2.12e-05	0.071
Self Report	Strenuous Sports & Other Exercises	WC	rs7205420	16	8296948	A	T	350492	0.793	-0.007	0.001	6.3e-05	<0.001	153816	0.783	-0.003	0.005	2.44e-06	0.54
Self Report	Strenuous Sports & Other Exercises	WC	rs7228225	18	53529456	A	T	350492	0.415	0.005	0.001	5.86e-05	<0.001	153621	0.417	0.007	0.004	1.42e-05	0.14
Self Report	Strenuous Sports & Other Exercises	WC	rs7588028	2	1119227	G	A	350492	0.607	0.005	0.001	5.68e-05	<0.001	153530	0.583	0	0.004	2.56e-08	0.95
Self Report	Strenuous Sports & Other Exercises	WC	rs7607737	2	183728290	C	T	350492	0.883	-0.008	0.002	5.7e-05	<0.001	153929	0.883	0.007	0.007	6.98e-06	0.3
Self Report	Strenuous Sports & Other Exercises	WC	rs7627864	3	49926613	C	G	350492	0.569	0.007	0.001	8.86e-05	<0.001	153785	0.533	-0.004	0.004	5.68e-06	0.35
Self Report	Strenuous Sports & Other Exercises	WC	rs763187	6	166955738	A	G	350492	0.171	-0.008	0.002	6.89e-05	<0.001	141943	0.208	0.006	0.006	5.66e-06	0.37
Self Report	Strenuous Sports & Other Exercises	WC	rs7718022	5	147941845	G	C	350492	0.487	-0.005	0.001	5.97e-05	<0.001	152485	0.475	0.002	0.004	1.9e-06	0.59
Self Report	Strenuous Sports & Other Exercises	WC	rs7740107	6	130374461	T	A	350492	0.264	-0.006	0.001	6.6e-05	<0.001	153914	0.25	0.01	0.005	2.66e-05	0.043
Self Report	Strenuous Sports & Other Exercises	WC	rs795980	4	140801666	A	G	350492	0.668	-0.006	0.001	6.35e-05	<0.001	231854	0.692	0.008	0.004	2.14e-05	0.026
Self Report	Strenuous Sports & Other Exercises	WC	rs896302	6	98806496	C	T	350492	0.287	0.007	0.001	8.44e-05	<0.001	153925	0.342	0.003	0.005	2.69e-06	0.52
Self Report	Strenuous Sports & Other Exercises	WC	rs9177	7	1787236	A	G	350492	0.51	0.006	0.001	6.75e-05	<0.001	150805	0.612	0	0.005	8.47e-08	0.91
Self Report	Strenuous Sports & Other Exercises	WC	rs9293777	5	78661452	C	T	350492	0.653	-0.006	0.001	6.18e-05	<0.001	151468	0.675	-0.008	0.005	1.69e-05	0.11
Self Report	Strenuous Sports & Other Exercises	WC	rs9420	11	57510294	A	G	350492	0.324	-0.006	0.001	5.7e-05	<0.001	153943	0.258	0.008	0.004	2.26e-05	0.062
Self Report	Strenuous Sports & Other Exercises	WC	rs9563168	13	54247827	G	A	350492	0.79	-0.007	0.001	6.02e-05	<0.001	153943	0.7	0.005	0.005	5.67e-06	0.35
Self Report	Strenuous Sports & Other Exercises	WC	rs9604803	22	18398207	C	A	350492	0.671	0.006	0.001	6.46e-05	<0.001	153596	0.642	0	0.004	1.64e-08	0.96
Self Report	Strenuous Sports & Other Exercises	WC	rs968304	1	169094100	T	A	350492	0.411	-0.006	0.001	7.93e-05	<0.001	152952	0.467	0	0.004	1.64e-08	0.96
Self Report	Strenuous Sports & Other Exercises	WC	rs9861451	3	85409353	A	G	350492	0.273	0.011	0.001	0.0002	<0.001	153936	0.333	0.013	0.005	4.41e-05	0.0092
Self Report	Strenuous Sports & Other Exercises	WC	rs9903845	17	50291181	C	A	350492	0.673	0.006	0.001	6.51e-05	<0.001	153852	0.642	0.002	0.005	1.18e-06	0.67
Self Report	Sedentary Behavior	%TBF	rs10041724	5	124273520	T	C	422218	0.808	0.018	0.003	0.000116	<0.001	76062.9	0.21	0.01	0.007	2.7e-05	0.1519
Self Report	Sedentary Behavior	%TBF	rs10145592	14	94287215	C	G	422218	0.409	-0.015	0.002	0.00012	<0.001	76085	0.386	0.01	0.006	4.03e-05	0.0801
Self Report	Sedentary Behavior	%TBF	rs10189857	2	60713235	A	G	422218	0.568	-0.02	0.002	0.000234	<0.001	76109.3	0.463	-0.002	0.006	1.74e-06	0.7161
Self Report	Sedentary Behavior	%TBF	rs1022785	14	29571653	G	A	422218	0.142	0.018	0.003	8.89e-05	<0.001	76134.1	0.144	0.01	0.008	2e-05	0.2173
Self Report	Sedentary Behavior	%TBF	rs10234444	7	41828527	G	A	422218	0.823	0.016	0.003	8.17e-05	<0.001	76089.6	0.824	-0.009	0.007	2.13e-05	0.2027
Self Report	Sedentary Behavior	%TBF	rs1031423	5	93276883	T	C	422218	0.215	-0.019	0.003	0.000132	<0.001	76105.8	0.802	0	0.007	2.83e-09	0.9883
Self Report	Sedentary Behavior	%TBF	rs10737620	1	193057971	T	A	422218	0.274	0.014	0.002	9.41e-05	<0.001	76083.5	0.294	0.002	0.006	1.36e-06	0.7474
Self Report	Sedentary Behavior	%TBF	rs10876864	12	56401085	G	A	422218	0.427	-0.013	0.002	9.91e-05	<0.001	74066	0.4	0.007	0.006	2.36e-05	0.1864
Self Report	Sedentary Behavior	%TBF	rs10932837	2	221044785	C	T	422218	0.494	-0.013	0.002	9.77e-05	<0.001	74341.3	0.484	0.01	0.005	4.89e-05	0.0565
Self Report	Sedentary Behavior	%TBF	rs11201422	10	86924483	T	C	422218	0.669	0.013	0.002	8.09e-05	<0.001	74293.2	0.31	0.007	0.006	1.78e-05	0.2501
Self Report	Sedentary Behavior	%TBF	rs11218575	11	122154576	C	T	422218	0.566	0.015	0.002	0.000131	<0.001	76072.5	0.587	-0.002	0.006	1.11e-06	0.7711
Self Report	Sedentary Behavior	%TBF	rs11245482	10	126733546	T	C	422218	0.613	-0.013	0.002	9.41e-05	<0.001	73847.2	0.376	-0.005	0.006	9.6e-06	0.3997
Self Report	Sedentary Behavior	%TBF	rs11689199	2	100820421	A	G	422218	0.598	0.018	0.002	0.000186	<0.001	76102.2	0.382	0.011	0.006	5.55e-05	0.0399
Self Report	Sedentary Behavior	%TBF	rs11763734	7	126400910	A	C	422218	0.51	-0.012	0.002	8.82e-05	<0.001	76097.2	0.462	-0.005	0.005	1.31e-05	0.3173
Self Report	Sedentary Behavior	%TBF	rs11985394	8	92667521	T	A	422218	0.545	0.012	0.002	8.58e-05	<0.001	76108.4	0.551	-0.008	0.005	2.6e-05	0.1593
Self Report	Sedentary Behavior	%TBF	rs1243182	10	21916728	C	T	422218	0.69	-0.019	0.002	0.000167	<0.001	76097.9	0.684	-0.015	0.006	8.49e-05	0.011
Self Report	Sedentary Behavior	%TBF	rs12491503	3	165706855	G	A	422218	0.67	-0.014	0.002	0.000102	<0.001	76129.1	0.668	0.005	0.006	1.01e-05	0.3804
Self Report	Sedentary Behavior	%TBF	rs13029509	2	215374209	G	A	422218	0.52	-0.018	0.002	0.000191	<0.001	74341.1	0.531	-0.008	0.006	2.65e-05	0.1605
Self Report	Sedentary Behavior	%TBF	rs13107325	4	103188709	C	T	422218	0.926	-0.029	0.004	0.000133	<0.001	86539.1	0.926	-0.028	0.01	8.43e-05	0.0069
Self Report	Sedentary Behavior	%TBF	rs1563908	5	60437381	A	G	422218	0.62	0.016	0.002	0.000143	<0.001	74335.6	0.366	0.004	0.006	6.5e-06	0.4871
Self Report	Sedentary Behavior	%TBF	rs17207890	11	95490754	G	A	422218	0.657	0.016	0.002	0.000125	<0.001	74629.8	0.675	-0.004	0.006	7.2e-06	0.4634
Self Report	Sedentary Behavior	%TBF	rs17379561	1	98340139	A	T	422218	0.856	-0.025	0.003	0.000183	<0.001	71684.9	0.845	0.01	0.008	2.29e-05	0.1998
Self Report	Sedentary Behavior	%TBF	rs17568389	7	8091876	T	A	422218	0.487	0.015	0.002	0.000136	<0.001	74340.3	0.479	0.007	0.006	2e-05	0.2232
Self Report	Sedentary Behavior	%TBF	rs17727474	10	127182959	C	T	422218	0.832	0.018	0.003	9.32e-05	<0.001	76083.7	0.817	-0.009	0.007	1.88e-05	0.2323
Self Report	Sedentary Behavior	%TBF	rs17789218	6	100600097	T	C	422218	0.756	0.019	0.003	0.000145	<0.001	90382.8	0.235	-0.008	0.006	2.47e-05	0.1352
Self Report	Sedentary Behavior	%TBF	rs2045147	10	56660437	A	G	422218	0.449	0.013	0.002	8.99e-05	<0.001	76072.4	0.562	0.002	0.005	2.18e-06	0.6837
Self Report	Sedentary Behavior	%TBF	rs2060199	2	166196681	T	A	422218	0.446	0.012	0.002	8.26e-05	<0.001	74341.2	0.449	0.01	0.005	5.09e-05	0.0518
Self Report	Sedentary Behavior	%TBF	rs2073869	9	135763816	C	T	422218	0.834	0.019	0.003	0.000109	<0.001	75220.2	0.817	0.014	0.007	4.81e-05	0.0573
Self Report	Sedentary Behavior	%TBF	rs2460	15	53073084	G	A	422218	0.736	-0.015	0.002	0.000103	<0.001	75608.5	0.736	-0.014	0.006	6.74e-05	0.0239
Self Report	Sedentary Behavior	%TBF	rs2616830	9	1721385	G	A	422218	0.462	0.016	0.002	0.000153	<0.001	76111.3	0.455	0.007	0.005	2.23e-05	0.193
Self Report	Sedentary Behavior	%TBF	rs2787374	9	103054951	T	C	422218	0.408	0.012	0.002	8.62e-05	<0.001	76128.5	0.544	-0.003	0.006	3.17e-06	0.6235
Self Report	Sedentary Behavior	%TBF	rs374722	2	147839830	G	A	422218	0.15	0.024	0.003	0.000174	<0.001	75216.4	0.164	0.012	0.007	3.67e-05	0.0965
Self Report	Sedentary Behavior	%TBF	rs3796386	3	49899795	G	A	422218	0.572	-0.026	0.002	0.000383	<0.001	75626.9	0.61	-0.012	0.006	6.38e-05	0.0281
Self Report	Sedentary Behavior	%TBF	rs4334769	4	130245233	G	T	422218	0.474	0.012	0.002	8.33e-05	<0.001	74327.2	0.471	-0.006	0.006	1.49e-05	0.2921
Self Report	Sedentary Behavior	%TBF	rs4382592	9	134870755	T	G	422218	0.301	0.014	0.002	8.92e-05	<0.001	76088.4	0.688	0.003	0.006	3.29e-06	0.6171
Self Report	Sedentary Behavior	%TBF	rs4435081	12	74331820	C	T	422218	0.53	0.012	0.002	8.29e-05	<0.001	76134.1	0.516	-0.005	0.005	9.53e-06	0.3943
Self Report	Sedentary Behavior	%TBF	rs4675246	2	202864487	G	T	422218	0.797	-0.015	0.003	8.17e-05	<0.001	68544.1	0.804	-0.005	0.008	6.31e-06	0.5106
Self Report	Sedentary Behavior	%TBF	rs4845364	1	154141908	A	G	422218	0.495	-0.015	0.002	0.000134	<0.001	76078.4	0.524	-0.008	0.005	2.74e-05	0.1486
Self Report	Sedentary Behavior	%TBF	rs4937842	11	133734542	G	C	422218	0.634	-0.013	0.002	8.54e-05	<0.001	76102.1	0.597	-0.004	0.006	7.75e-06	0.4426
Self Report	Sedentary Behavior	%TBF	rs6472942	8	76827190	T	C	422218	0.568	-0.013	0.002	9.6e-05	<0.001	74336.2	0.444	0.01	0.006	4.27e-05	0.0748
Self Report	Sedentary Behavior	%TBF	rs6673341	1	184655649	T	G	422218	0.465	-0.015	0.002	0.000119	<0.001	74331	0.55	-0.004	0.006	5.45e-06	0.5245
Self Report	Sedentary Behavior	%TBF	rs6754968	2	105414479	G	A	422218	0.653	-0.014	0.002	0.000104	<0.001	76132.1	0.646	-0.008	0.006	2.52e-05	0.1658
Self Report	Sedentary Behavior	%TBF	rs6825241	4	152543783	C	A	422218	0.536	-0.017	0.002	0.000163	<0.001	76134.1	0.568	-0.011	0.005	5.16e-05	0.0475
Self Report	Sedentary Behavior	%TBF	rs6905544	6	98411631	A	G	422218	0.399	-0.019	0.002	0.000196	<0.001	76090.9	0.63	-0.005	0.006	9.19e-06	0.403
Self Report	Sedentary Behavior	%TBF	rs6996198	8	65463442	C	T	422218	0.843	-0.016	0.003	8.07e-05	<0.001	74336.2	0.834	-0.009	0.007	1.87e-05	0.2388
Self Report	Sedentary Behavior	%TBF	rs707919	6	31641139	A	G	422218	0.717	-0.014	0.002	8.44e-05	<0.001	73484.9	0.316	-0.009	0.006	3.35e-05	0.1167
Self Report	Sedentary Behavior	%TBF	rs7089973	10	116569565	C	A	422218	0.619	-0.013	0.002	9.45e-05	<0.001	74333.7	0.63	0.003	0.006	4.24e-06	0.5745
Self Report	Sedentary Behavior	%TBF	rs749671	16	31088347	G	A	422218	0.629	0.016	0.002	0.00013	<0.001	100669	0.615	0.013	0.005	7.33e-05	0.0066
Self Report	Sedentary Behavior	%TBF	rs7564130	2	50606642	T	C	422218	0.641	-0.015	0.002	0.000118	<0.001	73883.2	0.375	0	0.006	1.73e-08	0.9715
Self Report	Sedentary Behavior	%TBF	rs7693703	4	118357405	G	A	422218	0.91	0.023	0.004	9.39e-05	<0.001	73852.2	0.905	0.018	0.01	4.97e-05	0.0553
Self Report	Sedentary Behavior	%TBF	rs7700107	4	17880416	A	C	422218	0.863	-0.021	0.003	0.00012	<0.001	76108.5	0.16	-0.019	0.008	7.47e-05	0.0171
Self Report	Sedentary Behavior	%TBF	rs801733	11	65934549	A	C	422218	0.641	0.017	0.002	0.000149	<0.001	90332.9	0.345	0.008	0.005	2.89e-05	0.1061
Self Report	Sedentary Behavior	%TBF	rs870151	9	92230747	T	A	422218	0.528	-0.016	0.002	0.000136	<0.001	74065.2	0.531	-0.014	0.006	8.44e-05	0.0124
Self Report	Sedentary Behavior	%TBF	rs8756	12	66359752	C	A	422218	0.485	-0.013	0.002	0.000102	<0.001	100612	0.468	-0.002	0.005	1.01e-06	0.7494
Self Report	Sedentary Behavior	%TBF	rs9326862	5	112054547	A	T	422218	0.468	0.012	0.002	8.22e-05	<0.001	76116.6	0.461	-0.004	0.005	7.21e-06	0.4589
Self Report	Sedentary Behavior	%TBF	rs9563168	13	54247827	G	A	422218	0.791	0.018	0.003	0.000115	<0.001	75624.2	0.796	0.008	0.007	1.8e-05	0.2433
Self Report	Sedentary Behavior	%TBF	rs973734	7	89387578	C	A	422218	0.152	0.017	0.003	8.51e-05	<0.001	66211	0.156	-0.006	0.008	9.67e-06	0.4237
Self Report	Sedentary Behavior	%TBF	rs9834970	3	36856030	T	C	422218	0.501	0.013	0.002	9.29e-05	<0.001	60872.8	0.496	-0.008	0.006	3.07e-05	0.1717
Self Report	Moderate PA	%TBF	rs10499298	6	156134070	C	T	360912	0.866	-0.016	0.003	6.35e-05	<0.001	75854	0.873	0.006	0.008	6.76e-06	0.474
Self Report	Moderate PA	%TBF	rs10733788	10	64917865	T	C	360912	0.187	0.015	0.003	6.84e-05	<0.001	73125	0.788	-0.006	0.007	1.1e-05	0.3705
Self Report	Moderate PA	%TBF	rs11210871	1	44029353	C	G	360912	0.299	0.013	0.003	7.22e-05	<0.001	75597.3	0.33	-0.006	0.006	1.46e-05	0.2929
Self Report	Moderate PA	%TBF	rs1125854	7	131927170	T	C	360912	0.372	0.011	0.002	6.04e-05	<0.001	56522.9	0.624	-0.002	0.006	1.14e-06	0.7995
Self Report	Moderate PA	%TBF	rs12515547	5	52965231	G	A	360912	0.784	0.013	0.003	5.92e-05	<0.001	66201.1	0.79	0.007	0.007	1.6e-05	0.3039
Self Report	Moderate PA	%TBF	rs1362735	7	133398605	A	G	360912	0.654	0.011	0.002	6.12e-05	<0.001	55139.9	0.343	-0.009	0.006	3.43e-05	0.1691
Self Report	Moderate PA	%TBF	rs17473484	5	114915460	T	C	360912	0.951	0.026	0.005	6.49e-05	<0.001	70415.8	0.05	0	0.013	2.06e-08	0.9696
Self Report	Moderate PA	%TBF	rs1800497	11	113270828	G	A	360912	0.798	-0.014	0.003	6.58e-05	<0.001	74332.9	0.785	-0.007	0.007	1.27e-05	0.3318
Self Report	Moderate PA	%TBF	rs1941599	11	76433754	A	G	360912	0.696	0.013	0.003	6.78e-05	<0.001	72128.5	0.317	-0.001	0.007	2.17e-07	0.9005
Self Report	Moderate PA	%TBF	rs2041786	16	50539323	A	G	360912	0.844	0.015	0.003	6.49e-05	<0.001	75084.1	0.153	0.005	0.008	5.99e-06	0.5023
Self Report	Moderate PA	%TBF	rs4556752	15	37940886	C	T	360912	0.921	-0.02	0.004	6.23e-05	<0.001	55889.7	0.931	0.009	0.013	8.75e-06	0.4844
Self Report	Moderate PA	%TBF	rs4895842	6	129349539	T	C	360912	0.315	-0.011	0.002	5.96e-05	<0.001	76116	0.692	0.004	0.006	5.94e-06	0.5013
Self Report	Moderate PA	%TBF	rs6137790	20	2346200	G	A	360912	0.556	0.011	0.002	6.01e-05	<0.001	73585.6	0.566	0.002	0.006	9.75e-07	0.7888
Self Report	Moderate PA	%TBF	rs6545389	2	54386901	A	G	360912	0.5	-0.013	0.002	8.43e-05	<0.001	74182.4	0.541	0.002	0.006	1.77e-06	0.7173
Self Report	Moderate PA	%TBF	rs6950425	7	92506072	A	C	360912	0.961	-0.028	0.006	6.35e-05	<0.001	71347.3	0.079	-0.015	0.014	1.5e-05	0.3006
Self Report	Moderate PA	%TBF	rs7697278	4	66243126	C	T	360912	0.43	-0.011	0.002	6.49e-05	<0.001	75523.2	0.42	-0.01	0.006	4.03e-05	0.0809
Self Report	Moderate PA	%TBF	rs8070414	17	63428940	T	G	360912	0.89	0.018	0.004	6.97e-05	<0.001	74893.7	0.154	-0.003	0.008	1.96e-06	0.7019
Self Report	Moderate PA	%TBF	rs918113	12	68212630	G	A	360912	0.842	0.015	0.003	6.63e-05	<0.001	75839.1	0.825	0.002	0.007	1.63e-06	0.7248
Self Report	Moderate PA	%TBF	rs9570029	13	59621634	A	G	360912	0.901	-0.018	0.004	5.85e-05	<0.001	72711.3	0.1	-0.004	0.009	2.06e-06	0.6987
Self Report	Moderate PA	%TBF	rs960117	12	46613819	C	T	360912	0.188	-0.014	0.003	6.58e-05	<0.001	76128.9	0.186	-0.009	0.007	1.93e-05	0.2258
Self Report	Moderate-to-Vigorous PA	%TBF	rs10041140	5	51378177	A	T	377234	0.733	0.012	0.003	6.47e-05	<0.001	73868.2	0.76	-0.002	0.007	1.83e-06	0.7131
Self Report	Moderate-to-Vigorous PA	%TBF	rs10145335	14	98547748	G	A	377234	0.749	-0.014	0.003	8.2e-05	<0.001	75694.8	0.786	-0.003	0.006	2.28e-06	0.6779
Self Report	Moderate-to-Vigorous PA	%TBF	rs10157145	1	205261963	T	C	377234	0.496	-0.012	0.002	7.55e-05	<0.001	73845	0.524	-0.005	0.006	1.13e-05	0.3616
Self Report	Moderate-to-Vigorous PA	%TBF	rs10263128	7	50233535	C	T	377234	0.412	-0.014	0.002	0.000102	<0.001	74340.4	0.436	0.006	0.006	1.55e-05	0.2834
Self Report	Moderate-to-Vigorous PA	%TBF	rs1043595	7	128410012	G	A	377234	0.717	0.014	0.002	9.15e-05	<0.001	76128.3	0.75	0.004	0.007	4.68e-06	0.5505
Self Report	Moderate-to-Vigorous PA	%TBF	rs10506671	12	75522128	G	A	377234	0.911	-0.019	0.004	6.55e-05	<0.001	76135.4	0.88	-0.002	0.009	4e-07	0.8615
Self Report	Moderate-to-Vigorous PA	%TBF	rs10973183	9	37066231	T	C	377234	0.462	0.013	0.002	9.06e-05	<0.001	76058.3	0.543	-0.003	0.005	3.53e-06	0.6041
Self Report	Moderate-to-Vigorous PA	%TBF	rs11048486	12	26524796	C	A	377234	0.835	0.014	0.003	5.73e-05	<0.001	47177.4	0.959	-0.035	0.024	4.66e-05	0.1381
Self Report	Moderate-to-Vigorous PA	%TBF	rs11081859	18	31926289	G	A	377234	0.108	0.018	0.004	7.15e-05	<0.001	73062.1	0.155	0.013	0.008	3.54e-05	0.1079
Self Report	Moderate-to-Vigorous PA	%TBF	rs11191275	10	104142800	C	T	377234	0.866	-0.015	0.003	6.02e-05	<0.001	72898.3	0.859	0.003	0.008	1.49e-06	0.742
Self Report	Moderate-to-Vigorous PA	%TBF	rs11628318	14	103040087	T	A	377234	0.25	-0.012	0.003	6.11e-05	<0.001	74341.7	0.267	0.003	0.006	3.15e-06	0.6285
Self Report	Moderate-to-Vigorous PA	%TBF	rs1186721	7	34974602	G	A	377234	0.684	-0.013	0.002	7.95e-05	<0.001	76126.5	0.696	-0.005	0.006	9.44e-06	0.3967
Self Report	Moderate-to-Vigorous PA	%TBF	rs12912808	15	95292223	C	T	377234	0.851	0.018	0.003	8.44e-05	<0.001	73858.1	0.85	-0.001	0.008	1.88e-07	0.9063
Self Report	Moderate-to-Vigorous PA	%TBF	rs1296135	5	154922981	G	T	377234	0.068	-0.023	0.004	7.29e-05	<0.001	62772.3	0.065	-0.008	0.012	7.86e-06	0.4824
Self Report	Moderate-to-Vigorous PA	%TBF	rs12979056	19	17862131	G	A	377234	0.542	-0.01	0.002	5.93e-05	<0.001	73709.4	0.534	0.001	0.006	4.72e-07	0.8521
Self Report	Moderate-to-Vigorous PA	%TBF	rs13252533	8	104814032	A	G	377234	0.805	0.015	0.003	7.87e-05	<0.001	72537.5	0.197	-0.008	0.007	1.94e-05	0.2357
Self Report	Moderate-to-Vigorous PA	%TBF	rs1340704	13	76506657	C	T	377234	0.402	0.01	0.002	5.56e-05	<0.001	74329.3	0.426	0.004	0.006	5.07e-06	0.5392
Self Report	Moderate-to-Vigorous PA	%TBF	rs1443918	13	54034124	A	T	377234	0.382	-0.013	0.002	8.31e-05	<0.001	76091.3	0.382	-0.01	0.006	4e-05	0.0809
Self Report	Moderate-to-Vigorous PA	%TBF	rs17053454	13	57281368	G	A	377234	0.66	0.011	0.002	5.66e-05	<0.001	53358	0.662	0.004	0.007	7.15e-06	0.5368
Self Report	Moderate-to-Vigorous PA	%TBF	rs17183317	4	171734020	A	G	377234	0.937	-0.022	0.005	5.97e-05	<0.001	62006	0.086	0.008	0.012	7.73e-06	0.4887
Self Report	Moderate-to-Vigorous PA	%TBF	rs1731951	7	137075847	T	A	377234	0.556	-0.01	0.002	5.62e-05	<0.001	76117.4	0.554	0.009	0.006	3.76e-05	0.0908
Self Report	Moderate-to-Vigorous PA	%TBF	rs17573850	13	44885589	A	G	377234	0.741	0.012	0.003	6.08e-05	<0.001	75814.2	0.238	-0.008	0.006	1.92e-05	0.2277
Self Report	Moderate-to-Vigorous PA	%TBF	rs17818431	22	20052420	G	A	377234	0.839	0.015	0.003	6.47e-05	<0.001	71723.1	0.829	-0.006	0.008	1.05e-05	0.3861
Self Report	Moderate-to-Vigorous PA	%TBF	rs1921981	21	42422547	G	A	377234	0.674	0.013	0.002	8.03e-05	<0.001	72557.1	0.698	-0.005	0.006	8.26e-06	0.4388
Self Report	Moderate-to-Vigorous PA	%TBF	rs1955896	14	99197274	A	G	377234	0.538	-0.01	0.002	5.67e-05	<0.001	75806.2	0.448	0.011	0.006	5.18e-05	0.0475
Self Report	Moderate-to-Vigorous PA	%TBF	rs2035562	3	85056521	A	G	377234	0.328	-0.014	0.002	9.2e-05	<0.001	76086.5	0.638	0.003	0.006	4.41e-06	0.5626
Self Report	Moderate-to-Vigorous PA	%TBF	rs2148201	10	2323505	G	A	377234	0.509	-0.011	0.002	6.08e-05	<0.001	76082.5	0.529	-0.001	0.006	4.19e-07	0.8583
Self Report	Moderate-to-Vigorous PA	%TBF	rs2240883	16	3645909	G	C	377234	0.987	-0.045	0.01	5.54e-05	<0.001	80524	0.956	0.004	0.019	5.91e-07	0.8273
Self Report	Moderate-to-Vigorous PA	%TBF	rs2267443	22	42287454	A	G	377234	0.381	0.011	0.002	5.73e-05	<0.001	73226.3	0.6	0.001	0.006	3.18e-07	0.8788
Self Report	Moderate-to-Vigorous PA	%TBF	rs2267549	12	4771682	G	A	377234	0.546	0.011	0.002	5.83e-05	<0.001	73706.2	0.557	0.001	0.006	3.27e-07	0.8767
Self Report	Moderate-to-Vigorous PA	%TBF	rs2283249	11	17824372	T	G	377234	0.752	-0.013	0.003	6.3e-05	<0.001	74339.9	0.268	0	0.006	1.4e-08	0.9743
Self Report	Moderate-to-Vigorous PA	%TBF	rs2388195	6	98283960	A	C	377234	0.561	-0.012	0.002	7.26e-05	<0.001	75652.2	0.454	0.004	0.005	9.18e-06	0.4047
Self Report	Moderate-to-Vigorous PA	%TBF	rs2638463	12	89669785	G	A	377234	0.694	-0.012	0.003	5.57e-05	<0.001	75857.8	0.683	0.002	0.006	1.09e-06	0.7732
Self Report	Moderate-to-Vigorous PA	%TBF	rs2710477	2	210508116	T	A	377234	0.919	-0.021	0.004	6.89e-05	<0.001	74341.8	0.84	0.008	0.009	1.15e-05	0.3555
Self Report	Moderate-to-Vigorous PA	%TBF	rs293566	20	31097877	T	C	377234	0.669	-0.011	0.002	5.86e-05	<0.001	76053.9	0.356	0.003	0.006	3.76e-06	0.593
Self Report	Moderate-to-Vigorous PA	%TBF	rs2942127	1	204420067	G	A	377234	0.175	0.016	0.003	8.1e-05	<0.001	76112.6	0.23	-0.002	0.007	7.72e-07	0.8085
Self Report	Moderate-to-Vigorous PA	%TBF	rs3936938	1	181031797	G	A	377234	0.403	-0.011	0.002	6.11e-05	<0.001	60484.9	0.384	-0.009	0.006	3.6e-05	0.1401
Self Report	Moderate-to-Vigorous PA	%TBF	rs4281659	15	61844443	T	C	377234	0.865	0.017	0.003	7.53e-05	<0.001	73141.5	0.15	0.014	0.008	4.2e-05	0.0796
Self Report	Moderate-to-Vigorous PA	%TBF	rs4375758	18	49587092	G	A	377234	0.875	0.016	0.003	5.86e-05	<0.001	72605.3	0.865	-0.011	0.008	2.73e-05	0.1593
Self Report	Moderate-to-Vigorous PA	%TBF	rs4518438	5	88157552	T	C	377234	0.49	-0.011	0.002	6.97e-05	<0.001	76083	0.498	0.004	0.005	7.95e-06	0.4367
Self Report	Moderate-to-Vigorous PA	%TBF	rs466727	20	15626740	G	C	377234	0.329	0.011	0.002	5.77e-05	<0.001	73581.5	0.333	-0.009	0.006	2.92e-05	0.1425
Self Report	Moderate-to-Vigorous PA	%TBF	rs4787924	16	24264538	G	A	377234	0.475	-0.011	0.002	6.41e-05	<0.001	74669.5	0.469	0.001	0.005	7.76e-07	0.8098
Self Report	Moderate-to-Vigorous PA	%TBF	rs4886868	15	74353561	T	G	377234	0.414	-0.012	0.002	8.07e-05	<0.001	70526.2	0.595	0.007	0.006	1.75e-05	0.2665
Self Report	Moderate-to-Vigorous PA	%TBF	rs4947350	6	32767620	T	C	377234	0.8	0.017	0.003	0.000105	<0.001	75215	0.197	NA	0.007	0	1
Self Report	Moderate-to-Vigorous PA	%TBF	rs5755125	22	34993396	C	G	377234	0.216	0.013	0.003	6.48e-05	<0.001	74285.2	0.214	-0.008	0.007	1.93e-05	0.2313
Self Report	Moderate-to-Vigorous PA	%TBF	rs662638	11	57686764	T	C	377234	0.444	0.012	0.002	7.4e-05	<0.001	76109.1	0.582	-0.006	0.005	1.9e-05	0.2287
Self Report	Moderate-to-Vigorous PA	%TBF	rs6743932	2	35005351	G	A	377234	0.803	-0.013	0.003	5.62e-05	<0.001	73263	0.806	0.009	0.007	2.16e-05	0.2087
Self Report	Moderate-to-Vigorous PA	%TBF	rs6812265	4	139726791	C	T	377234	0.548	0.011	0.002	6.92e-05	<0.001	71841.6	0.559	-0.006	0.006	1.3e-05	0.3343
Self Report	Moderate-to-Vigorous PA	%TBF	rs6819429	4	159861907	T	C	377234	0.341	0.013	0.002	8.03e-05	<0.001	76102.8	0.678	-0.001	0.006	3.91e-07	0.8631
Self Report	Moderate-to-Vigorous PA	%TBF	rs710187	22	38204089	C	T	377234	0.442	0.01	0.002	5.95e-05	<0.001	75450.4	0.44	0.003	0.006	4.21e-06	0.573
Self Report	Moderate-to-Vigorous PA	%TBF	rs7188855	16	52469602	A	T	377234	0.556	0.012	0.002	7.2e-05	<0.001	76079.6	0.548	0	0.005	4.06e-08	0.9557
Self Report	Moderate-to-Vigorous PA	%TBF	rs719263	22	49685455	T	C	377234	0.195	-0.013	0.003	5.83e-05	<0.001	69384.2	0.785	0.008	0.007	2.03e-05	0.2357
Self Report	Moderate-to-Vigorous PA	%TBF	rs7233752	18	67399208	A	G	377234	0.805	0.013	0.003	5.67e-05	<0.001	75516.8	0.198	0.003	0.007	2.31e-06	0.676
Self Report	Moderate-to-Vigorous PA	%TBF	rs749256	1	156884365	T	C	377234	0.25	0.013	0.003	6.85e-05	<0.001	2895.97	0.755	-0.007	0.033	1.4e-05	0.8405
Self Report	Moderate-to-Vigorous PA	%TBF	rs7508365	19	13151477	T	C	377234	0.28	-0.011	0.002	5.7e-05	<0.001	57375.3	0.731	-0.007	0.008	1.61e-05	0.3368
Self Report	Moderate-to-Vigorous PA	%TBF	rs7521047	1	154076366	T	C	377234	0.46	0.012	0.002	7.59e-05	<0.001	98363.8	0.515	0.006	0.005	1.38e-05	0.2438
Self Report	Moderate-to-Vigorous PA	%TBF	rs7648547	3	41188000	A	C	377234	0.461	-0.012	0.002	7.55e-05	<0.001	75908.6	0.547	0.002	0.006	1.51e-06	0.7346
Self Report	Moderate-to-Vigorous PA	%TBF	rs7652008	3	127160434	T	C	377234	0.537	-0.011	0.002	6.11e-05	<0.001	75599.8	0.447	-0.001	0.005	5.49e-07	0.8386
Self Report	Moderate-to-Vigorous PA	%TBF	rs768023	6	108876002	G	A	377234	0.373	0.011	0.002	6.43e-05	<0.001	100661	0.399	-0.01	0.005	4.61e-05	0.0312
Self Report	Moderate-to-Vigorous PA	%TBF	rs7690846	4	113988045	T	C	377234	0.484	0.01	0.002	5.84e-05	<0.001	74941	0.505	0.001	0.006	3.97e-07	0.8631
Self Report	Moderate-to-Vigorous PA	%TBF	rs7760670	6	73190006	C	T	377234	0.704	0.013	0.002	7.23e-05	<0.001	76122.2	0.709	-0.002	0.006	8.49e-07	0.7993
Self Report	Moderate-to-Vigorous PA	%TBF	rs7804463	7	133447651	T	C	377234	0.53	0.015	0.002	0.000122	<0.001	74341.1	0.472	-0.006	0.005	1.72e-05	0.2586
Self Report	Moderate-to-Vigorous PA	%TBF	rs8019978	14	55557284	G	A	377234	0.558	0.01	0.002	5.61e-05	<0.001	75635.4	0.548	0.002	0.005	2.61e-06	0.6567
Self Report	Moderate-to-Vigorous PA	%TBF	rs8058726	16	83207316	A	T	377234	0.712	-0.011	0.002	5.84e-05	<0.001	76124.2	0.69	-0.008	0.006	2.35e-05	0.1806
Self Report	Moderate-to-Vigorous PA	%TBF	rs9513912	13	102187073	A	G	377234	0.962	-0.027	0.006	5.61e-05	<0.001	61867.6	0.047	0.006	0.015	2.8e-06	0.6773
Self Report	Moderate-to-Vigorous PA	%TBF	rs9584870	13	99245866	T	C	377234	0.633	-0.011	0.002	5.9e-05	<0.001	74336.9	0.368	0.002	0.006	1.98e-06	0.7015
Self Report	Moderate-to-Vigorous PA	%TBF	rs974471	14	29685328	G	A	377234	0.229	0.014	0.003	7.13e-05	<0.001	76076.9	0.251	-0.013	0.006	5.96e-05	0.0333
Self Report	Moderate-to-Vigorous PA	%TBF	rs9919769	12	126827971	A	G	377234	0.774	-0.012	0.003	5.88e-05	<0.001	66227.8	0.228	0	0.007	1.31e-08	0.9765
Self Report	Moderate-to-Vigorous PA	%TBF	rs997467	2	199182704	T	C	377234	0.428	-0.012	0.002	7.08e-05	<0.001	74336.6	0.591	-0.012	0.006	6.37e-05	0.0296
Self Report	Vigorous PA	%TBF	rs11153258	6	111222552	C	T	261055	0.801	-0.008	0.002	5.64e-05	<0.001	74546.1	0.765	0	0.007	2.78e-08	0.9637
Self Report	Vigorous PA	%TBF	rs11643648	16	78514583	C	T	261055	0.926	-0.012	0.003	6.11e-05	<0.001	72982.7	0.913	-0.001	0.01	8.42e-08	0.9375
Self Report	Vigorous PA	%TBF	rs12059540	1	154845256	T	G	261055	0.971	-0.019	0.004	6.22e-05	<0.001	64306.9	0.037	0.027	0.017	4.1e-05	0.1046
Self Report	Vigorous PA	%TBF	rs12480549	20	14148547	G	A	261055	0.806	-0.008	0.002	5.73e-05	<0.001	74340.9	0.793	-0.007	0.007	1.39e-05	0.3102
Self Report	Vigorous PA	%TBF	rs1248860	3	85015779	G	A	261055	0.484	-0.01	0.001	0.000146	<0.001	75628.2	0.486	0.002	0.005	1.64e-06	0.7249
Self Report	Vigorous PA	%TBF	rs13118259	4	139038611	G	C	261055	0.085	0.011	0.002	5.97e-05	<0.001	73484.5	0.079	-0.011	0.01	1.52e-05	0.2902
Self Report	Vigorous PA	%TBF	rs13174601	5	51238100	T	C	261055	0.93	-0.013	0.003	6.18e-05	<0.001	46434.4	0.04	-0.014	0.026	6.56e-06	0.5811
Self Report	Vigorous PA	%TBF	rs13243553	7	133506955	G	A	261055	0.608	0.009	0.001	0.000112	<0.001	76123.3	0.586	-0.007	0.005	2.4e-05	0.1764
Self Report	Vigorous PA	%TBF	rs13252533	8	104814032	A	G	261055	0.806	0.008	0.002	5.67e-05	<0.001	72537.5	0.197	-0.008	0.007	1.94e-05	0.2357
Self Report	Vigorous PA	%TBF	rs13375273	1	181819083	G	A	261055	0.677	-0.007	0.001	5.95e-05	<0.001	74338	0.656	-0.006	0.006	1.39e-05	0.3092
Self Report	Vigorous PA	%TBF	rs17219084	16	53855600	A	G	261055	0.624	-0.006	0.001	5.76e-05	<0.001	100682	0.352	0.002	0.005	1.1e-06	0.7395
Self Report	Vigorous PA	%TBF	rs17597778	4	162902865	T	G	261055	0.888	0.01	0.002	5.73e-05	<0.001	76119.6	0.106	0.002	0.009	7.48e-07	0.8114
Self Report	Vigorous PA	%TBF	rs1774859	1	117872697	C	T	261055	0.635	-0.006	0.001	5.9e-05	<0.001	55212.9	0.621	-0.007	0.006	2.23e-05	0.2673
Self Report	Vigorous PA	%TBF	rs2253310	6	108888593	C	G	261055	0.374	0.009	0.001	0.000113	<0.001	76082.2	0.396	0.006	0.006	1.36e-05	0.3086
Self Report	Vigorous PA	%TBF	rs2663648	2	210491839	C	T	261055	0.884	-0.011	0.002	7.17e-05	<0.001	76092.3	0.828	0.007	0.008	9.74e-06	0.3894
Self Report	Vigorous PA	%TBF	rs2922754	2	225909316	G	A	261055	0.242	0.007	0.002	5.95e-05	<0.001	74334.8	0.233	-0.011	0.006	3.76e-05	0.0945
Self Report	Vigorous PA	%TBF	rs328902	7	35020843	C	T	261055	0.685	-0.009	0.001	0.000102	<0.001	76131.5	0.697	-0.004	0.006	6.25e-06	0.4904
Self Report	Vigorous PA	%TBF	rs3781411	10	126715436	C	T	261055	0.876	0.013	0.002	0.000105	<0.001	98636.1	0.86	0.008	0.007	1.54e-05	0.2181
Self Report	Vigorous PA	%TBF	rs4375758	18	49587092	G	A	261055	0.875	0.01	0.002	7.17e-05	<0.001	72605.3	0.865	-0.011	0.008	2.73e-05	0.1593
Self Report	Vigorous PA	%TBF	rs4556111	8	113382838	T	C	261055	0.466	-0.007	0.001	7.15e-05	<0.001	75640.3	0.543	-0.007	0.005	2.48e-05	0.1706
Self Report	Vigorous PA	%TBF	rs5742915	15	74336633	T	C	261055	0.539	-0.007	0.001	6.68e-05	<0.001	95656.2	0.444	0.004	0.005	5.22e-06	0.4796
Self Report	Vigorous PA	%TBF	rs577525	10	99769388	T	C	261055	0.437	0.006	0.001	6e-05	<0.001	75618.4	0.532	-0.006	0.005	1.74e-05	0.2509
Self Report	Vigorous PA	%TBF	rs608410	1	88770663	T	C	261055	0.275	0.007	0.001	6.26e-05	<0.001	75604.8	0.717	0.003	0.006	2.68e-06	0.6527
Self Report	Vigorous PA	%TBF	rs6562062	13	60503637	G	A	261055	0.372	-0.006	0.001	5.76e-05	<0.001	56998.2	0.391	-0.002	0.006	1.71e-06	0.7547
Self Report	Vigorous PA	%TBF	rs6689056	1	24364531	G	A	261055	0.674	0.008	0.001	7.75e-05	<0.001	68273	0.658	-0.002	0.006	2.23e-06	0.6961
Self Report	Vigorous PA	%TBF	rs6912002	6	32765268	T	C	261055	0.673	0.008	0.001	8.47e-05	<0.001	100651	0.354	-0.008	0.005	2.79e-05	0.0938
Self Report	Vigorous PA	%TBF	rs7160630	14	98637479	A	G	261055	0.792	-0.009	0.002	7.55e-05	<0.001	75224.7	0.198	-0.012	0.007	4.12e-05	0.0782
Self Report	Vigorous PA	%TBF	rs7715147	5	60053220	C	A	261055	0.758	-0.007	0.002	5.57e-05	<0.001	59593.3	0.737	0.007	0.008	1.55e-05	0.3365
Self Report	Vigorous PA	%TBF	rs7749938	6	10362511	C	T	261055	0.985	0.026	0.006	5.83e-05	<0.001	69964.8	0.928	0.013	0.017	8.27e-06	0.447
Self Report	Vigorous PA	%TBF	rs8142972	22	41084530	T	C	261055	0.859	-0.01	0.002	6.78e-05	<0.001	76110.1	0.156	-0.005	0.008	6.63e-06	0.4774
Self Report	Vigorous PA	%TBF	rs920447	11	116108902	G	A	261055	0.814	0.009	0.002	6.82e-05	<0.001	73138.1	0.828	-0.004	0.007	5.34e-06	0.532
Self Report	Vigorous PA	%TBF	rs9324424	8	136900266	G	A	261055	0.741	0.007	0.001	6.35e-05	<0.001	76124.1	0.7	0.001	0.006	1.85e-07	0.9056
Self Report	Vigorous PA	%TBF	rs9387216	6	97729953	C	A	261055	0.748	-0.008	0.002	7.17e-05	<0.001	74340.7	0.711	0.01	0.006	3.64e-05	0.0999
Self Report	Strenuous Sports & Other Exercises	%TBF	rs10225928	7	85802734	A	G	350492	0.199	0.007	0.001	6e-05	<0.001	74340.8	0.763	0.001	0.007	2.43e-07	0.8931
Self Report	Strenuous Sports & Other Exercises	%TBF	rs10821729	10	62099173	C	T	350492	0.49	-0.005	0.001	5.68e-05	<0.001	76090.6	0.473	0.009	0.005	3.9e-05	0.085
Self Report	Strenuous Sports & Other Exercises	%TBF	rs10879547	12	73497463	C	T	350492	0.756	-0.006	0.001	5.7e-05	<0.001	76093.2	0.738	-0.002	0.006	1.56e-06	0.7306
Self Report	Strenuous Sports & Other Exercises	%TBF	rs11000785	10	75575963	T	C	350492	0.284	0.006	0.001	7.04e-05	<0.001	2896	0.701	0.012	0.03	6.16e-05	0.6728
Self Report	Strenuous Sports & Other Exercises	%TBF	rs11210230	1	73860239	T	C	350492	0.881	-0.009	0.002	7.4e-05	<0.001	66199.6	0.121	0.002	0.009	9.44e-07	0.8026
Self Report	Strenuous Sports & Other Exercises	%TBF	rs11625806	14	37022739	G	A	350492	0.592	-0.006	0.001	6.55e-05	<0.001	76130	0.615	-0.001	0.006	8.51e-07	0.7991
Self Report	Strenuous Sports & Other Exercises	%TBF	rs11934368	4	178899883	A	C	350492	0.728	0.006	0.001	5.86e-05	<0.001	73852.4	0.292	-0.007	0.006	1.68e-05	0.265
Self Report	Strenuous Sports & Other Exercises	%TBF	rs12031924	1	96877405	C	T	350492	0.76	0.006	0.001	6.35e-05	<0.001	76089.6	0.772	-0.006	0.006	1.16e-05	0.3485
Self Report	Strenuous Sports & Other Exercises	%TBF	rs12372334	12	23727824	A	T	350492	0.618	-0.005	0.001	5.71e-05	<0.001	75591.6	0.62	-0.003	0.006	2.96e-06	0.6364
Self Report	Strenuous Sports & Other Exercises	%TBF	rs12477961	2	199495674	A	G	350492	0.418	-0.006	0.001	6.26e-05	<0.001	76081.9	0.575	0.01	0.005	4.88e-05	0.0541
Self Report	Strenuous Sports & Other Exercises	%TBF	rs1265178	6	31161229	G	A	350492	0.762	0.007	0.001	8.12e-05	<0.001	75855.6	0.795	0.001	0.007	1.06e-07	0.9286
Self Report	Strenuous Sports & Other Exercises	%TBF	rs12821008	12	49474605	C	T	350492	0.594	-0.006	0.001	7.29e-05	<0.001	75174.1	0.597	-0.004	0.006	5.81e-06	0.5088
Self Report	Strenuous Sports & Other Exercises	%TBF	rs12973258	19	19488718	T	C	350492	0.816	0.009	0.001	9.27e-05	<0.001	27448	0.182	0.011	0.011	3.81e-05	0.3064
Self Report	Strenuous Sports & Other Exercises	%TBF	rs13207819	6	97971404	G	A	350492	0.765	-0.007	0.001	6.7e-05	<0.001	71721.9	0.765	0.01	0.006	3.17e-05	0.1316
Self Report	Strenuous Sports & Other Exercises	%TBF	rs13284832	9	128435126	A	C	350492	0.571	-0.005	0.001	6e-05	<0.001	76103.4	0.418	0.004	0.006	8.03e-06	0.4343
Self Report	Strenuous Sports & Other Exercises	%TBF	rs1415035	6	69730452	C	T	350492	0.836	0.008	0.002	6.85e-05	<0.001	74238.7	0.814	-0.01	0.007	2.7e-05	0.1566
Self Report	Strenuous Sports & Other Exercises	%TBF	rs1477117	12	109888779	G	A	350492	0.811	0.007	0.001	6.02e-05	<0.001	100679	0.824	-0.008	0.006	1.69e-05	0.1916
Self Report	Strenuous Sports & Other Exercises	%TBF	rs1638525	17	19848594	G	C	350492	0.603	0.008	0.001	0.000114	<0.001	76126.6	0.628	-0.002	0.006	1.57e-06	0.7298
Self Report	Strenuous Sports & Other Exercises	%TBF	rs17062635	5	163375485	G	A	350492	0.546	-0.006	0.001	6.5e-05	<0.001	74341	0.545	0	0.006	7.12e-08	0.942
Self Report	Strenuous Sports & Other Exercises	%TBF	rs17145573	11	56969455	G	A	350492	0.89	-0.009	0.002	6.54e-05	<0.001	73333.9	0.891	-0.007	0.009	8.01e-06	0.4433
Self Report	Strenuous Sports & Other Exercises	%TBF	rs173946	5	60488297	T	C	350492	0.605	-0.007	0.001	9.73e-05	<0.001	74340.6	0.4	0.003	0.006	4.12e-06	0.5799
Self Report	Strenuous Sports & Other Exercises	%TBF	rs17565975	11	111586950	G	A	350492	0.437	0.005	0.001	5.77e-05	<0.001	74667.7	0.46	-0.006	0.006	1.64e-05	0.2682
Self Report	Strenuous Sports & Other Exercises	%TBF	rs17599450	19	30328753	C	T	350492	0.678	0.006	0.001	6.18e-05	<0.001	74338.9	0.686	-0.004	0.006	7.32e-06	0.4607
Self Report	Strenuous Sports & Other Exercises	%TBF	rs1932202	9	75970379	C	T	350492	0.752	0.007	0.001	6.86e-05	<0.001	68466.3	0.763	-0.005	0.007	9.21e-06	0.4271
Self Report	Strenuous Sports & Other Exercises	%TBF	rs2148201	10	2323505	G	A	350492	0.508	-0.006	0.001	6.81e-05	<0.001	76082.5	0.529	-0.001	0.006	4.19e-07	0.8583
Self Report	Strenuous Sports & Other Exercises	%TBF	rs2156044	18	33388938	G	C	350492	0.656	-0.006	0.001	5.79e-05	<0.001	76130.8	0.651	-0.001	0.006	1.45e-07	0.9162
Self Report	Strenuous Sports & Other Exercises	%TBF	rs216211	17	2242417	A	G	350492	0.248	0.007	0.001	6.75e-05	<0.001	2895.95	0.74	0.004	0.032	4.21e-06	0.9121
Self Report	Strenuous Sports & Other Exercises	%TBF	rs2238046	12	2299998	A	C	350492	0.612	-0.006	0.001	6.5e-05	<0.001	74340.7	0.376	0.007	0.006	2.1e-05	0.2113
Self Report	Strenuous Sports & Other Exercises	%TBF	rs2278480	3	25635743	T	C	350492	0.713	-0.006	0.001	5.71e-05	<0.001	76104.2	0.314	0.009	0.006	2.92e-05	0.1358
Self Report	Strenuous Sports & Other Exercises	%TBF	rs246743	7	140690009	T	G	350492	0.147	0.008	0.002	6.66e-05	<0.001	55522.1	0.844	-0.008	0.009	1.56e-05	0.3523
Self Report	Strenuous Sports & Other Exercises	%TBF	rs2470893	15	75019449	C	T	350492	0.67	0.006	0.001	7.84e-05	<0.001	87730.1	0.693	0	0.006	5.3e-09	0.9828
Self Report	Strenuous Sports & Other Exercises	%TBF	rs2668196	3	165502709	A	T	350492	0.192	-0.007	0.001	6.4e-05	<0.001	59129	0.202	0.012	0.008	3.68e-05	0.1404
Self Report	Strenuous Sports & Other Exercises	%TBF	rs2725371	8	30854033	A	G	350492	0.304	-0.007	0.001	7.48e-05	<0.001	9683	0.716	0.001	0.018	4.55e-07	0.9471
Self Report	Strenuous Sports & Other Exercises	%TBF	rs2821549	1	111184045	G	C	350492	0.721	0.006	0.001	6.26e-05	<0.001	76077.6	0.708	0.004	0.006	4.39e-06	0.5632
Self Report	Strenuous Sports & Other Exercises	%TBF	rs2871340	2	100884117	G	T	350492	0.503	-0.006	0.001	7.48e-05	<0.001	76073.8	0.508	0.011	0.005	5.26e-05	0.0455
Self Report	Strenuous Sports & Other Exercises	%TBF	rs288070	2	210408477	G	A	350492	0.902	-0.011	0.002	8.38e-05	<0.001	626.003	0.882	-0.016	0.087	5.51e-05	0.853
Self Report	Strenuous Sports & Other Exercises	%TBF	rs3129334	4	3368526	T	C	350492	0.403	0.006	0.001	7.44e-05	<0.001	73342.7	0.611	-0.005	0.006	1.22e-05	0.3439
Self Report	Strenuous Sports & Other Exercises	%TBF	rs354364	6	66304163	T	C	350492	0.75	-0.006	0.001	5.57e-05	<0.001	74339.3	0.254	-0.002	0.006	1.54e-06	0.7348
Self Report	Strenuous Sports & Other Exercises	%TBF	rs3733876	5	176382995	G	A	350492	0.814	0.007	0.001	6.54e-05	<0.001	100710	0.822	0.006	0.006	1.03e-05	0.3077
Self Report	Strenuous Sports & Other Exercises	%TBF	rs3771544	2	69771484	C	T	350492	0.608	-0.006	0.001	6.11e-05	<0.001	76099.5	0.595	-0.01	0.006	4.17e-05	0.0748
Self Report	Strenuous Sports & Other Exercises	%TBF	rs4084828	2	118893347	C	T	350492	0.463	-0.006	0.001	6.76e-05	<0.001	55238.7	0.466	-0.006	0.007	1.09e-05	0.4385
Self Report	Strenuous Sports & Other Exercises	%TBF	rs4411372	13	99130423	T	C	350492	0.72	-0.007	0.001	8.36e-05	<0.001	76114.1	0.277	0.013	0.006	5.99e-05	0.0327
Self Report	Strenuous Sports & Other Exercises	%TBF	rs4432322	18	22689878	T	C	350492	0.359	-0.005	0.001	5.63e-05	<0.001	74065.1	0.659	0	0.006	3.64e-09	0.9869
Self Report	Strenuous Sports & Other Exercises	%TBF	rs4601350	8	113329886	C	T	350492	0.451	-0.006	0.001	6.3e-05	<0.001	76127.5	0.43	-0.008	0.005	2.67e-05	0.1539
Self Report	Strenuous Sports & Other Exercises	%TBF	rs4658403	1	243832560	C	T	350492	0.166	-0.008	0.002	6.76e-05	<0.001	75584.1	0.186	0.002	0.007	5.74e-07	0.835
Self Report	Strenuous Sports & Other Exercises	%TBF	rs4743038	9	109645987	A	T	350492	0.802	0.007	0.001	5.7e-05	<0.001	76093.8	0.789	-0.005	0.006	6.87e-06	0.4696
Self Report	Strenuous Sports & Other Exercises	%TBF	rs4799	2	10933249	C	T	350492	0.521	0.006	0.001	6.77e-05	<0.001	76129.1	0.526	-0.008	0.005	2.77e-05	0.1463
Self Report	Strenuous Sports & Other Exercises	%TBF	rs4811141	20	49851464	G	A	350492	0.127	-0.008	0.002	6.57e-05	<0.001	31486	0.131	0.005	0.013	4.51e-06	0.7062
Self Report	Strenuous Sports & Other Exercises	%TBF	rs4865667	5	50748173	C	T	350492	0.613	0.007	0.001	8.72e-05	<0.001	76095.9	0.614	-0.005	0.006	1.17e-05	0.3444
Self Report	Strenuous Sports & Other Exercises	%TBF	rs4890829	18	74540433	C	T	350492	0.362	-0.006	0.001	6.22e-05	<0.001	76093.4	0.352	-0.004	0.006	7.75e-06	0.4426
Self Report	Strenuous Sports & Other Exercises	%TBF	rs4899284	14	69650845	A	G	350492	0.355	0.007	0.001	8.58e-05	<0.001	66227.8	0.644	0.001	0.006	8.22e-07	0.8155
Self Report	Strenuous Sports & Other Exercises	%TBF	rs4900442	14	100158241	C	T	350492	0.539	-0.005	0.001	6.26e-05	<0.001	74337.9	0.524	-0.001	0.006	2.65e-07	0.8884
Self Report	Strenuous Sports & Other Exercises	%TBF	rs526231	5	102681381	C	T	350492	0.672	-0.006	0.001	5.95e-05	<0.001	74323.7	0.69	0.001	0.006	1.35e-07	0.9203
Self Report	Strenuous Sports & Other Exercises	%TBF	rs577525	10	99769388	T	C	350492	0.437	0.006	0.001	7.02e-05	<0.001	75618.4	0.532	-0.006	0.005	1.74e-05	0.2509
Self Report	Strenuous Sports & Other Exercises	%TBF	rs7002919	8	15874907	C	G	350492	0.918	-0.01	0.002	5.9e-05	<0.001	75818.5	0.92	0.003	0.01	1.35e-06	0.7487
Self Report	Strenuous Sports & Other Exercises	%TBF	rs7034243	9	122688811	A	G	350492	0.659	-0.006	0.001	7.53e-05	<0.001	74534.9	0.353	0.004	0.006	6.71e-06	0.4796
Self Report	Strenuous Sports & Other Exercises	%TBF	rs705692	1	7480217	C	T	350492	0.108	-0.009	0.002	6.59e-05	<0.001	73453.2	0.114	-0.001	0.009	3.45e-07	0.8736
Self Report	Strenuous Sports & Other Exercises	%TBF	rs7205420	16	8296948	A	T	350492	0.793	-0.007	0.001	6.3e-05	<0.001	66196.4	0.783	-0.002	0.007	1.32e-06	0.7674
Self Report	Strenuous Sports & Other Exercises	%TBF	rs7228225	18	53529456	A	T	350492	0.415	0.005	0.001	5.86e-05	<0.001	75213.4	0.381	-0.012	0.006	5.32e-05	0.0455
Self Report	Strenuous Sports & Other Exercises	%TBF	rs7588028	2	1119227	G	A	350492	0.607	0.005	0.001	5.68e-05	<0.001	76108.3	0.61	-0.003	0.006	2.95e-06	0.6357
Self Report	Strenuous Sports & Other Exercises	%TBF	rs7607737	2	183728290	C	T	350492	0.883	-0.008	0.002	5.7e-05	<0.001	66192.4	0.876	0.014	0.009	3.69e-05	0.118
Self Report	Strenuous Sports & Other Exercises	%TBF	rs7627864	3	49926613	C	G	350492	0.569	0.007	0.001	8.86e-05	<0.001	76109.9	0.61	0.014	0.006	8.69e-05	0.0101
Self Report	Strenuous Sports & Other Exercises	%TBF	rs763187	6	166955738	A	G	350492	0.171	-0.008	0.002	6.89e-05	<0.001	71073.4	0.835	0.003	0.008	2.61e-06	0.6669
Self Report	Strenuous Sports & Other Exercises	%TBF	rs7718022	5	147941845	G	C	350492	0.487	-0.005	0.001	5.97e-05	<0.001	74184.7	0.494	0.006	0.006	1.4e-05	0.3086
Self Report	Strenuous Sports & Other Exercises	%TBF	rs7740107	6	130374461	T	A	350492	0.264	-0.006	0.001	6.6e-05	<0.001	75827.7	0.26	0.006	0.006	1.23e-05	0.3332
Self Report	Strenuous Sports & Other Exercises	%TBF	rs795980	4	140801666	A	G	350492	0.668	-0.006	0.001	6.35e-05	<0.001	98400.4	0.334	0.007	0.005	1.93e-05	0.1679
Self Report	Strenuous Sports & Other Exercises	%TBF	rs896302	6	98806496	C	T	350492	0.287	0.007	0.001	8.44e-05	<0.001	76061.1	0.286	-0.01	0.006	3.3e-05	0.1133
Self Report	Strenuous Sports & Other Exercises	%TBF	rs9177	7	1787236	A	G	350492	0.51	0.006	0.001	6.75e-05	<0.001	63708	0.458	0.001	0.006	2.93e-07	0.8913
Self Report	Strenuous Sports & Other Exercises	%TBF	rs9293777	5	78661452	C	T	350492	0.653	-0.006	0.001	6.18e-05	<0.001	53359.4	0.726	0	0.007	3.5e-09	0.9891
Self Report	Strenuous Sports & Other Exercises	%TBF	rs9563168	13	54247827	G	A	350492	0.79	-0.007	0.001	6.02e-05	<0.001	75624.2	0.796	0.008	0.007	1.8e-05	0.2433
Self Report	Strenuous Sports & Other Exercises	%TBF	rs9604803	22	18398207	C	A	350492	0.671	0.006	0.001	6.46e-05	<0.001	76098.2	0.664	-0.002	0.006	2.14e-06	0.6866
Self Report	Strenuous Sports & Other Exercises	%TBF	rs968304	1	169094100	T	A	350492	0.411	-0.006	0.001	7.93e-05	<0.001	74053.3	0.418	-0.002	0.006	9.69e-07	0.7888
Self Report	Strenuous Sports & Other Exercises	%TBF	rs9861451	3	85409353	A	G	350492	0.273	0.011	0.001	0.0002	<0.001	76056.2	0.707	0	0.006	9.43e-08	0.9325
Self Report	Strenuous Sports & Other Exercises	%TBF	rs9903845	17	50291181	C	A	350492	0.673	0.006	0.001	6.51e-05	<0.001	76126.7	0.694	0.002	0.006	8.49e-07	0.7993
Self Report	Sedentary Behavior	VAT	rs10041724	5	124273520	T	C	422218	0.808	0.018	0.003	0.000116	<0.001	56908	0.808	0.009	0.002	3.95e-05	<0.001
Self Report	Sedentary Behavior	VAT	rs10054327	5	147871137	G	A	422218	0.576	0.017	0.002	0.000165	<0.001	56908	0.577	0.002	0.002	3.28e-06	0.26
Self Report	Sedentary Behavior	VAT	rs10145592	14	94287215	C	G	422218	0.409	-0.015	0.002	0.00012	<0.001	56908	0.408	-0.003	0.002	7.08e-06	0.098
Self Report	Sedentary Behavior	VAT	rs10189857	2	60713235	A	G	422218	0.568	-0.02	0.002	0.000234	<0.001	56908	0.567	-0.005	0.002	2.31e-05	0.0028
Self Report	Sedentary Behavior	VAT	rs1022785	14	29571653	G	A	422218	0.142	0.018	0.003	8.89e-05	<0.001	56908	0.143	0.006	0.002	1.56e-05	0.014
Self Report	Sedentary Behavior	VAT	rs10234444	7	41828527	G	A	422218	0.823	0.016	0.003	8.17e-05	<0.001	56908	0.823	0.007	0.002	2.61e-05	0.0015
Self Report	Sedentary Behavior	VAT	rs1031423	5	93276883	T	C	422218	0.215	-0.019	0.003	0.000132	<0.001	56908	0.216	0.002	0.002	1.91e-06	0.39
Self Report	Sedentary Behavior	VAT	rs10737620	1	193057971	T	A	422218	0.274	0.014	0.002	9.41e-05	<0.001	56908	0.274	0.006	0.002	2.88e-05	<0.001
Self Report	Sedentary Behavior	VAT	rs10771746	12	30791864	C	T	422218	0.717	-0.014	0.002	9.43e-05	<0.001	56908	0.717	0.002	0.002	3.57e-06	0.24
Self Report	Sedentary Behavior	VAT	rs10772643	12	13415288	C	T	422218	0.108	0.025	0.003	0.000134	<0.001	56908	0.108	0.007	0.003	1.86e-05	0.0073
Self Report	Sedentary Behavior	VAT	rs10786658	10	103737193	A	T	422218	0.414	-0.014	0.002	0.000115	<0.001	56908	0.413	-0.001	0.002	1.41e-06	0.46
Self Report	Sedentary Behavior	VAT	rs10874772	1	93787770	G	A	422218	0.35	0.013	0.002	8.38e-05	<0.001	56908	0.351	0.001	0.002	1.02e-06	0.53
Self Report	Sedentary Behavior	VAT	rs10876864	12	56401085	G	A	422218	0.427	-0.013	0.002	9.91e-05	<0.001	56908	0.425	-0.007	0.002	4.07e-05	<0.001
Self Report	Sedentary Behavior	VAT	rs10890123	1	74802123	C	T	422218	0.77	0.014	0.003	8.1e-05	<0.001	56908	0.771	0.004	0.002	9.52e-06	0.055
Self Report	Sedentary Behavior	VAT	rs10932837	2	221044785	C	T	422218	0.494	-0.013	0.002	9.77e-05	<0.001	56908	0.496	0.002	0.002	3.42e-06	0.25
Self Report	Sedentary Behavior	VAT	rs10994943	10	63591413	T	G	422218	0.581	0.013	0.002	9.32e-05	<0.001	56908	0.582	0.002	0.002	4.44e-06	0.19
Self Report	Sedentary Behavior	VAT	rs11020045	11	92487907	A	C	422218	0.669	-0.013	0.002	8.47e-05	<0.001	56908	0.671	-0.001	0.002	1.35e-06	0.47
Self Report	Sedentary Behavior	VAT	rs11130793	3	60884659	C	T	422218	0.602	0.013	0.002	9.07e-05	<0.001	56908	0.603	0.003	0.002	5.93e-06	0.13
Self Report	Sedentary Behavior	VAT	rs11201422	10	86924483	T	C	422218	0.669	0.013	0.002	8.09e-05	<0.001	56908	0.67	0.003	0.002	6.6e-06	0.11
Self Report	Sedentary Behavior	VAT	rs11218575	11	122154576	C	T	422218	0.566	0.015	0.002	0.000131	<0.001	56908	0.567	0.002	0.002	3.15e-06	0.27
Self Report	Sedentary Behavior	VAT	rs11245482	10	126733546	T	C	422218	0.613	-0.013	0.002	9.41e-05	<0.001	56908	0.614	-0.007	0.002	3.98e-05	<0.001
Self Report	Sedentary Behavior	VAT	rs113584870	11	107243922	G	A	422218	0.824	0.017	0.003	8.54e-05	<0.001	56908	0.826	0.005	0.002	1.26e-05	0.027
Self Report	Sedentary Behavior	VAT	rs114600294	3	181419367	G	C	422218	0.789	-0.016	0.003	0.0001	<0.001	56908	0.792	-0.004	0.002	1.16e-05	0.034
Self Report	Sedentary Behavior	VAT	rs116175338	11	72467875	G	T	422218	0.754	-0.014	0.003	8.54e-05	<0.001	56908	0.756	-0.007	0.002	3.06e-05	<0.001
Self Report	Sedentary Behavior	VAT	rs11689199	2	100820421	A	G	422218	0.598	0.018	0.002	0.000186	<0.001	56908	0.6	0.009	0.002	6.38e-05	<0.001
Self Report	Sedentary Behavior	VAT	rs11714337	3	71582521	G	A	422218	0.569	0.014	0.002	0.000115	<0.001	56908	0.57	0.002	0.002	2.35e-06	0.34
Self Report	Sedentary Behavior	VAT	rs11763734	7	126400910	A	C	422218	0.51	-0.012	0.002	8.82e-05	<0.001	56908	0.512	-0.004	0.002	1.42e-05	0.019
Self Report	Sedentary Behavior	VAT	rs11810109	1	44186812	A	T	422218	0.701	0.016	0.002	0.000126	<0.001	56908	0.703	0.003	0.002	8.8e-06	0.065
Self Report	Sedentary Behavior	VAT	rs11985394	8	92667521	T	A	422218	0.545	0.012	0.002	8.58e-05	<0.001	56908	0.544	0.003	0.002	8.19e-06	0.075
Self Report	Sedentary Behavior	VAT	rs12105701	2	41737200	C	T	422218	0.396	-0.013	0.002	9.03e-05	<0.001	56908	0.396	-0.008	0.002	5.26e-05	<0.001
Self Report	Sedentary Behavior	VAT	rs12272012	11	84861286	G	C	422218	0.956	-0.03	0.005	8.38e-05	<0.001	56908	0.956	-0.009	0.004	1.19e-05	0.032
Self Report	Sedentary Behavior	VAT	rs12289262	11	12894758	C	T	422218	0.731	-0.014	0.002	8.36e-05	<0.001	56908	0.732	-0.005	0.002	1.93e-05	0.0063
Self Report	Sedentary Behavior	VAT	rs1243182	10	21916728	C	T	422218	0.69	-0.019	0.002	0.000167	<0.001	56908	0.689	-0.01	0.002	7.35e-05	<0.001
Self Report	Sedentary Behavior	VAT	rs12476388	2	116330983	C	T	422218	0.709	0.013	0.002	8.33e-05	<0.001	56908	0.709	0.002	0.002	1.91e-06	0.39
Self Report	Sedentary Behavior	VAT	rs12491503	3	165706855	G	A	422218	0.67	-0.014	0.002	0.000102	<0.001	56908	0.671	-0.003	0.002	8.08e-06	0.077
Self Report	Sedentary Behavior	VAT	rs12541615	8	118870151	T	C	422218	0.817	-0.018	0.003	0.000104	<0.001	56908	0.817	-0.005	0.002	1.16e-05	0.034
Self Report	Sedentary Behavior	VAT	rs12554512	9	23352293	T	C	422218	0.584	0.021	0.002	0.000236	<0.001	56908	0.585	-0.003	0.002	9.6e-06	0.054
Self Report	Sedentary Behavior	VAT	rs12725114	1	62432641	G	A	422218	0.802	0.015	0.003	8.47e-05	<0.001	56908	0.803	0.006	0.002	2.23e-05	0.0033
Self Report	Sedentary Behavior	VAT	rs1278847	1	110037483	C	A	422218	0.694	0.016	0.002	0.000122	<0.001	56908	0.696	-0.005	0.002	2.23e-05	0.0033
Self Report	Sedentary Behavior	VAT	rs13029509	2	215374209	G	A	422218	0.52	-0.018	0.002	0.000191	<0.001	56908	0.52	-0.004	0.002	1.72e-05	0.01
Self Report	Sedentary Behavior	VAT	rs13107325	4	103188709	C	T	422218	0.926	-0.029	0.004	0.000133	<0.001	56908	0.925	-0.02	0.003	9.76e-05	<0.001
Self Report	Sedentary Behavior	VAT	rs138256022	3	11603090	C	T	422218	0.959	-0.031	0.006	8.17e-05	<0.001	56908	0.959	-0.002	0.005	4.4e-07	0.68
Self Report	Sedentary Behavior	VAT	rs141184308	9	86463339	A	G	422218	0.978	0.043	0.008	8.22e-05	<0.001	56908	0.978	-0.002	0.006	2.41e-07	0.76
Self Report	Sedentary Behavior	VAT	rs1421334	8	30865733	A	C	422218	0.45	0.017	0.002	0.000167	<0.001	56908	0.451	0.01	0.002	9.23e-05	<0.001
Self Report	Sedentary Behavior	VAT	rs1563908	5	60437381	A	G	422218	0.62	0.016	0.002	0.000143	<0.001	56908	0.622	0	0.002	4.06e-10	0.99
Self Report	Sedentary Behavior	VAT	rs1623025	10	11164813	G	C	422218	0.529	-0.012	0.002	8.54e-05	<0.001	56908	0.527	0	0.002	1.46e-08	0.94
Self Report	Sedentary Behavior	VAT	rs17207890	11	95490754	G	A	422218	0.657	0.016	0.002	0.000125	<0.001	56908	0.657	0.002	0.002	2.35e-06	0.34
Self Report	Sedentary Behavior	VAT	rs17379561	1	98340139	A	T	422218	0.856	-0.025	0.003	0.000183	<0.001	56908	0.856	-0.01	0.002	4.39e-05	<0.001
Self Report	Sedentary Behavior	VAT	rs17568389	7	8091876	T	A	422218	0.487	0.015	0.002	0.000136	<0.001	56908	0.487	0.003	0.002	1.02e-05	0.047
Self Report	Sedentary Behavior	VAT	rs17727474	10	127182959	C	T	422218	0.832	0.018	0.003	9.32e-05	<0.001	56908	0.832	0.002	0.002	1.41e-06	0.46
Self Report	Sedentary Behavior	VAT	rs17789218	6	100600097	T	C	422218	0.756	0.019	0.003	0.000145	<0.001	56908	0.756	-0.006	0.002	2.33e-05	0.0027
Self Report	Sedentary Behavior	VAT	rs1889778	1	61066279	C	T	422218	0.536	0.012	0.002	8.74e-05	<0.001	56908	0.536	0.004	0.002	1.38e-05	0.021
Self Report	Sedentary Behavior	VAT	rs2034768	3	93986371	A	G	422218	0.487	0.015	0.002	0.000124	<0.001	56908	0.488	0.011	0.002	0.000112	<0.001
Self Report	Sedentary Behavior	VAT	rs2045147	10	56660437	A	G	422218	0.449	0.013	0.002	8.99e-05	<0.001	56908	0.452	0.001	0.002	1.18e-06	0.5
Self Report	Sedentary Behavior	VAT	rs2060199	2	166196681	T	A	422218	0.446	0.012	0.002	8.26e-05	<0.001	56908	0.446	0.003	0.002	6.6e-06	0.11
Self Report	Sedentary Behavior	VAT	rs2073869	9	135763816	C	T	422218	0.834	0.019	0.003	0.000109	<0.001	56908	0.833	0.003	0.002	4.44e-06	0.19
Self Report	Sedentary Behavior	VAT	rs2164744	12	109872039	T	C	422218	0.635	-0.013	0.002	8.67e-05	<0.001	56908	0.632	-0.003	0.002	6.25e-06	0.12
Self Report	Sedentary Behavior	VAT	rs2173650	12	117525235	G	T	422218	0.852	0.018	0.003	9.12e-05	<0.001	56908	0.853	0.001	0.002	4.69e-07	0.67
Self Report	Sedentary Behavior	VAT	rs2184364	6	143183596	A	G	422218	0.782	0.016	0.003	9.34e-05	<0.001	56908	0.783	0.008	0.002	3.58e-05	<0.001
Self Report	Sedentary Behavior	VAT	rs2460	15	53073084	G	A	422218	0.736	-0.015	0.002	0.000103	<0.001	56908	0.737	-0.007	0.002	3.72e-05	<0.001
Self Report	Sedentary Behavior	VAT	rs2616830	9	1721385	G	A	422218	0.462	0.016	0.002	0.000153	<0.001	56908	0.46	-0.001	0.002	1.12e-06	0.51
Self Report	Sedentary Behavior	VAT	rs262890	5	62930015	A	G	422218	0.699	-0.019	0.002	0.000165	<0.001	56908	0.7	-0.008	0.002	4.21e-05	<0.001
Self Report	Sedentary Behavior	VAT	rs2717559	8	143882420	A	G	422218	0.559	0.012	0.002	8.51e-05	<0.001	56908	0.559	0.001	0.002	1.48e-06	0.45
Self Report	Sedentary Behavior	VAT	rs2787374	9	103054951	T	C	422218	0.408	0.012	0.002	8.62e-05	<0.001	56908	0.412	0.004	0.002	1.25e-05	0.028
Self Report	Sedentary Behavior	VAT	rs28457808	7	99023246	C	G	422218	0.837	0.017	0.003	8.51e-05	<0.001	56908	0.837	0.013	0.002	8.07e-05	<0.001
Self Report	Sedentary Behavior	VAT	rs28971796	4	49151982	A	G	422218	0.378	0.015	0.002	9.52e-05	<0.001	56908	0.38	0.008	0.002	4.2e-05	<0.001
Self Report	Sedentary Behavior	VAT	rs34224261	2	193855452	G	C	422218	0.469	-0.018	0.002	0.000175	<0.001	56908	0.471	-0.007	0.002	4.23e-05	<0.001
Self Report	Sedentary Behavior	VAT	rs34864022	9	22609110	A	G	422218	0.934	-0.026	0.004	9.73e-05	<0.001	56908	0.934	-0.007	0.003	9.22e-06	0.059
Self Report	Sedentary Behavior	VAT	rs35574015	16	15146061	T	C	422218	0.706	-0.013	0.002	8.15e-05	<0.001	56908	0.705	0.005	0.002	1.91e-05	0.0066
Self Report	Sedentary Behavior	VAT	rs374722	2	147839830	G	A	422218	0.15	0.024	0.003	0.000174	<0.001	56908	0.151	0.006	0.002	1.81e-05	0.0082
Self Report	Sedentary Behavior	VAT	rs3754970	2	162091836	T	C	422218	0.496	-0.015	0.002	0.000127	<0.001	56908	0.496	-0.005	0.002	2.22e-05	0.0034
Self Report	Sedentary Behavior	VAT	rs3796386	3	49899795	G	A	422218	0.572	-0.026	0.002	0.000383	<0.001	56908	0.574	-0.013	0.002	0.000149	<0.001
Self Report	Sedentary Behavior	VAT	rs405797	14	26972834	T	A	422218	0.247	-0.015	0.003	9.37e-05	<0.001	56908	0.247	-0.005	0.002	1.63e-05	0.012
Self Report	Sedentary Behavior	VAT	rs42210	5	166408788	G	C	422218	0.289	-0.014	0.002	8.88e-05	<0.001	56908	0.288	-0.003	0.002	4.44e-06	0.19
Self Report	Sedentary Behavior	VAT	rs4334769	4	130245233	G	T	422218	0.474	0.012	0.002	8.33e-05	<0.001	56908	0.475	-0.002	0.002	3.15e-06	0.27
Self Report	Sedentary Behavior	VAT	rs4382592	9	134870755	T	G	422218	0.301	0.014	0.002	8.92e-05	<0.001	56908	0.301	0.008	0.002	4.37e-05	<0.001
Self Report	Sedentary Behavior	VAT	rs4435081	12	74331820	C	T	422218	0.53	0.012	0.002	8.29e-05	<0.001	56908	0.529	0.003	0.002	8.87e-06	0.064
Self Report	Sedentary Behavior	VAT	rs4523073	6	67550288	A	G	422218	0.591	-0.014	0.002	0.000103	<0.001	56908	0.591	-0.001	0.002	1.23e-06	0.49
Self Report	Sedentary Behavior	VAT	rs4577309	2	191288833	A	G	422218	0.469	0.016	0.002	0.000144	<0.001	56908	0.467	0.003	0.002	8.37e-06	0.072
Self Report	Sedentary Behavior	VAT	rs4675246	2	202864487	G	T	422218	0.797	-0.015	0.003	8.17e-05	<0.001	56908	0.8	0.001	0.002	5.32e-07	0.65
Self Report	Sedentary Behavior	VAT	rs4775373	15	61476936	T	C	422218	0.361	0.013	0.002	9.11e-05	<0.001	56908	0.362	0.005	0.002	2.22e-05	0.0034
Self Report	Sedentary Behavior	VAT	rs4845364	1	154141908	A	G	422218	0.495	-0.015	0.002	0.000134	<0.001	56908	0.493	-0.001	0.002	5e-07	0.66
Self Report	Sedentary Behavior	VAT	rs4937842	11	133734542	G	C	422218	0.634	-0.013	0.002	8.54e-05	<0.001	56908	0.632	-0.006	0.002	2.42e-05	0.0022
Self Report	Sedentary Behavior	VAT	rs4950109	1	98680037	T	C	422218	0.381	-0.013	0.002	8.77e-05	<0.001	56908	0.381	0	0.002	8.04e-08	0.86
Self Report	Sedentary Behavior	VAT	rs4973576	2	233806771	C	A	422218	0.298	-0.015	0.002	9.91e-05	<0.001	56908	0.297	0.001	0.002	8.78e-07	0.56
Self Report	Sedentary Behavior	VAT	rs55909997	1	107581039	G	A	422218	0.65	-0.014	0.002	9.45e-05	<0.001	56908	0.651	-0.008	0.002	4.95e-05	<0.001
Self Report	Sedentary Behavior	VAT	rs56291505	2	53891958	A	G	422218	0.72	-0.014	0.002	8.31e-05	<0.001	56908	0.717	0.003	0.002	5.93e-06	0.13
Self Report	Sedentary Behavior	VAT	rs56858768	13	86511730	G	A	422218	0.701	-0.015	0.002	0.000105	<0.001	56908	0.703	-0.008	0.002	4.59e-05	<0.001
Self Report	Sedentary Behavior	VAT	rs57585211	5	107197725	T	G	422218	0.827	-0.017	0.003	9.15e-05	<0.001	56908	0.828	-0.001	0.002	1.07e-06	0.52
Self Report	Sedentary Behavior	VAT	rs61331678	15	77995949	G	C	422218	0.568	0.015	0.002	0.000126	<0.001	56908	0.57	0.005	0.002	1.94e-05	0.0062
Self Report	Sedentary Behavior	VAT	rs62151809	2	104433256	C	T	422218	0.545	-0.016	0.002	0.000138	<0.001	56908	0.547	-0.009	0.002	6.86e-05	<0.001
Self Report	Sedentary Behavior	VAT	rs62379379	5	141082015	G	T	422218	0.929	-0.026	0.004	0.0001	<0.001	56908	0.928	0.005	0.003	6.6e-06	0.11
Self Report	Sedentary Behavior	VAT	rs62471080	7	109128060	G	C	422218	0.541	-0.013	0.002	9.23e-05	<0.001	56908	0.54	-0.006	0.002	2.87e-05	<0.001
Self Report	Sedentary Behavior	VAT	rs62490165	7	112949003	A	T	422218	0.666	-0.013	0.002	8.72e-05	<0.001	56908	0.666	-0.007	0.002	4.37e-05	<0.001
Self Report	Sedentary Behavior	VAT	rs62641636	2	68425427	A	G	422218	0.692	0.014	0.002	0.000101	<0.001	56908	0.692	0.005	0.002	2.08e-05	0.0046
Self Report	Sedentary Behavior	VAT	rs6472942	8	76827190	T	C	422218	0.568	-0.013	0.002	9.6e-05	<0.001	56908	0.567	0.007	0.002	3.99e-05	<0.001
Self Report	Sedentary Behavior	VAT	rs6551301	3	88294647	T	C	422218	0.287	-0.014	0.002	9.7e-05	<0.001	56908	0.286	-0.009	0.002	5.64e-05	<0.001
Self Report	Sedentary Behavior	VAT	rs6673341	1	184655649	T	G	422218	0.465	-0.015	0.002	0.000119	<0.001	56908	0.464	-0.005	0.002	2.26e-05	0.0031
Self Report	Sedentary Behavior	VAT	rs66852340	4	3311070	C	T	422218	0.776	-0.018	0.003	0.000124	<0.001	56908	0.775	-0.007	0.002	2.71e-05	0.0012
Self Report	Sedentary Behavior	VAT	rs6721975	2	5832667	T	C	422218	0.232	-0.017	0.003	0.000108	<0.001	56908	0.229	-0.004	0.002	9.68e-06	0.053
Self Report	Sedentary Behavior	VAT	rs6754968	2	105414479	G	A	422218	0.653	-0.014	0.002	0.000104	<0.001	56908	0.654	-0.007	0.002	4.31e-05	<0.001
Self Report	Sedentary Behavior	VAT	rs6797840	3	85656569	A	C	422218	0.456	-0.016	0.002	0.000144	<0.001	56908	0.457	-0.005	0.002	2.19e-05	0.0036
Self Report	Sedentary Behavior	VAT	rs6825241	4	152543783	C	A	422218	0.536	-0.017	0.002	0.000163	<0.001	56908	0.537	-0.005	0.002	1.85e-05	0.0075
Self Report	Sedentary Behavior	VAT	rs6850494	4	82291771	A	C	422218	0.616	-0.014	0.002	0.00011	<0.001	56908	0.614	-0.003	0.002	9.6e-06	0.054
Self Report	Sedentary Behavior	VAT	rs6905544	6	98411631	A	G	422218	0.399	-0.019	0.002	0.000196	<0.001	56908	0.398	-0.01	0.002	9.21e-05	<0.001
Self Report	Sedentary Behavior	VAT	rs6973656	7	77422583	A	G	422218	0.603	-0.013	0.002	9.91e-05	<0.001	56908	0.603	-0.004	0.002	1.26e-05	0.027
Self Report	Sedentary Behavior	VAT	rs6996198	8	65463442	C	T	422218	0.843	-0.016	0.003	8.07e-05	<0.001	56908	0.843	-0.006	0.002	1.4e-05	0.02
Self Report	Sedentary Behavior	VAT	rs7043521	9	124602779	A	T	422218	0.431	0.014	0.002	0.000113	<0.001	56908	0.431	0.003	0.002	1.02e-05	0.047
Self Report	Sedentary Behavior	VAT	rs707919	6	31641139	A	G	422218	0.717	-0.014	0.002	8.44e-05	<0.001	56908	0.714	-0.003	0.002	6.25e-06	0.12
Self Report	Sedentary Behavior	VAT	rs7089973	10	116569565	C	A	422218	0.619	-0.013	0.002	9.45e-05	<0.001	56908	0.62	0	0.002	3.3e-08	0.91
Self Report	Sedentary Behavior	VAT	rs7157001	14	99749484	A	G	422218	0.744	-0.014	0.002	8.29e-05	<0.001	56908	0.743	-0.003	0.002	7.38e-06	0.091
Self Report	Sedentary Behavior	VAT	rs7184800	16	53509131	G	A	422218	0.697	0.017	0.002	0.000136	<0.001	56908	0.698	-0.002	0.002	2.89e-06	0.29
Self Report	Sedentary Behavior	VAT	rs72723237	1	188048775	C	T	422218	0.98	-0.047	0.008	9.15e-05	<0.001	56908	0.98	-0.008	0.006	3.72e-06	0.23
Self Report	Sedentary Behavior	VAT	rs72781699	2	24277709	G	A	422218	0.797	-0.019	0.003	0.000129	<0.001	56908	0.797	-0.003	0.002	3.57e-06	0.24
Self Report	Sedentary Behavior	VAT	rs72828890	5	167806836	C	T	422218	0.869	0.019	0.003	9.08e-05	<0.001	56908	0.872	0.002	0.003	1.75e-06	0.41
Self Report	Sedentary Behavior	VAT	rs72834698	6	26176517	G	A	422218	0.858	0.023	0.003	0.000142	<0.001	56908	0.858	0.015	0.002	9.19e-05	<0.001
Self Report	Sedentary Behavior	VAT	rs749671	16	31088347	G	A	422218	0.629	0.016	0.002	0.00013	<0.001	56908	0.628	0.01	0.002	8.99e-05	<0.001
Self Report	Sedentary Behavior	VAT	rs7564130	2	50606642	T	C	422218	0.641	-0.015	0.002	0.000118	<0.001	56908	0.639	-0.005	0.002	1.63e-05	0.012
Self Report	Sedentary Behavior	VAT	rs7693082	4	159857819	G	C	422218	0.3	0.015	0.002	0.000108	<0.001	56908	0.3	0.005	0.002	1.53e-05	0.015
Self Report	Sedentary Behavior	VAT	rs7693703	4	118357405	G	A	422218	0.91	0.023	0.004	9.39e-05	<0.001	56908	0.91	0.006	0.003	1.07e-05	0.042
Self Report	Sedentary Behavior	VAT	rs7700107	4	17880416	A	C	422218	0.863	-0.021	0.003	0.00012	<0.001	56908	0.861	-0.004	0.002	5.36e-06	0.15
Self Report	Sedentary Behavior	VAT	rs7716447	5	88800331	A	G	422218	0.639	-0.013	0.002	9.24e-05	<0.001	56908	0.639	-0.005	0.002	1.83e-05	0.0078
Self Report	Sedentary Behavior	VAT	rs7834121	8	10770255	G	T	422218	0.504	-0.014	0.002	0.00011	<0.001	56908	0.503	0.008	0.002	5.71e-05	<0.001
Self Report	Sedentary Behavior	VAT	rs7865801	9	14745886	G	A	422218	0.367	0.013	0.002	8.41e-05	<0.001	56908	0.37	0.005	0.002	2.19e-05	0.0036
Self Report	Sedentary Behavior	VAT	rs7991062	13	100713194	C	G	422218	0.659	-0.018	0.002	0.00016	<0.001	56908	0.658	-0.006	0.002	3.23e-05	<0.001
Self Report	Sedentary Behavior	VAT	rs801733	11	65934549	A	C	422218	0.641	0.017	0.002	0.000149	<0.001	56908	0.642	0.01	0.002	7.34e-05	<0.001
Self Report	Sedentary Behavior	VAT	rs8043253	15	41503730	C	T	422218	0.573	-0.012	0.002	8.09e-05	<0.001	56908	0.572	-0.001	0.002	1.91e-06	0.39
Self Report	Sedentary Behavior	VAT	rs870151	9	92230747	T	A	422218	0.528	-0.016	0.002	0.000136	<0.001	56908	0.528	-0.005	0.002	2.55e-05	0.0017
Self Report	Sedentary Behavior	VAT	rs8756	12	66359752	C	A	422218	0.485	-0.013	0.002	0.000102	<0.001	56908	0.483	0.006	0.002	2.67e-05	0.0013
Self Report	Sedentary Behavior	VAT	rs9326862	5	112054547	A	T	422218	0.468	0.012	0.002	8.22e-05	<0.001	56908	0.469	0.006	0.002	3.29e-05	<0.001
Self Report	Sedentary Behavior	VAT	rs9362612	6	89803035	T	A	422218	0.586	0.012	0.002	8.51e-05	<0.001	56908	0.587	-0.001	0.002	5.32e-07	0.65
Self Report	Sedentary Behavior	VAT	rs9563168	13	54247827	G	A	422218	0.791	0.018	0.003	0.000115	<0.001	56908	0.79	0.004	0.002	1.04e-05	0.045
Self Report	Sedentary Behavior	VAT	rs9569734	13	58319476	A	G	422218	0.844	0.019	0.003	0.000105	<0.001	56908	0.845	0.012	0.002	6.46e-05	<0.001
Self Report	Sedentary Behavior	VAT	rs9718104	6	166170539	T	G	422218	0.942	-0.041	0.005	0.000208	<0.001	56908	0.942	-0.001	0.004	1.66e-07	0.8
Self Report	Sedentary Behavior	VAT	rs973734	7	89387578	C	A	422218	0.152	0.017	0.003	8.51e-05	<0.001	56908	0.152	0.001	0.002	5e-07	0.66
Self Report	Sedentary Behavior	VAT	rs9834970	3	36856030	T	C	422218	0.501	0.013	0.002	9.29e-05	<0.001	56908	0.502	0.001	0.002	3.08e-07	0.73
Self Report	Sedentary Behavior	VAT	rs984409	1	67020440	G	A	422218	0.363	-0.015	0.002	0.000116	<0.001	56908	0.361	-0.003	0.002	7.08e-06	0.098
Self Report	Sedentary Behavior	VAT	rs9867121	3	114631548	C	A	422218	0.818	0.019	0.003	0.000128	<0.001	56908	0.816	0.001	0.002	5e-07	0.66
Self Report	Moderate PA	VAT	rs10499298	6	156134070	C	T	360912	0.866	-0.016	0.003	6.35e-05	<0.001	56908	0.866	0	0.003	1.02e-08	0.95
Self Report	Moderate PA	VAT	rs10733788	10	64917865	T	C	360912	0.187	0.015	0.003	6.84e-05	<0.001	56908	0.188	0.006	0.002	1.86e-05	0.0073
Self Report	Moderate PA	VAT	rs111770177	6	108411861	A	G	360912	0.957	-0.029	0.006	6.16e-05	<0.001	56908	0.957	0.004	0.005	1.61e-06	0.43
Self Report	Moderate PA	VAT	rs11210871	1	44029353	C	G	360912	0.299	0.013	0.003	7.22e-05	<0.001	56908	0.3	0.003	0.002	6.25e-06	0.12
Self Report	Moderate PA	VAT	rs1125854	7	131927170	T	C	360912	0.372	0.011	0.002	6.04e-05	<0.001	56908	0.372	-0.002	0.002	2.45e-06	0.33
Self Report	Moderate PA	VAT	rs114994358	5	52878085	A	T	360912	0.759	0.013	0.003	6.35e-05	<0.001	56908	0.759	0.001	0.002	7.11e-07	0.6
Self Report	Moderate PA	VAT	rs11696799	20	2345187	C	T	360912	0.556	0.011	0.002	6.12e-05	<0.001	56908	0.557	0.001	0.002	2.41e-07	0.76
Self Report	Moderate PA	VAT	rs11763958	7	133417163	A	G	360912	0.651	0.012	0.002	6.38e-05	<0.001	56908	0.651	0	0.002	1.02e-08	0.95
Self Report	Moderate PA	VAT	rs117956478	8	38526258	G	C	360912	0.939	0.022	0.005	6.01e-05	<0.001	56908	0.938	-0.009	0.004	1.53e-05	0.015
Self Report	Moderate PA	VAT	rs117997293	7	7291817	A	G	360912	0.987	-0.048	0.01	6.32e-05	<0.001	56908	0.987	-0.002	0.008	1.05e-07	0.84
Self Report	Moderate PA	VAT	rs1249272	10	28660953	C	G	360912	0.804	0.013	0.003	6.01e-05	<0.001	56908	0.804	-0.002	0.002	1.54e-06	0.44
Self Report	Moderate PA	VAT	rs13135858	4	28678144	A	T	360912	0.88	-0.017	0.004	6.19e-05	<0.001	56908	0.88	-0.003	0.003	2.78e-06	0.3
Self Report	Moderate PA	VAT	rs143047361	19	58013463	G	A	360912	0.956	-0.028	0.006	6.78e-05	<0.001	56908	0.955	-0.004	0.004	2.45e-06	0.33
Self Report	Moderate PA	VAT	rs1800497	11	113270828	G	A	360912	0.798	-0.014	0.003	6.58e-05	<0.001	56908	0.798	-0.011	0.002	6.26e-05	<0.001
Self Report	Moderate PA	VAT	rs1941599	11	76433754	A	G	360912	0.696	0.013	0.003	6.78e-05	<0.001	56908	0.696	0.007	0.002	3.51e-05	<0.001
Self Report	Moderate PA	VAT	rs2041786	16	50539323	A	G	360912	0.844	0.015	0.003	6.49e-05	<0.001	56908	0.844	0	0.002	4.06e-10	0.99
Self Report	Moderate PA	VAT	rs2194114	5	114914176	T	C	360912	0.951	0.026	0.005	6.69e-05	<0.001	56908	0.951	0.004	0.004	2.89e-06	0.29
Self Report	Moderate PA	VAT	rs4895842	6	129349539	T	C	360912	0.315	-0.011	0.002	5.96e-05	<0.001	56908	0.315	-0.002	0.002	4.65e-06	0.18
Self Report	Moderate PA	VAT	rs61788223	1	107361457	G	T	360912	0.982	-0.042	0.009	6.29e-05	<0.001	56908	0.982	-0.013	0.007	1.08e-05	0.041
Self Report	Moderate PA	VAT	rs6545389	2	54386901	A	G	360912	0.5	-0.013	0.002	8.43e-05	<0.001	56908	0.5	0.004	0.002	1.08e-05	0.041
Self Report	Moderate PA	VAT	rs664095	3	127481508	G	C	360912	0.166	0.015	0.003	6.1e-05	<0.001	56908	0.167	-0.001	0.002	8.78e-07	0.56
Self Report	Moderate PA	VAT	rs67839898	15	37936599	T	C	360912	0.921	-0.02	0.004	6.29e-05	<0.001	56908	0.921	-0.005	0.003	5.93e-06	0.13
Self Report	Moderate PA	VAT	rs6950425	7	92506072	A	C	360912	0.961	-0.028	0.006	6.35e-05	<0.001	56908	0.961	-0.001	0.004	6.92e-08	0.87
Self Report	Moderate PA	VAT	rs75541225	4	61973321	G	T	360912	0.784	0.014	0.003	6.01e-05	<0.001	56908	0.784	-0.003	0.002	3.89e-06	0.22
Self Report	Moderate PA	VAT	rs76440758	11	71840144	G	A	360912	0.97	-0.031	0.007	5.83e-05	<0.001	56908	0.97	-0.008	0.005	5.93e-06	0.13
Self Report	Moderate PA	VAT	rs7697278	4	66243126	C	T	360912	0.43	-0.011	0.002	6.49e-05	<0.001	56908	0.43	0	0.002	3.66e-09	0.97
Self Report	Moderate PA	VAT	rs7855678	9	74632838	C	T	360912	0.246	0.013	0.003	6.14e-05	<0.001	56908	0.246	0.004	0.002	1.06e-05	0.043
Self Report	Moderate PA	VAT	rs7971399	12	46613729	T	C	360912	0.188	-0.014	0.003	6.58e-05	<0.001	56908	0.188	-0.003	0.002	6.6e-06	0.11
Self Report	Moderate PA	VAT	rs8070414	17	63428940	T	G	360912	0.89	0.018	0.004	6.97e-05	<0.001	56908	0.891	-0.001	0.003	2.02e-07	0.78
Self Report	Moderate PA	VAT	rs918113	12	68212630	G	A	360912	0.842	0.015	0.003	6.63e-05	<0.001	56908	0.842	0.002	0.002	1.91e-06	0.39
Self Report	Moderate PA	VAT	rs9394983	6	44054553	C	T	360912	0.563	-0.011	0.002	5.88e-05	<0.001	56908	0.563	0.001	0.002	6.73e-07	0.61
Self Report	Moderate PA	VAT	rs9570032	13	59628121	T	C	360912	0.901	-0.018	0.004	5.88e-05	<0.001	56908	0.901	0.008	0.003	2.06e-05	0.0048
Self Report	Moderate-to-Vigorous PA	VAT	rs10041140	5	51378177	A	T	377234	0.733	0.012	0.003	6.47e-05	<0.001	56908	0.733	-0.006	0.002	2.52e-05	0.0018
Self Report	Moderate-to-Vigorous PA	VAT	rs10145335	14	98547748	G	A	377234	0.749	-0.014	0.003	8.2e-05	<0.001	56908	0.749	-0.005	0.002	1.63e-05	0.012
Self Report	Moderate-to-Vigorous PA	VAT	rs10157145	1	205261963	T	C	377234	0.496	-0.012	0.002	7.55e-05	<0.001	56908	0.496	-0.001	0.002	9.24e-07	0.55
Self Report	Moderate-to-Vigorous PA	VAT	rs1043595	7	128410012	G	A	377234	0.717	0.014	0.002	9.15e-05	<0.001	56908	0.717	0	0.002	1.49e-07	0.81
Self Report	Moderate-to-Vigorous PA	VAT	rs10506671	12	75522128	G	A	377234	0.911	-0.019	0.004	6.55e-05	<0.001	56908	0.91	0.004	0.003	4.25e-06	0.2
Self Report	Moderate-to-Vigorous PA	VAT	rs11048486	12	26524796	C	A	377234	0.835	0.014	0.003	5.73e-05	<0.001	56908	0.836	0.003	0.002	4.06e-06	0.21
Self Report	Moderate-to-Vigorous PA	VAT	rs11081859	18	31926289	G	A	377234	0.108	0.018	0.004	7.15e-05	<0.001	56908	0.108	0.004	0.003	5.93e-06	0.13
Self Report	Moderate-to-Vigorous PA	VAT	rs112016448	17	77656817	C	T	377234	0.991	-0.062	0.013	5.93e-05	<0.001	56908	0.991	-0.001	0.01	3.3e-08	0.91
Self Report	Moderate-to-Vigorous PA	VAT	rs112308536	17	2223997	A	G	377234	0.679	0.011	0.002	5.54e-05	<0.001	56908	0.679	0.006	0.002	2.36e-05	0.0025
Self Report	Moderate-to-Vigorous PA	VAT	rs114243593	5	155074831	A	G	377234	0.947	0.027	0.005	7.84e-05	<0.001	56908	0.947	0.001	0.004	3.32e-07	0.72
Self Report	Moderate-to-Vigorous PA	VAT	rs114524724	3	1691671	C	G	377234	0.975	0.035	0.007	6.4e-05	<0.001	56908	0.975	-0.006	0.005	3.28e-06	0.26
Self Report	Moderate-to-Vigorous PA	VAT	rs115181288	1	114130641	C	T	377234	0.945	-0.023	0.005	5.93e-05	<0.001	56908	0.945	0.003	0.004	1.54e-06	0.44
Self Report	Moderate-to-Vigorous PA	VAT	rs11641100	16	52469793	C	T	377234	0.556	0.012	0.002	7.29e-05	<0.001	56908	0.556	0.001	0.002	3.84e-07	0.7
Self Report	Moderate-to-Vigorous PA	VAT	rs1186721	7	34974602	G	A	377234	0.684	-0.013	0.002	7.95e-05	<0.001	56908	0.684	-0.003	0.002	6.25e-06	0.12
Self Report	Moderate-to-Vigorous PA	VAT	rs11913445	22	20142513	C	A	377234	0.832	0.015	0.003	6.83e-05	<0.001	56908	0.832	-0.002	0.002	2.66e-06	0.31
Self Report	Moderate-to-Vigorous PA	VAT	rs12360330	10	104148355	C	T	377234	0.865	-0.016	0.003	6.22e-05	<0.001	56908	0.865	0.002	0.003	2.17e-06	0.36
Self Report	Moderate-to-Vigorous PA	VAT	rs12912808	15	95292223	C	T	377234	0.851	0.018	0.003	8.44e-05	<0.001	56908	0.851	-0.005	0.002	1.19e-05	0.032
Self Report	Moderate-to-Vigorous PA	VAT	rs12979056	19	17862131	G	A	377234	0.542	-0.01	0.002	5.93e-05	<0.001	56908	0.542	0.003	0.002	5.63e-06	0.14
Self Report	Moderate-to-Vigorous PA	VAT	rs1340704	13	76506657	C	T	377234	0.402	0.01	0.002	5.56e-05	<0.001	56908	0.402	-0.001	0.002	1.68e-06	0.42
Self Report	Moderate-to-Vigorous PA	VAT	rs139907649	14	90289275	G	A	377234	0.991	-0.059	0.012	6.14e-05	<0.001	56908	0.991	0.015	0.01	5.93e-06	0.13
Self Report	Moderate-to-Vigorous PA	VAT	rs1469851	13	102299385	A	T	377234	0.198	0.014	0.003	6.35e-05	<0.001	56908	0.198	0.002	0.002	1.75e-06	0.41
Self Report	Moderate-to-Vigorous PA	VAT	rs150863806	1	40949997	G	A	377234	0.969	0.032	0.007	6.22e-05	<0.001	56908	0.97	-0.009	0.005	7.38e-06	0.091
Self Report	Moderate-to-Vigorous PA	VAT	rs161344	7	137045731	C	A	377234	0.568	-0.01	0.002	5.64e-05	<0.001	56908	0.569	0.005	0.002	2.38e-05	0.0024
Self Report	Moderate-to-Vigorous PA	VAT	rs17183317	4	171734020	A	G	377234	0.937	-0.022	0.005	5.97e-05	<0.001	56908	0.937	-0.002	0.004	8.34e-07	0.57
Self Report	Moderate-to-Vigorous PA	VAT	rs17573850	13	44885589	A	G	377234	0.741	0.012	0.003	6.08e-05	<0.001	56908	0.741	-0.003	0.002	6.6e-06	0.11
Self Report	Moderate-to-Vigorous PA	VAT	rs1873585	3	173641375	A	G	377234	0.778	-0.012	0.003	5.6e-05	<0.001	56908	0.778	0.006	0.002	2.49e-05	0.0019
Self Report	Moderate-to-Vigorous PA	VAT	rs1921981	21	42422547	G	A	377234	0.674	0.013	0.002	8.03e-05	<0.001	56908	0.674	-0.002	0.002	2.45e-06	0.33
Self Report	Moderate-to-Vigorous PA	VAT	rs1972763	4	159860563	C	T	377234	0.342	0.013	0.002	8.1e-05	<0.001	56908	0.344	0.004	0.002	1.56e-05	0.014
Self Report	Moderate-to-Vigorous PA	VAT	rs1974771	2	54278543	G	A	377234	0.9	-0.021	0.004	8.93e-05	<0.001	56908	0.9	0.004	0.003	5.1e-06	0.16
Self Report	Moderate-to-Vigorous PA	VAT	rs2035562	3	85056521	A	G	377234	0.328	-0.014	0.002	9.2e-05	<0.001	56908	0.328	-0.007	0.002	3.94e-05	<0.001
Self Report	Moderate-to-Vigorous PA	VAT	rs2114286	3	41194283	A	G	377234	0.466	-0.012	0.002	8.1e-05	<0.001	56908	0.466	0.004	0.002	1.2e-05	0.031
Self Report	Moderate-to-Vigorous PA	VAT	rs2148201	10	2323505	G	A	377234	0.509	-0.011	0.002	6.08e-05	<0.001	56908	0.509	0	0.002	6.5e-09	0.96
Self Report	Moderate-to-Vigorous PA	VAT	rs2267443	22	42287454	A	G	377234	0.381	0.011	0.002	5.73e-05	<0.001	56908	0.381	0.001	0.002	7.11e-07	0.6
Self Report	Moderate-to-Vigorous PA	VAT	rs2267549	12	4771682	G	A	377234	0.546	0.011	0.002	5.83e-05	<0.001	56908	0.545	-0.001	0.002	1.83e-06	0.4
Self Report	Moderate-to-Vigorous PA	VAT	rs2283249	11	17824372	T	G	377234	0.752	-0.013	0.003	6.3e-05	<0.001	56908	0.752	0.001	0.002	9.24e-07	0.55
Self Report	Moderate-to-Vigorous PA	VAT	rs2388195	6	98283960	A	C	377234	0.561	-0.012	0.002	7.26e-05	<0.001	56908	0.559	-0.002	0.002	4.44e-06	0.19
Self Report	Moderate-to-Vigorous PA	VAT	rs2451292	2	163924441	T	G	377234	0.473	-0.01	0.002	5.64e-05	<0.001	56908	0.473	-0.002	0.002	2.35e-06	0.34
Self Report	Moderate-to-Vigorous PA	VAT	rs2494664	1	154057802	A	G	377234	0.54	-0.012	0.002	7.59e-05	<0.001	56908	0.541	0	0.002	6.92e-08	0.87
Self Report	Moderate-to-Vigorous PA	VAT	rs2638463	12	89669785	G	A	377234	0.694	-0.012	0.003	5.57e-05	<0.001	56908	0.694	0	0.002	3.3e-08	0.91
Self Report	Moderate-to-Vigorous PA	VAT	rs2710477	2	210508116	T	A	377234	0.919	-0.021	0.004	6.89e-05	<0.001	56908	0.919	-0.001	0.003	4.11e-07	0.69
Self Report	Moderate-to-Vigorous PA	VAT	rs2854277	6	32628084	C	T	377234	0.917	0.032	0.005	0.000106	<0.001	56908	0.918	-0.007	0.004	8.74e-06	0.066
Self Report	Moderate-to-Vigorous PA	VAT	rs293566	20	31097877	T	C	377234	0.669	-0.011	0.002	5.86e-05	<0.001	56908	0.668	-0.005	0.002	2.14e-05	0.004
Self Report	Moderate-to-Vigorous PA	VAT	rs2942127	1	204420067	G	A	377234	0.175	0.016	0.003	8.1e-05	<0.001	56908	0.175	-0.002	0.002	1.23e-06	0.49
Self Report	Moderate-to-Vigorous PA	VAT	rs2988004	9	37044388	T	G	377234	0.558	-0.013	0.002	9.18e-05	<0.001	56908	0.557	-0.002	0.002	4.25e-06	0.2
Self Report	Moderate-to-Vigorous PA	VAT	rs35650232	19	49259973	T	G	377234	0.779	-0.013	0.003	5.88e-05	<0.001	56908	0.779	0.001	0.002	4.11e-07	0.69
Self Report	Moderate-to-Vigorous PA	VAT	rs3810496	20	62406886	T	C	377234	0.384	0.011	0.002	6.14e-05	<0.001	56908	0.383	-0.008	0.002	5.23e-05	<0.001
Self Report	Moderate-to-Vigorous PA	VAT	rs3936938	1	181031797	G	A	377234	0.403	-0.011	0.002	6.11e-05	<0.001	56908	0.403	-0.002	0.002	2.89e-06	0.29
Self Report	Moderate-to-Vigorous PA	VAT	rs4281659	15	61844443	T	C	377234	0.865	0.017	0.003	7.53e-05	<0.001	56908	0.866	0.003	0.003	4.44e-06	0.19
Self Report	Moderate-to-Vigorous PA	VAT	rs429358	19	45411941	T	C	377234	0.846	-0.022	0.003	0.000138	<0.001	56908	0.845	0.015	0.002	9.87e-05	<0.001
Self Report	Moderate-to-Vigorous PA	VAT	rs4304660	10	22295747	G	A	377234	0.273	-0.011	0.002	5.58e-05	<0.001	56908	0.273	0.006	0.002	2.38e-05	0.0024
Self Report	Moderate-to-Vigorous PA	VAT	rs466727	20	15626740	G	C	377234	0.329	0.011	0.002	5.77e-05	<0.001	56908	0.329	0.001	0.002	2.85e-07	0.74
Self Report	Moderate-to-Vigorous PA	VAT	rs4787924	16	24264538	G	A	377234	0.475	-0.011	0.002	6.41e-05	<0.001	56908	0.475	-0.001	0.002	8.34e-07	0.57
Self Report	Moderate-to-Vigorous PA	VAT	rs4800990	18	53197944	C	T	377234	0.434	-0.011	0.002	6.02e-05	<0.001	56908	0.433	0	0.002	1.83e-07	0.79
Self Report	Moderate-to-Vigorous PA	VAT	rs4821271	22	35004093	G	C	377234	0.218	0.013	0.003	6.69e-05	<0.001	56908	0.218	-0.002	0.002	1.35e-06	0.47
Self Report	Moderate-to-Vigorous PA	VAT	rs4850842	2	199198626	G	A	377234	0.43	-0.012	0.002	7.13e-05	<0.001	56908	0.429	-0.003	0.002	9.6e-06	0.054
Self Report	Moderate-to-Vigorous PA	VAT	rs4872389	8	25909499	C	T	377234	0.77	-0.012	0.003	5.56e-05	<0.001	56908	0.77	-0.002	0.002	2.89e-06	0.29
Self Report	Moderate-to-Vigorous PA	VAT	rs4886868	15	74353561	T	G	377234	0.414	-0.012	0.002	8.07e-05	<0.001	56908	0.415	0.001	0.002	2.41e-07	0.76
Self Report	Moderate-to-Vigorous PA	VAT	rs4906229	14	103057511	A	C	377234	0.245	-0.013	0.003	6.66e-05	<0.001	56908	0.245	0.001	0.002	4.69e-07	0.67
Self Report	Moderate-to-Vigorous PA	VAT	rs527737	11	65884800	C	T	377234	0.422	-0.012	0.002	7.78e-05	<0.001	56908	0.423	0.007	0.002	4.35e-05	<0.001
Self Report	Moderate-to-Vigorous PA	VAT	rs56293069	7	8621822	G	C	377234	0.754	0.014	0.003	7.81e-05	<0.001	56908	0.753	0	0.002	1.66e-07	0.8
Self Report	Moderate-to-Vigorous PA	VAT	rs56947091	5	88160354	C	T	377234	0.49	-0.011	0.002	7.04e-05	<0.001	56908	0.489	0.003	0.002	5.93e-06	0.13
Self Report	Moderate-to-Vigorous PA	VAT	rs61301535	16	3675692	C	G	377234	0.987	-0.046	0.01	5.74e-05	<0.001	56908	0.987	0.008	0.008	2.78e-06	0.3
Self Report	Moderate-to-Vigorous PA	VAT	rs61780535	1	31620930	C	T	377234	0.798	0.014	0.003	6.97e-05	<0.001	56908	0.798	-0.005	0.002	1.18e-05	0.033
Self Report	Moderate-to-Vigorous PA	VAT	rs61928076	12	53730164	G	A	377234	0.955	-0.024	0.005	5.6e-05	<0.001	56908	0.955	0.006	0.004	5.93e-06	0.13
Self Report	Moderate-to-Vigorous PA	VAT	rs61975407	14	55568276	C	T	377234	0.452	-0.011	0.002	6e-05	<0.001	56908	0.452	-0.003	0.002	8.55e-06	0.069
Self Report	Moderate-to-Vigorous PA	VAT	rs62352768	4	167478536	T	A	377234	0.955	-0.028	0.006	5.86e-05	<0.001	56908	0.955	0.002	0.005	3.08e-07	0.73
Self Report	Moderate-to-Vigorous PA	VAT	rs6497882	16	25692849	A	G	377234	0.404	0.011	0.002	5.74e-05	<0.001	56908	0.405	-0.001	0.002	5.65e-07	0.64
Self Report	Moderate-to-Vigorous PA	VAT	rs662638	11	57686764	T	C	377234	0.444	0.012	0.002	7.4e-05	<0.001	56908	0.443	-0.001	0.002	1.23e-06	0.49
Self Report	Moderate-to-Vigorous PA	VAT	rs67432617	8	104812820	A	C	377234	0.805	0.015	0.003	7.88e-05	<0.001	56908	0.805	0	0.002	1.19e-07	0.83
Self Report	Moderate-to-Vigorous PA	VAT	rs6743932	2	35005351	G	A	377234	0.803	-0.013	0.003	5.62e-05	<0.001	56908	0.802	0.002	0.002	1.99e-06	0.38
Self Report	Moderate-to-Vigorous PA	VAT	rs6812265	4	139726791	C	T	377234	0.548	0.011	0.002	6.92e-05	<0.001	56908	0.549	-0.001	0.002	4.4e-07	0.68
Self Report	Moderate-to-Vigorous PA	VAT	rs710187	22	38204089	C	T	377234	0.442	0.01	0.002	5.95e-05	<0.001	56908	0.442	0.001	0.002	5e-07	0.66
Self Report	Moderate-to-Vigorous PA	VAT	rs719263	22	49685455	T	C	377234	0.195	-0.013	0.003	5.83e-05	<0.001	56908	0.195	0.006	0.002	2.25e-05	0.0032
Self Report	Moderate-to-Vigorous PA	VAT	rs7233752	18	67399208	A	G	377234	0.805	0.013	0.003	5.67e-05	<0.001	56908	0.805	-0.004	0.002	9.29e-06	0.058
Self Report	Moderate-to-Vigorous PA	VAT	rs72638967	4	65176402	C	T	377234	0.981	-0.038	0.008	5.93e-05	<0.001	56908	0.981	-0.004	0.006	9.24e-07	0.55
Self Report	Moderate-to-Vigorous PA	VAT	rs72920838	18	49514720	C	T	377234	0.889	0.017	0.004	6.02e-05	<0.001	56908	0.889	-0.005	0.003	9.76e-06	0.052
Self Report	Moderate-to-Vigorous PA	VAT	rs7326482	13	54037803	G	T	377234	0.385	-0.013	0.002	8.47e-05	<0.001	56908	0.383	0.007	0.002	4.18e-05	<0.001
Self Report	Moderate-to-Vigorous PA	VAT	rs749256	1	156884365	T	C	377234	0.25	0.013	0.003	6.85e-05	<0.001	56908	0.249	-0.003	0.002	5.63e-06	0.14
Self Report	Moderate-to-Vigorous PA	VAT	rs7508365	19	13151477	T	C	377234	0.28	-0.011	0.002	5.7e-05	<0.001	56908	0.279	0.003	0.002	6.6e-06	0.11
Self Report	Moderate-to-Vigorous PA	VAT	rs7652008	3	127160434	T	C	377234	0.537	-0.011	0.002	6.11e-05	<0.001	56908	0.538	0.003	0.002	5.93e-06	0.13
Self Report	Moderate-to-Vigorous PA	VAT	rs7690846	4	113988045	T	C	377234	0.484	0.01	0.002	5.84e-05	<0.001	56908	0.484	-0.003	0.002	7.62e-06	0.086
Self Report	Moderate-to-Vigorous PA	VAT	rs77742115	5	18330424	T	C	377234	0.862	-0.018	0.003	8.74e-05	<0.001	56908	0.862	0.001	0.002	4.11e-07	0.69
Self Report	Moderate-to-Vigorous PA	VAT	rs7804463	7	133447651	T	C	377234	0.53	0.015	0.002	0.000122	<0.001	56908	0.53	-0.002	0.002	4.44e-06	0.19
Self Report	Moderate-to-Vigorous PA	VAT	rs80014012	10	86318511	A	C	377234	0.925	-0.02	0.004	5.93e-05	<0.001	56908	0.925	-0.004	0.003	4.65e-06	0.18
Self Report	Moderate-to-Vigorous PA	VAT	rs8058726	16	83207316	A	T	377234	0.712	-0.011	0.002	5.84e-05	<0.001	56908	0.712	0	0.002	0	1
Self Report	Moderate-to-Vigorous PA	VAT	rs862490	17	35850275	T	C	377234	0.358	-0.011	0.002	5.84e-05	<0.001	56908	0.358	-0.001	0.002	3.32e-07	0.72
Self Report	Moderate-to-Vigorous PA	VAT	rs877483	3	53846741	T	C	377234	0.433	0.012	0.002	8e-05	<0.001	56908	0.434	-0.005	0.002	2.57e-05	0.0016
Self Report	Moderate-to-Vigorous PA	VAT	rs921915	7	50228581	T	C	377234	0.412	-0.014	0.002	0.000102	<0.001	56908	0.413	0	0.002	1.46e-08	0.94
Self Report	Moderate-to-Vigorous PA	VAT	rs9446663	6	73180747	C	A	377234	0.704	0.013	0.002	7.29e-05	<0.001	56908	0.704	0.007	0.002	4.09e-05	<0.001
Self Report	Moderate-to-Vigorous PA	VAT	rs9579775	13	20616557	A	C	377234	0.865	0.016	0.003	5.83e-05	<0.001	56908	0.865	-0.01	0.003	3.82e-05	<0.001
Self Report	Moderate-to-Vigorous PA	VAT	rs9584870	13	99245866	T	C	377234	0.633	-0.011	0.002	5.9e-05	<0.001	56908	0.634	0.005	0.002	2.26e-05	0.0031
Self Report	Moderate-to-Vigorous PA	VAT	rs974471	14	29685328	G	A	377234	0.229	0.014	0.003	7.13e-05	<0.001	56908	0.228	-0.009	0.002	4.55e-05	<0.001
Self Report	Moderate-to-Vigorous PA	VAT	rs9919769	12	126827971	A	G	377234	0.774	-0.012	0.003	5.88e-05	<0.001	56908	0.774	0.001	0.002	1.18e-06	0.5
Self Report	Vigorous PA	VAT	rs10105796	8	136882909	T	C	261055	0.74	0.007	0.001	6.46e-05	<0.001	56908	0.74	0.003	0.002	4.25e-06	0.2
Self Report	Vigorous PA	VAT	rs10943642	6	80089635	G	A	261055	0.791	0.008	0.002	6.53e-05	<0.001	56908	0.791	-0.004	0.002	7.16e-06	0.096
Self Report	Vigorous PA	VAT	rs112532934	3	154079769	A	G	261055	0.957	-0.015	0.003	5.97e-05	<0.001	56908	0.957	0.001	0.004	3.08e-07	0.73
Self Report	Vigorous PA	VAT	rs114254306	5	132484245	G	A	261055	0.982	-0.024	0.005	6e-05	<0.001	56908	0.982	-0.001	0.007	6.92e-08	0.87
Self Report	Vigorous PA	VAT	rs115181288	1	114130641	C	T	261055	0.945	-0.013	0.003	5.74e-05	<0.001	56908	0.945	0.003	0.004	1.54e-06	0.44
Self Report	Vigorous PA	VAT	rs11575919	22	41072333	A	G	261055	0.893	-0.011	0.002	6.89e-05	<0.001	56908	0.893	-0.002	0.003	8.34e-07	0.57
Self Report	Vigorous PA	VAT	rs11643648	16	78514583	C	T	261055	0.926	-0.012	0.003	6.11e-05	<0.001	56908	0.926	0.001	0.003	8.04e-08	0.86
Self Report	Vigorous PA	VAT	rs12046141	1	88458879	G	A	261055	0.712	0.007	0.001	6.3e-05	<0.001	56908	0.712	-0.002	0.002	2.78e-06	0.3
Self Report	Vigorous PA	VAT	rs12480549	20	14148547	G	A	261055	0.806	-0.008	0.002	5.73e-05	<0.001	56908	0.806	0.004	0.002	1.1e-05	0.039
Self Report	Vigorous PA	VAT	rs1248860	3	85015779	G	A	261055	0.484	-0.01	0.001	0.000146	<0.001	56908	0.484	-0.003	0.002	1.04e-05	0.045
Self Report	Vigorous PA	VAT	rs12692667	2	163832448	T	G	261055	0.722	-0.007	0.001	5.74e-05	<0.001	56908	0.721	0	0.002	6.92e-08	0.87
Self Report	Vigorous PA	VAT	rs13182417	5	51233486	G	A	261055	0.961	-0.018	0.003	7.2e-05	<0.001	56908	0.961	-0.002	0.004	6.36e-07	0.62
Self Report	Vigorous PA	VAT	rs13243553	7	133506955	G	A	261055	0.608	0.009	0.001	0.000112	<0.001	56908	0.609	-0.005	0.002	2.29e-05	0.0029
Self Report	Vigorous PA	VAT	rs13375273	1	181819083	G	A	261055	0.677	-0.007	0.001	5.95e-05	<0.001	56908	0.676	0	0.002	1.83e-07	0.79
Self Report	Vigorous PA	VAT	rs138557223	2	229577701	C	T	261055	0.985	-0.027	0.006	6.02e-05	<0.001	56908	0.985	0.016	0.007	1.2e-05	0.031
Self Report	Vigorous PA	VAT	rs140507	22	23646512	C	T	261055	0.537	-0.006	0.001	5.6e-05	<0.001	56908	0.537	0.001	0.002	9.71e-07	0.54
Self Report	Vigorous PA	VAT	rs141344324	20	10623652	A	T	261055	0.99	0.032	0.007	6.08e-05	<0.001	56908	0.99	-0.004	0.009	4.4e-07	0.68
Self Report	Vigorous PA	VAT	rs141813169	8	14855447	C	T	261055	0.961	-0.016	0.003	5.63e-05	<0.001	56908	0.961	-0.002	0.004	4.69e-07	0.67
Self Report	Vigorous PA	VAT	rs1461584	14	98637996	A	G	261055	0.794	-0.009	0.002	7.63e-05	<0.001	56908	0.795	-0.006	0.002	1.74e-05	0.0094
Self Report	Vigorous PA	VAT	rs147926280	9	95976609	G	A	261055	0.969	0.018	0.004	5.63e-05	<0.001	56908	0.969	0.003	0.005	7.92e-07	0.58
Self Report	Vigorous PA	VAT	rs149921656	4	134489715	G	T	261055	0.987	-0.03	0.006	6.49e-05	<0.001	56908	0.987	0.003	0.008	3.84e-07	0.7
Self Report	Vigorous PA	VAT	rs1573062	1	117871403	C	T	261055	0.648	-0.007	0.001	6.14e-05	<0.001	56908	0.648	0.007	0.002	3.65e-05	<0.001
Self Report	Vigorous PA	VAT	rs17219084	16	53855600	A	G	261055	0.624	-0.006	0.001	5.76e-05	<0.001	56908	0.624	0.001	0.002	7.11e-07	0.6
Self Report	Vigorous PA	VAT	rs17597778	4	162902865	T	G	261055	0.888	0.01	0.002	5.73e-05	<0.001	56908	0.888	-0.001	0.003	2.21e-07	0.77
Self Report	Vigorous PA	VAT	rs184335918	1	87092166	T	C	261055	0.922	-0.012	0.003	5.88e-05	<0.001	56908	0.922	-0.001	0.003	5e-07	0.66
Self Report	Vigorous PA	VAT	rs2189464	7	8633758	C	T	261055	0.752	0.008	0.002	6.65e-05	<0.001	56908	0.751	-0.001	0.002	8.78e-07	0.56
Self Report	Vigorous PA	VAT	rs2663648	2	210491839	C	T	261055	0.884	-0.011	0.002	7.17e-05	<0.001	56908	0.883	0	0.003	6.5e-09	0.96
Self Report	Vigorous PA	VAT	rs2922754	2	225909316	G	A	261055	0.242	0.007	0.002	5.95e-05	<0.001	56908	0.242	-0.003	0.002	6.25e-06	0.12
Self Report	Vigorous PA	VAT	rs328902	7	35020843	C	T	261055	0.685	-0.009	0.001	0.000102	<0.001	56908	0.685	-0.003	0.002	5.93e-06	0.13
Self Report	Vigorous PA	VAT	rs35907069	2	69940780	G	A	261055	0.911	-0.011	0.002	6.22e-05	<0.001	56908	0.911	0.004	0.003	4.65e-06	0.18
Self Report	Vigorous PA	VAT	rs3781411	10	126715436	C	T	261055	0.876	0.013	0.002	0.000105	<0.001	56908	0.876	-0.002	0.003	1.75e-06	0.41
Self Report	Vigorous PA	VAT	rs4556111	8	113382838	T	C	261055	0.466	-0.007	0.001	7.15e-05	<0.001	56908	0.466	0.005	0.002	1.94e-05	0.0061
Self Report	Vigorous PA	VAT	rs464348	3	18611283	A	G	261055	0.301	0.007	0.001	6.18e-05	<0.001	56908	0.301	-0.005	0.002	1.59e-05	0.013
Self Report	Vigorous PA	VAT	rs4656024	1	88724815	T	G	261055	0.419	0.006	0.001	5.81e-05	<0.001	56908	0.421	-0.004	0.002	1.1e-05	0.039
Self Report	Vigorous PA	VAT	rs5742915	15	74336633	T	C	261055	0.539	-0.007	0.001	6.68e-05	<0.001	56908	0.54	0.003	0.002	5.63e-06	0.14
Self Report	Vigorous PA	VAT	rs58242881	10	99699028	G	A	261055	0.793	0.009	0.002	7.61e-05	<0.001	56908	0.794	-0.006	0.002	2.17e-05	0.0038
Self Report	Vigorous PA	VAT	rs61866271	10	64305946	G	C	261055	0.983	0.028	0.005	7.72e-05	<0.001	56908	0.984	-0.002	0.007	3.32e-07	0.72
Self Report	Vigorous PA	VAT	rs61897072	11	116137150	C	T	261055	0.805	0.009	0.002	7.02e-05	<0.001	56908	0.805	-0.003	0.002	4.87e-06	0.17
Self Report	Vigorous PA	VAT	rs62097177	18	32119363	A	T	261055	0.97	0.019	0.004	5.81e-05	<0.001	56908	0.97	-0.011	0.005	1.14e-05	0.036
Self Report	Vigorous PA	VAT	rs6432141	2	10913170	A	G	261055	0.446	0.006	0.001	5.95e-05	<0.001	56908	0.446	-0.006	0.002	3.1e-05	<0.001
Self Report	Vigorous PA	VAT	rs6562062	13	60503637	G	A	261055	0.372	-0.006	0.001	5.76e-05	<0.001	56908	0.372	0.005	0.002	2.42e-05	0.0022
Self Report	Vigorous PA	VAT	rs6667222	1	154253661	A	C	261055	0.748	0.009	0.002	8.79e-05	<0.001	56908	0.749	0	0.002	5.89e-08	0.88
Self Report	Vigorous PA	VAT	rs6689056	1	24364531	G	A	261055	0.674	0.008	0.001	7.75e-05	<0.001	56908	0.675	-0.001	0.002	8.34e-07	0.57
Self Report	Vigorous PA	VAT	rs67432617	8	104812820	A	C	261055	0.806	0.008	0.002	5.67e-05	<0.001	56908	0.805	0	0.002	1.19e-07	0.83
Self Report	Vigorous PA	VAT	rs72714728	14	58429091	G	A	261055	0.993	-0.036	0.008	5.81e-05	<0.001	56908	0.993	-0.002	0.01	1.49e-07	0.81
Self Report	Vigorous PA	VAT	rs72737787	9	37336741	G	A	261055	0.648	-0.006	0.001	5.9e-05	<0.001	56908	0.648	-0.001	0.002	1.07e-06	0.52
Self Report	Vigorous PA	VAT	rs72924609	18	49616240	G	A	261055	0.875	0.01	0.002	7.32e-05	<0.001	56908	0.875	-0.004	0.003	6.6e-06	0.11
Self Report	Vigorous PA	VAT	rs72928932	11	66950585	T	G	261055	0.918	-0.013	0.002	7.68e-05	<0.001	56908	0.918	0.006	0.003	9.29e-06	0.058
Self Report	Vigorous PA	VAT	rs72993373	1	154844227	T	C	261055	0.971	-0.019	0.004	6.26e-05	<0.001	56908	0.971	0.006	0.005	3.57e-06	0.24
Self Report	Vigorous PA	VAT	rs73912051	2	2374354	T	C	261055	0.937	0.012	0.003	5.55e-05	<0.001	56908	0.937	-0.004	0.004	3.02e-06	0.28
Self Report	Vigorous PA	VAT	rs74427596	4	139033778	G	C	261055	0.954	-0.015	0.003	6e-05	<0.001	56908	0.954	0.003	0.004	1.29e-06	0.48
Self Report	Vigorous PA	VAT	rs7715147	5	60053220	C	A	261055	0.758	-0.007	0.002	5.57e-05	<0.001	56908	0.759	0.003	0.002	5.93e-06	0.13
Self Report	Vigorous PA	VAT	rs7749938	6	10362511	C	T	261055	0.985	0.026	0.006	5.83e-05	<0.001	56908	0.985	-0.008	0.007	3.02e-06	0.28
Self Report	Vigorous PA	VAT	rs77742115	5	18330424	T	C	261055	0.862	-0.01	0.002	6.62e-05	<0.001	56908	0.862	0.001	0.002	4.11e-07	0.69
Self Report	Vigorous PA	VAT	rs79553700	1	35315272	G	A	261055	0.995	0.042	0.009	5.55e-05	<0.001	56908	0.995	-0.005	0.012	3.57e-07	0.71
Self Report	Vigorous PA	VAT	rs8102851	19	32208909	T	C	261055	0.783	0.008	0.002	6.02e-05	<0.001	56908	0.783	-0.006	0.002	2.22e-05	0.0034
Self Report	Vigorous PA	VAT	rs9276758	6	32772975	G	A	261055	0.688	0.008	0.001	8.54e-05	<0.001	56908	0.689	-0.001	0.002	1.12e-06	0.51
Self Report	Vigorous PA	VAT	rs9384757	6	111177160	G	A	261055	0.79	-0.008	0.002	6.08e-05	<0.001	56908	0.79	0	0.002	1.62e-09	0.98
Self Report	Vigorous PA	VAT	rs9387216	6	97729953	C	A	261055	0.748	-0.008	0.002	7.17e-05	<0.001	56908	0.748	0	0.002	4.94e-08	0.89
Self Report	Vigorous PA	VAT	rs974471	14	29685328	G	A	261055	0.228	0.007	0.002	5.62e-05	<0.001	56908	0.228	-0.009	0.002	4.55e-05	<0.001
Self Report	Vigorous PA	VAT	rs9984123	21	45515347	T	G	261055	0.34	-0.007	0.001	6.11e-05	<0.001	56908	0.342	0.004	0.002	1.5e-05	0.016
Self Report	Strenuous Sports & Other Exercises	VAT	rs1055595	9	92213923	T	G	350492	0.492	0.005	0.001	6.05e-05	<0.001	56908	0.492	-0.006	0.002	3.06e-05	<0.001
Self Report	Strenuous Sports & Other Exercises	VAT	rs10821729	10	62099173	C	T	350492	0.49	-0.005	0.001	5.68e-05	<0.001	56908	0.49	0.001	0.002	4.69e-07	0.67
Self Report	Strenuous Sports & Other Exercises	VAT	rs11000785	10	75575963	T	C	350492	0.284	0.006	0.001	7.04e-05	<0.001	56908	0.284	-0.004	0.002	1.09e-05	0.04
Self Report	Strenuous Sports & Other Exercises	VAT	rs11143585	9	76007045	C	T	350492	0.751	0.007	0.001	7.06e-05	<0.001	56908	0.751	-0.002	0.002	1.99e-06	0.38
Self Report	Strenuous Sports & Other Exercises	VAT	rs11158800	14	69747046	G	A	350492	0.498	0.005	0.001	6.14e-05	<0.001	56908	0.498	-0.005	0.002	2.4e-05	0.0023
Self Report	Strenuous Sports & Other Exercises	VAT	rs111901094	19	19513570	G	T	350492	0.818	0.009	0.001	9.34e-05	<0.001	56908	0.817	-0.007	0.002	2.28e-05	0.003
Self Report	Strenuous Sports & Other Exercises	VAT	rs11210230	1	73860239	T	C	350492	0.881	-0.009	0.002	7.4e-05	<0.001	56908	0.881	-0.001	0.003	8.34e-07	0.57
Self Report	Strenuous Sports & Other Exercises	VAT	rs113428529	10	133962285	A	C	350492	0.863	0.009	0.002	7.08e-05	<0.001	56908	0.863	-0.001	0.003	6.73e-07	0.61
Self Report	Strenuous Sports & Other Exercises	VAT	rs11625806	14	37022739	G	A	350492	0.592	-0.006	0.001	6.55e-05	<0.001	56908	0.592	0.003	0.002	5.93e-06	0.13
Self Report	Strenuous Sports & Other Exercises	VAT	rs11628052	14	100181563	A	G	350492	0.537	-0.006	0.001	6.62e-05	<0.001	56908	0.537	-0.001	0.002	5e-07	0.66
Self Report	Strenuous Sports & Other Exercises	VAT	rs11687833	2	199499356	C	T	350492	0.597	0.006	0.001	6.59e-05	<0.001	56908	0.597	-0.001	0.002	3.32e-07	0.72
Self Report	Strenuous Sports & Other Exercises	VAT	rs11735491	4	181064844	T	A	350492	0.537	0.005	0.001	5.97e-05	<0.001	56908	0.537	-0.005	0.002	2.02e-05	0.0052
Self Report	Strenuous Sports & Other Exercises	VAT	rs117774086	12	73519003	T	C	350492	0.984	0.022	0.005	6.02e-05	<0.001	56908	0.984	-0.004	0.007	6.73e-07	0.61
Self Report	Strenuous Sports & Other Exercises	VAT	rs118165004	20	62670369	C	T	350492	0.824	0.007	0.001	6.43e-05	<0.001	56908	0.824	-0.003	0.002	6.25e-06	0.12
Self Report	Strenuous Sports & Other Exercises	VAT	rs1200154	1	169093101	G	A	350492	0.407	-0.006	0.001	8.01e-05	<0.001	56908	0.407	0.003	0.002	7.25e-06	0.094
Self Report	Strenuous Sports & Other Exercises	VAT	rs12031924	1	96877405	C	T	350492	0.76	0.006	0.001	6.35e-05	<0.001	56908	0.76	-0.002	0.002	3.72e-06	0.23
Self Report	Strenuous Sports & Other Exercises	VAT	rs1265178	6	31161229	G	A	350492	0.762	0.007	0.001	8.12e-05	<0.001	56908	0.762	-0.007	0.002	3.29e-05	<0.001
Self Report	Strenuous Sports & Other Exercises	VAT	rs12821008	12	49474605	C	T	350492	0.594	-0.006	0.001	7.29e-05	<0.001	56908	0.594	-0.001	0.002	1.61e-06	0.43
Self Report	Strenuous Sports & Other Exercises	VAT	rs12833054	12	109890955	G	A	350492	0.815	0.007	0.001	6.14e-05	<0.001	56908	0.815	0	0.002	8.04e-08	0.86
Self Report	Strenuous Sports & Other Exercises	VAT	rs1293865	7	101935528	G	C	350492	0.785	-0.006	0.001	5.86e-05	<0.001	56908	0.785	-0.001	0.002	9.24e-07	0.55
Self Report	Strenuous Sports & Other Exercises	VAT	rs13180692	5	163366679	G	A	350492	0.559	-0.006	0.001	7.26e-05	<0.001	56908	0.56	0.001	0.002	2.21e-07	0.77
Self Report	Strenuous Sports & Other Exercises	VAT	rs13270385	8	105164753	T	C	350492	0.697	-0.006	0.001	5.68e-05	<0.001	56908	0.697	0.001	0.002	2.62e-07	0.75
Self Report	Strenuous Sports & Other Exercises	VAT	rs13284832	9	128435126	A	C	350492	0.571	-0.005	0.001	6e-05	<0.001	56908	0.572	-0.004	0.002	1.18e-05	0.033
Self Report	Strenuous Sports & Other Exercises	VAT	rs1345660	5	120255185	G	T	350492	0.413	-0.005	0.001	5.56e-05	<0.001	56908	0.414	0.004	0.002	1.19e-05	0.032
Self Report	Strenuous Sports & Other Exercises	VAT	rs144949097	4	28837885	G	A	350492	0.978	-0.02	0.004	7.1e-05	<0.001	56908	0.978	0.01	0.006	7.08e-06	0.098
Self Report	Strenuous Sports & Other Exercises	VAT	rs148968456	19	40976589	G	T	350492	0.988	-0.026	0.005	6.35e-05	<0.001	56908	0.988	-0.002	0.008	1.34e-07	0.82
Self Report	Strenuous Sports & Other Exercises	VAT	rs150639066	4	55586547	G	A	350492	0.987	0.024	0.005	5.73e-05	<0.001	56908	0.987	0.018	0.008	1.36e-05	0.022
Self Report	Strenuous Sports & Other Exercises	VAT	rs159544	5	60489247	A	G	350492	0.605	-0.007	0.001	9.77e-05	<0.001	56908	0.606	0.001	0.002	9.71e-07	0.54
Self Report	Strenuous Sports & Other Exercises	VAT	rs166840	17	19799698	G	A	350492	0.588	0.008	0.001	0.000117	<0.001	56908	0.588	0.002	0.002	3.15e-06	0.27
Self Report	Strenuous Sports & Other Exercises	VAT	rs17382832	12	23735919	T	C	350492	0.915	0.01	0.002	6.18e-05	<0.001	56908	0.915	-0.001	0.003	5.65e-07	0.64
Self Report	Strenuous Sports & Other Exercises	VAT	rs17430142	8	56164042	C	T	350492	0.959	0.014	0.003	6.08e-05	<0.001	56908	0.959	-0.013	0.004	2.26e-05	0.0031
Self Report	Strenuous Sports & Other Exercises	VAT	rs17541344	15	52600382	G	A	350492	0.991	-0.036	0.008	5.77e-05	<0.001	56908	0.991	0.017	0.012	5.63e-06	0.14
Self Report	Strenuous Sports & Other Exercises	VAT	rs17565975	11	111586950	G	A	350492	0.437	0.005	0.001	5.77e-05	<0.001	56908	0.436	0.003	0.002	8.61e-06	0.068
Self Report	Strenuous Sports & Other Exercises	VAT	rs1869111	11	80198869	A	T	350492	0.786	0.006	0.001	5.61e-05	<0.001	56908	0.786	-0.002	0.002	2.89e-06	0.29
Self Report	Strenuous Sports & Other Exercises	VAT	rs2108690	7	35082809	C	T	350492	0.691	-0.006	0.001	5.73e-05	<0.001	56908	0.691	-0.003	0.002	7.43e-06	0.09
Self Report	Strenuous Sports & Other Exercises	VAT	rs2148201	10	2323505	G	A	350492	0.508	-0.006	0.001	6.81e-05	<0.001	56908	0.509	0	0.002	6.5e-09	0.96
Self Report	Strenuous Sports & Other Exercises	VAT	rs216211	17	2242417	A	G	350492	0.248	0.007	0.001	6.75e-05	<0.001	56908	0.248	0.004	0.002	1.3e-05	0.025
Self Report	Strenuous Sports & Other Exercises	VAT	rs2238046	12	2299998	A	C	350492	0.612	-0.006	0.001	6.5e-05	<0.001	56908	0.612	0	0.002	4.94e-08	0.89
Self Report	Strenuous Sports & Other Exercises	VAT	rs2278480	3	25635743	T	C	350492	0.713	-0.006	0.001	5.71e-05	<0.001	56908	0.713	0.006	0.002	2.23e-05	0.0033
Self Report	Strenuous Sports & Other Exercises	VAT	rs246743	7	140690009	T	G	350492	0.147	0.008	0.002	6.66e-05	<0.001	56908	0.146	-0.004	0.002	7.57e-06	0.087
Self Report	Strenuous Sports & Other Exercises	VAT	rs2470893	15	75019449	C	T	350492	0.67	0.006	0.001	7.84e-05	<0.001	56908	0.67	-0.005	0.002	1.97e-05	0.0058
Self Report	Strenuous Sports & Other Exercises	VAT	rs2675089	2	183914247	G	A	350492	0.11	0.009	0.002	6.35e-05	<0.001	56908	0.109	-0.004	0.003	4.65e-06	0.18
Self Report	Strenuous Sports & Other Exercises	VAT	rs2749778	4	3351705	T	C	350492	0.404	0.006	0.001	7.53e-05	<0.001	56908	0.404	-0.003	0.002	6.99e-06	0.1
Self Report	Strenuous Sports & Other Exercises	VAT	rs2821549	1	111184045	G	C	350492	0.721	0.006	0.001	6.26e-05	<0.001	56908	0.721	-0.005	0.002	1.47e-05	0.017
Self Report	Strenuous Sports & Other Exercises	VAT	rs28551054	16	8292028	A	C	350492	0.763	-0.007	0.001	6.4e-05	<0.001	56908	0.764	0.004	0.002	9.07e-06	0.061
Self Report	Strenuous Sports & Other Exercises	VAT	rs2871340	2	100884117	G	T	350492	0.503	-0.006	0.001	7.48e-05	<0.001	56908	0.503	0.006	0.002	3.45e-05	<0.001
Self Report	Strenuous Sports & Other Exercises	VAT	rs288070	2	210408477	G	A	350492	0.902	-0.011	0.002	8.38e-05	<0.001	56908	0.902	0.002	0.003	1.61e-06	0.43
Self Report	Strenuous Sports & Other Exercises	VAT	rs2994326	1	243651026	T	C	350492	0.187	-0.008	0.001	7.94e-05	<0.001	56908	0.187	0.005	0.002	1.18e-05	0.033
Self Report	Strenuous Sports & Other Exercises	VAT	rs336620	3	18628793	C	G	350492	0.302	0.006	0.001	7.17e-05	<0.001	56908	0.302	-0.004	0.002	1.28e-05	0.026
Self Report	Strenuous Sports & Other Exercises	VAT	rs354364	6	66304163	T	C	350492	0.75	-0.006	0.001	5.57e-05	<0.001	56908	0.75	0	0.002	1.46e-08	0.94
Self Report	Strenuous Sports & Other Exercises	VAT	rs35518360	4	103146890	A	T	350492	0.916	0.011	0.002	7.48e-05	<0.001	56908	0.916	-0.017	0.003	7.17e-05	<0.001
Self Report	Strenuous Sports & Other Exercises	VAT	rs35786746	5	176463551	C	T	350492	0.813	0.007	0.001	6.6e-05	<0.001	56908	0.812	-0.002	0.002	1.54e-06	0.44
Self Report	Strenuous Sports & Other Exercises	VAT	rs3771544	2	69771484	C	T	350492	0.608	-0.006	0.001	6.11e-05	<0.001	56908	0.608	-0.001	0.002	6.36e-07	0.62
Self Report	Strenuous Sports & Other Exercises	VAT	rs4084828	2	118893347	C	T	350492	0.463	-0.006	0.001	6.76e-05	<0.001	56908	0.463	0.002	0.002	4.44e-06	0.19
Self Report	Strenuous Sports & Other Exercises	VAT	rs4411372	13	99130423	T	C	350492	0.72	-0.007	0.001	8.36e-05	<0.001	56908	0.72	0.005	0.002	1.99e-05	0.0055
Self Report	Strenuous Sports & Other Exercises	VAT	rs4432322	18	22689878	T	C	350492	0.359	-0.005	0.001	5.63e-05	<0.001	56908	0.359	0.004	0.002	1.25e-05	0.028
Self Report	Strenuous Sports & Other Exercises	VAT	rs4601350	8	113329886	C	T	350492	0.451	-0.006	0.001	6.3e-05	<0.001	56908	0.451	0.005	0.002	2.36e-05	0.0025
Self Report	Strenuous Sports & Other Exercises	VAT	rs4743038	9	109645987	A	T	350492	0.802	0.007	0.001	5.7e-05	<0.001	56908	0.801	0	0.002	5.89e-08	0.88
Self Report	Strenuous Sports & Other Exercises	VAT	rs4811141	20	49851464	G	A	350492	0.127	-0.008	0.002	6.57e-05	<0.001	56908	0.126	0.001	0.003	2.85e-07	0.74
Self Report	Strenuous Sports & Other Exercises	VAT	rs4865667	5	50748173	C	T	350492	0.613	0.007	0.001	8.72e-05	<0.001	56908	0.613	-0.007	0.002	3.51e-05	<0.001
Self Report	Strenuous Sports & Other Exercises	VAT	rs4890829	18	74540433	C	T	350492	0.362	-0.006	0.001	6.22e-05	<0.001	56908	0.363	0.001	0.002	4.11e-07	0.69
Self Report	Strenuous Sports & Other Exercises	VAT	rs526231	5	102681381	C	T	350492	0.672	-0.006	0.001	5.95e-05	<0.001	56908	0.672	0.003	0.002	4.87e-06	0.17
Self Report	Strenuous Sports & Other Exercises	VAT	rs547118	11	57595062	C	G	350492	0.436	0.006	0.001	6.58e-05	<0.001	56908	0.435	-0.001	0.002	3.57e-07	0.71
Self Report	Strenuous Sports & Other Exercises	VAT	rs551243	11	66074483	G	C	350492	0.53	0.006	0.001	7.75e-05	<0.001	56908	0.531	-0.007	0.002	3.75e-05	<0.001
Self Report	Strenuous Sports & Other Exercises	VAT	rs55733505	10	16606002	C	G	350492	0.77	0.006	0.001	5.84e-05	<0.001	56908	0.77	-0.002	0.002	2.26e-06	0.35
Self Report	Strenuous Sports & Other Exercises	VAT	rs568546	11	107321156	C	T	350492	0.48	-0.005	0.001	6.11e-05	<0.001	56908	0.48	0.004	0.002	1.14e-05	0.036
Self Report	Strenuous Sports & Other Exercises	VAT	rs577525	10	99769388	T	C	350492	0.437	0.006	0.001	7.02e-05	<0.001	56908	0.438	-0.008	0.002	5.77e-05	<0.001
Self Report	Strenuous Sports & Other Exercises	VAT	rs62109945	19	13303940	T	C	350492	0.502	-0.006	0.001	6.92e-05	<0.001	56908	0.503	0.003	0.002	8.03e-06	0.078
Self Report	Strenuous Sports & Other Exercises	VAT	rs62253088	3	85400801	T	C	350492	0.327	0.011	0.001	0.000219	<0.001	56908	0.327	0.003	0.002	5.93e-06	0.13
Self Report	Strenuous Sports & Other Exercises	VAT	rs62422094	6	97966663	A	G	350492	0.763	-0.007	0.001	6.98e-05	<0.001	56908	0.763	0.009	0.002	4.84e-05	<0.001
Self Report	Strenuous Sports & Other Exercises	VAT	rs62442944	7	2015047	T	G	350492	0.814	-0.007	0.001	5.61e-05	<0.001	56908	0.814	0.01	0.002	5.46e-05	<0.001
Self Report	Strenuous Sports & Other Exercises	VAT	rs62472745	7	85740501	C	G	350492	0.786	-0.007	0.001	6.72e-05	<0.001	56908	0.786	-0.001	0.002	8.78e-07	0.56
Self Report	Strenuous Sports & Other Exercises	VAT	rs62499902	8	15201593	C	T	350492	0.91	0.009	0.002	5.66e-05	<0.001	56908	0.91	-0.007	0.003	1.47e-05	0.017
Self Report	Strenuous Sports & Other Exercises	VAT	rs6432141	2	10913170	A	G	350492	0.446	0.006	0.001	7.72e-05	<0.001	56908	0.446	-0.006	0.002	3.1e-05	<0.001
Self Report	Strenuous Sports & Other Exercises	VAT	rs6453439	5	78651037	C	T	350492	0.649	-0.006	0.001	6.22e-05	<0.001	56908	0.649	-0.003	0.002	7.72e-06	0.084
Self Report	Strenuous Sports & Other Exercises	VAT	rs6668637	1	204452295	A	G	350492	0.809	-0.007	0.001	5.62e-05	<0.001	56908	0.809	0.003	0.002	5.93e-06	0.13
Self Report	Strenuous Sports & Other Exercises	VAT	rs7031064	9	14455076	A	G	350492	0.517	-0.006	0.001	6.85e-05	<0.001	56908	0.517	0.007	0.002	4.44e-05	<0.001
Self Report	Strenuous Sports & Other Exercises	VAT	rs7034243	9	122688811	A	G	350492	0.659	-0.006	0.001	7.53e-05	<0.001	56908	0.659	-0.002	0.002	3.72e-06	0.23
Self Report	Strenuous Sports & Other Exercises	VAT	rs705692	1	7480217	C	T	350492	0.108	-0.009	0.002	6.59e-05	<0.001	56908	0.109	-0.003	0.003	2.66e-06	0.31
Self Report	Strenuous Sports & Other Exercises	VAT	rs7228225	18	53529456	A	T	350492	0.415	0.005	0.001	5.86e-05	<0.001	56908	0.416	-0.004	0.002	1.08e-05	0.041
Self Report	Strenuous Sports & Other Exercises	VAT	rs72813137	2	77767641	C	A	350492	0.98	-0.019	0.004	5.54e-05	<0.001	56908	0.98	-0.007	0.006	3.42e-06	0.25
Self Report	Strenuous Sports & Other Exercises	VAT	rs72910629	6	69761994	A	G	350492	0.864	0.009	0.002	7.36e-05	<0.001	56908	0.863	-0.011	0.003	5.39e-05	<0.001
Self Report	Strenuous Sports & Other Exercises	VAT	rs74256200	17	77656285	G	A	350492	0.971	-0.016	0.003	6.3e-05	<0.001	56908	0.971	-0.002	0.005	4.4e-07	0.68
Self Report	Strenuous Sports & Other Exercises	VAT	rs75276987	8	15873760	T	C	350492	0.918	-0.01	0.002	6.42e-05	<0.001	56908	0.918	0.002	0.003	6e-07	0.63
Self Report	Strenuous Sports & Other Exercises	VAT	rs75930676	14	71826547	T	C	350492	0.949	-0.016	0.003	9.55e-05	<0.001	56908	0.949	0.005	0.004	3.57e-06	0.24
Self Report	Strenuous Sports & Other Exercises	VAT	rs763187	6	166955738	A	G	350492	0.171	-0.008	0.002	6.89e-05	<0.001	56908	0.171	0.002	0.002	2.89e-06	0.29
Self Report	Strenuous Sports & Other Exercises	VAT	rs76846174	9	1093963	C	T	350492	0.977	-0.024	0.005	7.26e-05	<0.001	56908	0.977	-0.007	0.007	2.66e-06	0.31
Self Report	Strenuous Sports & Other Exercises	VAT	rs7718022	5	147941845	G	C	350492	0.487	-0.005	0.001	5.97e-05	<0.001	56908	0.487	0.001	0.002	1.48e-06	0.45
Self Report	Strenuous Sports & Other Exercises	VAT	rs7740107	6	130374461	T	A	350492	0.264	-0.006	0.001	6.6e-05	<0.001	56908	0.264	0.005	0.002	1.89e-05	0.0069
Self Report	Strenuous Sports & Other Exercises	VAT	rs77558140	2	5835047	T	C	350492	0.98	0.019	0.004	6.08e-05	<0.001	56908	0.98	-0.015	0.006	1.63e-05	0.012
Self Report	Strenuous Sports & Other Exercises	VAT	rs78147929	1	57622784	C	T	350492	0.924	0.01	0.002	5.79e-05	<0.001	56908	0.924	-0.001	0.003	1.05e-07	0.84
Self Report	Strenuous Sports & Other Exercises	VAT	rs78492346	18	50731947	A	G	350492	0.967	-0.015	0.003	6.05e-05	<0.001	56908	0.967	0.007	0.005	5.36e-06	0.15
Self Report	Strenuous Sports & Other Exercises	VAT	rs795973	4	140798487	A	G	350492	0.669	-0.006	0.001	6.39e-05	<0.001	56908	0.67	0.006	0.002	2.52e-05	0.0018
Self Report	Strenuous Sports & Other Exercises	VAT	rs8093216	18	33377051	G	A	350492	0.655	-0.006	0.001	6.36e-05	<0.001	56908	0.654	0.001	0.002	7.92e-07	0.58
Self Report	Strenuous Sports & Other Exercises	VAT	rs896302	6	98806496	C	T	350492	0.287	0.007	0.001	8.44e-05	<0.001	56908	0.286	-0.006	0.002	2.29e-05	0.0029
Self Report	Strenuous Sports & Other Exercises	VAT	rs9177	7	1787236	A	G	350492	0.51	0.006	0.001	6.75e-05	<0.001	56908	0.51	-0.003	0.002	6.25e-06	0.12
Self Report	Strenuous Sports & Other Exercises	VAT	rs9563168	13	54247827	G	A	350492	0.79	-0.007	0.001	6.02e-05	<0.001	56908	0.79	0.004	0.002	1.04e-05	0.045
Self Report	Strenuous Sports & Other Exercises	VAT	rs9604803	22	18398207	C	A	350492	0.671	0.006	0.001	6.46e-05	<0.001	56908	0.672	-0.002	0.002	2.56e-06	0.32
Self Report	Strenuous Sports & Other Exercises	VAT	rs975942	9	25054752	C	G	350492	0.95	0.012	0.003	5.63e-05	<0.001	56908	0.95	-0.005	0.004	4.06e-06	0.21
Self Report	Strenuous Sports & Other Exercises	VAT	rs9881048	3	165506252	A	C	350492	0.192	-0.007	0.001	6.48e-05	<0.001	56908	0.192	0.003	0.002	6.25e-06	0.12
Self Report	Strenuous Sports & Other Exercises	VAT	rs9903845	17	50291181	C	A	350492	0.673	0.006	0.001	6.51e-05	<0.001	56908	0.672	-0.003	0.002	8.55e-06	0.069
Self Report	Strenuous Sports & Other Exercises	VAT	rs9984123	21	45515347	T	G	350492	0.341	-0.006	0.001	5.88e-05	<0.001	56908	0.342	0.004	0.002	1.5e-05	0.016
Accelerometer	Sedentary Behavior	BMI	rs17379561	1	98340139	A	T	91105	0.86	-0.035	0.007	0.000308	<0.001	236013	0.883	-0.009	0.005	1.35e-05	0.0744
Accelerometer	Sedentary Behavior	BMI	rs2038025	1	174543850	G	A	91105	0.609	-0.023	0.005	0.000253	<0.001	339192	0.608	-0.006	0.003	1.12e-05	0.0514
Accelerometer	Sedentary Behavior	BMI	rs4953413	2	46919037	T	C	91105	0.393	0.025	0.005	0.000299	<0.001	236000	0.458	0.001	0.004	1.98e-07	0.8288
Accelerometer	Sedentary Behavior	BMI	rs6678622	1	78092479	C	T	91105	0.595	-0.023	0.005	0.000254	<0.001	339172	0.583	-0.019	0.003	0.000118	<0.001
Accelerometer	Moderate-to-Vigorous PA	BMI	rs10067451	5	87942506	G	A	97737	0.887	0.035	0.007	0.00025	<0.001	144468	0.917	0.007	0.007	6.57e-06	0.33
Accelerometer	Moderate-to-Vigorous PA	BMI	rs1013769	1	174468208	T	C	97737	0.754	0.028	0.005	0.000317	<0.001	144593	0.767	-0.009	0.005	2.53e-05	0.056
Accelerometer	Moderate-to-Vigorous PA	BMI	rs10746688	9	85350368	C	A	97737	0.571	0.021	0.004	0.00024	<0.001	144560	0.6	0.007	0.004	2.09e-05	0.082
Accelerometer	Moderate-to-Vigorous PA	BMI	rs11719262	3	119889300	G	A	97737	0.619	-0.021	0.004	0.000233	<0.001	144568	0.617	0.004	0.004	7.13e-06	0.31
Accelerometer	Moderate-to-Vigorous PA	BMI	rs11810507	1	9063238	G	A	97737	0.847	0.033	0.006	0.000302	<0.001	127778	0.873	-0.001	0.006	1.24e-07	0.9
Accelerometer	Moderate-to-Vigorous PA	BMI	rs1268539	9	128195657	C	A	97737	0.581	-0.021	0.004	0.000238	<0.001	144391	0.617	-0.006	0.004	1.19e-05	0.19
Accelerometer	Moderate-to-Vigorous PA	BMI	rs13150296	4	140933504	G	A	97737	0.617	-0.021	0.004	0.000227	<0.001	144572	0.658	0.01	0.004	4.09e-05	0.015
Accelerometer	Moderate-to-Vigorous PA	BMI	rs13193532	6	28622914	A	G	97737	0.834	-0.031	0.006	0.000278	<0.001	144566	0.833	0.002	0.006	8.89e-07	0.72
Accelerometer	Moderate-to-Vigorous PA	BMI	rs1323320	6	56287985	G	A	97737	0.735	0.024	0.005	0.000248	<0.001	144404	0.85	-0.005	0.005	8.43e-06	0.27
Accelerometer	Moderate-to-Vigorous PA	BMI	rs1383155	8	63733171	G	A	97737	0.785	-0.024	0.005	0.000214	<0.001	144588	0.8	-0.007	0.005	1.43e-05	0.15
Accelerometer	Moderate-to-Vigorous PA	BMI	rs16968653	16	65214467	T	C	97737	0.951	-0.053	0.01	0.000282	<0.001	127212	0.983	-0.009	0.011	5.11e-06	0.42
Accelerometer	Moderate-to-Vigorous PA	BMI	rs17134462	7	44845032	A	G	97737	0.925	-0.042	0.008	0.000261	<0.001	132851	0.95	-0.01	0.009	9.96e-06	0.25
Accelerometer	Moderate-to-Vigorous PA	BMI	rs2052607	18	40788387	G	A	97737	0.655	-0.022	0.005	0.00024	<0.001	144459	0.65	0.012	0.004	4.85e-05	0.0081
Accelerometer	Moderate-to-Vigorous PA	BMI	rs2055014	11	29195732	G	A	97737	0.705	-0.023	0.005	0.000238	<0.001	212133	0.717	-0.003	0.004	3.2e-06	0.41
Accelerometer	Moderate-to-Vigorous PA	BMI	rs2086824	16	89471246	A	C	97737	0.532	0.021	0.004	0.000227	<0.001	144537	0.517	-0.002	0.004	1.26e-06	0.67
Accelerometer	Moderate-to-Vigorous PA	BMI	rs2095618	13	67156486	C	T	97737	0.711	-0.022	0.005	0.000223	<0.001	144515	0.667	0.002	0.005	8.24e-07	0.73
Accelerometer	Moderate-to-Vigorous PA	BMI	rs2271308	17	37817482	T	C	97737	0.269	-0.025	0.005	0.00027	<0.001	212157	0.25	-0.007	0.004	1.52e-05	0.073
Accelerometer	Moderate-to-Vigorous PA	BMI	rs4932178	15	91411656	C	T	97737	0.643	-0.023	0.005	0.000252	<0.001	195136	0.592	0.002	0.004	1.41e-06	0.6
Accelerometer	Moderate-to-Vigorous PA	BMI	rs4958525	5	151669984	G	A	97737	0.823	0.034	0.006	0.000355	<0.001	144496	0.858	0.003	0.006	1.34e-06	0.66
Accelerometer	Moderate-to-Vigorous PA	BMI	rs6976841	7	114781931	A	G	97737	0.985	0.085	0.018	0.000223	<0.001	139618	0.967	-0.025	0.018	1.48e-05	0.15
Accelerometer	Moderate-to-Vigorous PA	BMI	rs7124681	11	47529947	C	A	97737	0.594	0.023	0.004	0.000272	<0.001	212130	0.55	-0.009	0.003	3.53e-05	0.0062
Accelerometer	Moderate-to-Vigorous PA	BMI	rs7204390	16	49620687	A	G	97737	0.496	-0.021	0.004	0.000228	<0.001	144519	0.5	0.001	0.004	5.4e-07	0.78
Accelerometer	Moderate-to-Vigorous PA	BMI	rs7565241	2	116667666	T	G	97737	0.485	-0.02	0.004	0.000221	<0.001	144236	0.45	0.006	0.004	1.37e-05	0.16
Accelerometer	Moderate-to-Vigorous PA	BMI	rs791273	1	147234618	A	G	97737	0.749	-0.027	0.005	0.000304	<0.001	144483	0.692	0.008	0.005	1.67e-05	0.12
Accelerometer	Moderate-to-Vigorous PA	BMI	rs7973521	12	33356589	A	G	97737	0.54	0.021	0.004	0.000233	<0.001	144546	0.592	-0.001	0.004	6.46e-07	0.76
Accelerometer	Moderate-to-Vigorous PA	BMI	rs825682	16	73608290	T	C	97737	0.608	-0.021	0.004	0.00023	<0.001	130047	0.617	-0.001	0.005	1.21e-07	0.9
Accelerometer	Vigorous PA	BMI	rs11161606	1	85853902	T	C	90667	0.576	-0.02	0.004	0.000251	<0.001	236106	0.542	0.004	0.004	6.04e-06	0.2323
Accelerometer	Vigorous PA	BMI	rs11789301	9	31921028	G	A	90667	0.807	-0.024	0.005	0.000233	<0.001	236134	0.183	0.001	0.005	2.32e-07	0.815
Accelerometer	Vigorous PA	BMI	rs11866559	16	71792190	G	A	90667	0.82	-0.027	0.005	0.000271	<0.001	224432	0.858	-0.004	0.005	3.56e-06	0.3715
Accelerometer	Vigorous PA	BMI	rs1668835	18	22478952	T	A	90667	0.688	-0.023	0.004	0.000289	<0.001	236172	0.683	-0.006	0.004	8.42e-06	0.1585
Accelerometer	Vigorous PA	BMI	rs17006599	1	219936765	A	G	90667	0.8	0.027	0.005	0.000313	<0.001	236172	0.767	-0.002	0.004	5.15e-07	0.7272
Accelerometer	Vigorous PA	BMI	rs17221323	10	618685	T	C	90667	0.812	-0.024	0.005	0.00023	<0.001	208319	0.183	0.004	0.005	3.6e-06	0.3868
Accelerometer	Vigorous PA	BMI	rs17395021	8	3427306	T	C	90667	0.871	-0.029	0.006	0.000249	<0.001	228370	0.917	0.008	0.006	7.98e-06	0.177
Accelerometer	Vigorous PA	BMI	rs4419891	9	87609384	T	C	90667	0.278	0.022	0.005	0.000245	<0.001	230308	0.358	-0.003	0.004	1.75e-06	0.526
Accelerometer	Vigorous PA	BMI	rs4627402	17	43932741	C	T	90667	0.78	-0.025	0.005	0.00028	<0.001	181308	0.958	-0.006	0.015	7.83e-07	0.7064
Accelerometer	Vigorous PA	BMI	rs4754194	11	107090187	C	T	90667	0.773	-0.025	0.005	0.000294	<0.001	236026	0.258	0.007	0.004	1.09e-05	0.1086
Accelerometer	Vigorous PA	BMI	rs6579971	5	152207152	A	G	90667	0.292	0.021	0.005	0.000241	<0.001	236165	0.733	0.01	0.004	2.65e-05	0.0124
Accelerometer	Vigorous PA	BMI	rs6711294	2	221157432	G	T	90667	0.626	-0.02	0.004	0.000254	<0.001	236166	0.408	0.002	0.004	1.93e-06	0.4992
Accelerometer	Vigorous PA	BMI	rs723969	7	39059498	A	G	90667	0.767	-0.025	0.005	0.000295	<0.001	236182	0.758	0.006	0.004	1.01e-05	0.1217
Accelerometer	Vigorous PA	BMI	rs9479	15	74328576	A	G	90667	0.51	0.025	0.004	0.000398	<0.001	181241	0.56	-0.003	0.004	2.63e-06	0.4899
Accelerometer	Vigorous PA	BMI	rs9679675	2	175285871	A	C	90667	0.473	-0.021	0.004	0.000287	<0.001	234876	0.517	0.007	0.004	1.43e-05	0.0668
Accelerometer	Overall Activity	BMI	rs11806197	1	77964855	A	G	91105	0.811	0.027	0.006	0.00025	<0.001	339097	0.858	-0.017	0.004	6.42e-05	<0.001
Accelerometer	Overall Activity	BMI	rs12045968	1	33690698	T	G	91105	0.783	-0.028	0.005	0.000309	<0.001	236121	0.817	-0.006	0.004	9.38e-06	0.1367
Accelerometer	Overall Activity	BMI	rs6541235	1	219872389	C	T	91105	0.852	0.03	0.006	0.00025	<0.001	236184	0.858	-0.003	0.005	1.48e-06	0.554
Accelerometer	Overall Activity	BMI	rs791273	1	147234618	A	G	91105	0.748	-0.026	0.005	0.000274	<0.001	235892	0.692	0.012	0.004	3.4e-05	0.0046
Accelerometer	Sedentary Behavior	WHR	rs17379561	1	98340139	A	T	91105	0.86	-0.035	0.007	0.000308	<0.001	144461	0.883	-0.014	0.006	3.81e-05	0.019
Accelerometer	Sedentary Behavior	WHR	rs2038025	1	174543850	G	A	91105	0.609	-0.023	0.005	0.000253	<0.001	212185	0.608	-0.012	0.003	6.02e-05	<0.001
Accelerometer	Sedentary Behavior	WHR	rs4953413	2	46919037	T	C	91105	0.393	0.025	0.005	0.000299	<0.001	144529	0.458	-0.01	0.004	3.87e-05	0.018
Accelerometer	Sedentary Behavior	WHR	rs6678622	1	78092479	C	T	91105	0.595	-0.023	0.005	0.000254	<0.001	212179	0.583	-0.01	0.004	3.88e-05	0.0041
Accelerometer	Moderate-to-Vigorous PA	WHR	rs10067451	5	87942506	G	A	97737	0.887	0.035	0.007	0.00025	<0.001	144468	0.917	0.007	0.007	6.57e-06	0.33
Accelerometer	Moderate-to-Vigorous PA	WHR	rs1013769	1	174468208	T	C	97737	0.754	0.028	0.005	0.000317	<0.001	144593	0.767	-0.009	0.005	2.53e-05	0.056
Accelerometer	Moderate-to-Vigorous PA	WHR	rs10746688	9	85350368	C	A	97737	0.571	0.021	0.004	0.00024	<0.001	144560	0.6	0.007	0.004	2.09e-05	0.082
Accelerometer	Moderate-to-Vigorous PA	WHR	rs11719262	3	119889300	G	A	97737	0.619	-0.021	0.004	0.000233	<0.001	144568	0.617	0.004	0.004	7.13e-06	0.31
Accelerometer	Moderate-to-Vigorous PA	WHR	rs11810507	1	9063238	G	A	97737	0.847	0.033	0.006	0.000302	<0.001	127778	0.873	-0.001	0.006	1.24e-07	0.9
Accelerometer	Moderate-to-Vigorous PA	WHR	rs1268539	9	128195657	C	A	97737	0.581	-0.021	0.004	0.000238	<0.001	144391	0.617	-0.006	0.004	1.19e-05	0.19
Accelerometer	Moderate-to-Vigorous PA	WHR	rs13150296	4	140933504	G	A	97737	0.617	-0.021	0.004	0.000227	<0.001	144572	0.658	0.01	0.004	4.09e-05	0.015
Accelerometer	Moderate-to-Vigorous PA	WHR	rs13193532	6	28622914	A	G	97737	0.834	-0.031	0.006	0.000278	<0.001	144566	0.833	0.002	0.006	8.89e-07	0.72
Accelerometer	Moderate-to-Vigorous PA	WHR	rs1323320	6	56287985	G	A	97737	0.735	0.024	0.005	0.000248	<0.001	144404	0.85	-0.005	0.005	8.43e-06	0.27
Accelerometer	Moderate-to-Vigorous PA	WHR	rs1383155	8	63733171	G	A	97737	0.785	-0.024	0.005	0.000214	<0.001	144588	0.8	-0.007	0.005	1.43e-05	0.15
Accelerometer	Moderate-to-Vigorous PA	WHR	rs16968653	16	65214467	T	C	97737	0.951	-0.053	0.01	0.000282	<0.001	127212	0.983	-0.009	0.011	5.11e-06	0.42
Accelerometer	Moderate-to-Vigorous PA	WHR	rs17134462	7	44845032	A	G	97737	0.925	-0.042	0.008	0.000261	<0.001	132851	0.95	-0.01	0.009	9.96e-06	0.25
Accelerometer	Moderate-to-Vigorous PA	WHR	rs2052607	18	40788387	G	A	97737	0.655	-0.022	0.005	0.00024	<0.001	144459	0.65	0.012	0.004	4.85e-05	0.0081
Accelerometer	Moderate-to-Vigorous PA	WHR	rs2055014	11	29195732	G	A	97737	0.705	-0.023	0.005	0.000238	<0.001	212133	0.717	-0.003	0.004	3.2e-06	0.41
Accelerometer	Moderate-to-Vigorous PA	WHR	rs2086824	16	89471246	A	C	97737	0.532	0.021	0.004	0.000227	<0.001	144537	0.517	-0.002	0.004	1.26e-06	0.67
Accelerometer	Moderate-to-Vigorous PA	WHR	rs2095618	13	67156486	C	T	97737	0.711	-0.022	0.005	0.000223	<0.001	144515	0.667	0.002	0.005	8.24e-07	0.73
Accelerometer	Moderate-to-Vigorous PA	WHR	rs2271308	17	37817482	T	C	97737	0.269	-0.025	0.005	0.00027	<0.001	212157	0.25	-0.007	0.004	1.52e-05	0.073
Accelerometer	Moderate-to-Vigorous PA	WHR	rs4932178	15	91411656	C	T	97737	0.643	-0.023	0.005	0.000252	<0.001	195136	0.592	0.002	0.004	1.41e-06	0.6
Accelerometer	Moderate-to-Vigorous PA	WHR	rs4958525	5	151669984	G	A	97737	0.823	0.034	0.006	0.000355	<0.001	144496	0.858	0.003	0.006	1.34e-06	0.66
Accelerometer	Moderate-to-Vigorous PA	WHR	rs6976841	7	114781931	A	G	97737	0.985	0.085	0.018	0.000223	<0.001	139618	0.967	-0.025	0.018	1.48e-05	0.15
Accelerometer	Moderate-to-Vigorous PA	WHR	rs7124681	11	47529947	C	A	97737	0.594	0.023	0.004	0.000272	<0.001	212130	0.55	-0.009	0.003	3.53e-05	0.0062
Accelerometer	Moderate-to-Vigorous PA	WHR	rs7204390	16	49620687	A	G	97737	0.496	-0.021	0.004	0.000228	<0.001	144519	0.5	0.001	0.004	5.4e-07	0.78
Accelerometer	Moderate-to-Vigorous PA	WHR	rs7565241	2	116667666	T	G	97737	0.485	-0.02	0.004	0.000221	<0.001	144236	0.45	0.006	0.004	1.37e-05	0.16
Accelerometer	Moderate-to-Vigorous PA	WHR	rs791273	1	147234618	A	G	97737	0.749	-0.027	0.005	0.000304	<0.001	144483	0.692	0.008	0.005	1.67e-05	0.12
Accelerometer	Moderate-to-Vigorous PA	WHR	rs7973521	12	33356589	A	G	97737	0.54	0.021	0.004	0.000233	<0.001	144546	0.592	-0.001	0.004	6.46e-07	0.76
Accelerometer	Moderate-to-Vigorous PA	WHR	rs825682	16	73608290	T	C	97737	0.608	-0.021	0.004	0.00023	<0.001	130047	0.617	-0.001	0.005	1.21e-07	0.9
Accelerometer	Vigorous PA	WHR	rs11161606	1	85853902	T	C	90667	0.576	-0.02	0.004	0.000251	<0.001	144574	0.542	0.003	0.004	3.78e-06	0.46
Accelerometer	Vigorous PA	WHR	rs11789301	9	31921028	G	A	90667	0.807	-0.024	0.005	0.000233	<0.001	144580	0.817	0.002	0.005	9.56e-07	0.71
Accelerometer	Vigorous PA	WHR	rs11866559	16	71792190	G	A	90667	0.82	-0.027	0.005	0.000271	<0.001	132852	0.858	-0.006	0.006	1.04e-05	0.24
Accelerometer	Vigorous PA	WHR	rs1668835	18	22478952	T	A	90667	0.688	-0.023	0.004	0.000289	<0.001	144589	0.683	-0.002	0.004	1.51e-06	0.64
Accelerometer	Vigorous PA	WHR	rs17006599	1	219936765	A	G	90667	0.8	0.027	0.005	0.000313	<0.001	144593	0.767	0.001	0.005	2.15e-07	0.86
Accelerometer	Vigorous PA	WHR	rs17221323	10	618685	T	C	90667	0.812	-0.024	0.005	0.00023	<0.001	118823	0.817	0.008	0.006	1.38e-05	0.2
Accelerometer	Vigorous PA	WHR	rs17395021	8	3427306	T	C	90667	0.871	-0.029	0.006	0.000249	<0.001	138712	0.917	0.002	0.007	6.73e-07	0.76
Accelerometer	Vigorous PA	WHR	rs4419891	9	87609384	T	C	90667	0.278	0.022	0.005	0.000245	<0.001	142390	0.358	-0.005	0.005	7.54e-06	0.3
Accelerometer	Vigorous PA	WHR	rs4627402	17	43932741	C	T	90667	0.78	-0.025	0.005	0.00028	<0.001	105495	0.958	-0.008	0.017	1.95e-06	0.65
Accelerometer	Vigorous PA	WHR	rs4754194	11	107090187	C	T	90667	0.773	-0.025	0.005	0.000294	<0.001	144550	0.742	0.011	0.005	3.14e-05	0.033
Accelerometer	Vigorous PA	WHR	rs6579971	5	152207152	A	G	90667	0.292	0.021	0.005	0.000241	<0.001	144583	0.267	0.005	0.005	9.55e-06	0.24
Accelerometer	Vigorous PA	WHR	rs6711294	2	221157432	G	T	90667	0.626	-0.02	0.004	0.000254	<0.001	144586	0.592	-0.004	0.004	5.11e-06	0.39
Accelerometer	Vigorous PA	WHR	rs723969	7	39059498	A	G	90667	0.767	-0.025	0.005	0.000295	<0.001	144596	0.758	0.002	0.005	1.26e-06	0.67
Accelerometer	Vigorous PA	WHR	rs9479	15	74328576	A	G	90667	0.51	0.025	0.004	0.000398	<0.001	104080	0.56	-0.008	0.005	2.09e-05	0.14
Accelerometer	Vigorous PA	WHR	rs9679675	2	175285871	A	C	90667	0.473	-0.021	0.004	0.000287	<0.001	144578	0.517	0.002	0.004	2.23e-06	0.57
Accelerometer	Overall Activity	WHR	rs11806197	1	77964855	A	G	91105	0.811	0.027	0.006	0.00025	<0.001	212141	0.858	-0.008	0.004	1.74e-05	0.055
Accelerometer	Overall Activity	WHR	rs12045968	1	33690698	T	G	91105	0.783	-0.028	0.005	0.000309	<0.001	144563	0.817	0	0.005	9.78e-09	0.97
Accelerometer	Overall Activity	WHR	rs6541235	1	219872389	C	T	91105	0.852	0.03	0.006	0.00025	<0.001	144598	0.858	-0.001	0.006	6.98e-08	0.92
Accelerometer	Overall Activity	WHR	rs791273	1	147234618	A	G	91105	0.748	-0.026	0.005	0.000274	<0.001	144483	0.692	0.008	0.005	1.67e-05	0.12
Accelerometer	Sedentary Behavior	WC	rs17379561	1	98340139	A	T	91105	0.86	-0.035	0.007	0.000308	<0.001	153813	0.883	-0.02	0.006	7.47e-05	<0.001
Accelerometer	Sedentary Behavior	WC	rs2038025	1	174543850	G	A	91105	0.609	-0.023	0.005	0.000253	<0.001	232080	0.608	-0.007	0.004	1.76e-05	0.043
Accelerometer	Sedentary Behavior	WC	rs4953413	2	46919037	T	C	91105	0.393	0.025	0.005	0.000299	<0.001	153884	0.458	-0.005	0.004	9.78e-06	0.22
Accelerometer	Sedentary Behavior	WC	rs6678622	1	78092479	C	T	91105	0.595	-0.023	0.005	0.000254	<0.001	232073	0.583	-0.022	0.004	0.000164	<0.001
Accelerometer	Moderate-to-Vigorous PA	WC	rs10067451	5	87942506	G	A	97737	0.887	0.035	0.007	0.00025	<0.001	153820	0.917	0.013	0.007	2.1e-05	0.072
Accelerometer	Moderate-to-Vigorous PA	WC	rs1013769	1	174468208	T	C	97737	0.754	0.028	0.005	0.000317	<0.001	153945	0.767	-0.009	0.005	2.02e-05	0.078
Accelerometer	Moderate-to-Vigorous PA	WC	rs10746688	9	85350368	C	A	97737	0.571	0.021	0.004	0.00024	<0.001	153912	0.6	0.003	0.004	2.56e-06	0.53
Accelerometer	Moderate-to-Vigorous PA	WC	rs11719262	3	119889300	G	A	97737	0.619	-0.021	0.004	0.000233	<0.001	153920	0.617	0	0.004	4.08e-09	0.98
Accelerometer	Moderate-to-Vigorous PA	WC	rs11810507	1	9063238	G	A	97737	0.847	0.033	0.006	0.000302	<0.001	137226	0.873	0	0.007	1.83e-08	0.96
Accelerometer	Moderate-to-Vigorous PA	WC	rs1268539	9	128195657	C	A	97737	0.581	-0.021	0.004	0.000238	<0.001	153743	0.617	0.001	0.004	2.02e-07	0.86
Accelerometer	Moderate-to-Vigorous PA	WC	rs13150296	4	140933504	G	A	97737	0.617	-0.021	0.004	0.000227	<0.001	153924	0.658	0.009	0.004	2.54e-05	0.048
Accelerometer	Moderate-to-Vigorous PA	WC	rs13193532	6	28622914	A	G	97737	0.834	-0.031	0.006	0.000278	<0.001	153918	0.833	0.006	0.006	5.22e-06	0.37
Accelerometer	Moderate-to-Vigorous PA	WC	rs1323320	6	56287985	G	A	97737	0.735	0.024	0.005	0.000248	<0.001	153756	0.85	-0.002	0.005	1.6e-06	0.62
Accelerometer	Moderate-to-Vigorous PA	WC	rs1383155	8	63733171	G	A	97737	0.785	-0.024	0.005	0.000214	<0.001	153940	0.8	-0.002	0.005	1.18e-06	0.67
Accelerometer	Moderate-to-Vigorous PA	WC	rs16968653	16	65214467	T	C	97737	0.951	-0.053	0.01	0.000282	<0.001	133345	0.983	0.012	0.011	8.4e-06	0.29
Accelerometer	Moderate-to-Vigorous PA	WC	rs17134462	7	44845032	A	G	97737	0.925	-0.042	0.008	0.000261	<0.001	142203	0.95	-0.01	0.009	9.31e-06	0.25
Accelerometer	Moderate-to-Vigorous PA	WC	rs2052607	18	40788387	G	A	97737	0.655	-0.022	0.005	0.00024	<0.001	153665	0.65	0.013	0.004	5.58e-05	0.0034
Accelerometer	Moderate-to-Vigorous PA	WC	rs2055014	11	29195732	G	A	97737	0.705	-0.023	0.005	0.000238	<0.001	232034	0.717	0	0.004	6.81e-08	0.9
Accelerometer	Moderate-to-Vigorous PA	WC	rs2086824	16	89471246	A	C	97737	0.532	0.021	0.004	0.000227	<0.001	153889	0.517	-0.003	0.004	3.55e-06	0.46
Accelerometer	Moderate-to-Vigorous PA	WC	rs2095618	13	67156486	C	T	97737	0.711	-0.022	0.005	0.000223	<0.001	153867	0.667	0.003	0.005	3.39e-06	0.47
Accelerometer	Moderate-to-Vigorous PA	WC	rs2271308	17	37817482	T	C	97737	0.269	-0.025	0.005	0.00027	<0.001	232049	0.25	-0.006	0.004	1.3e-05	0.083
Accelerometer	Moderate-to-Vigorous PA	WC	rs4932178	15	91411656	C	T	97737	0.643	-0.023	0.005	0.000252	<0.001	214114	0.592	0.004	0.004	6.18e-06	0.25
Accelerometer	Moderate-to-Vigorous PA	WC	rs4958525	5	151669984	G	A	97737	0.823	0.034	0.006	0.000355	<0.001	153848	0.858	0.01	0.006	1.79e-05	0.097
Accelerometer	Moderate-to-Vigorous PA	WC	rs6976841	7	114781931	A	G	97737	0.985	0.085	0.018	0.000223	<0.001	148969	0.967	-0.02	0.018	8.52e-06	0.26
Accelerometer	Moderate-to-Vigorous PA	WC	rs7124681	11	47529947	C	A	97737	0.594	0.023	0.004	0.000272	<0.001	232025	0.55	-0.02	0.003	0.000146	<0.001
Accelerometer	Moderate-to-Vigorous PA	WC	rs7204390	16	49620687	A	G	97737	0.496	-0.021	0.004	0.000228	<0.001	153871	0.5	-0.003	0.004	3.88e-06	0.44
Accelerometer	Moderate-to-Vigorous PA	WC	rs7565241	2	116667666	T	G	97737	0.485	-0.02	0.004	0.000221	<0.001	153588	0.45	0.006	0.004	1.12e-05	0.19
Accelerometer	Moderate-to-Vigorous PA	WC	rs791273	1	147234618	A	G	97737	0.749	-0.027	0.005	0.000304	<0.001	153835	0.692	0.013	0.005	4.74e-05	0.0069
Accelerometer	Moderate-to-Vigorous PA	WC	rs7973521	12	33356589	A	G	97737	0.54	0.021	0.004	0.000233	<0.001	150682	0.592	0	0.004	1.67e-08	0.96
Accelerometer	Moderate-to-Vigorous PA	WC	rs825682	16	73608290	T	C	97737	0.608	-0.021	0.004	0.00023	<0.001	139398	0.617	-0.001	0.005	4.15e-07	0.81
Accelerometer	Vigorous PA	WC	rs11161606	1	85853902	T	C	90667	0.576	-0.02	0.004	0.000251	<0.001	153926	0.542	0.008	0.004	2.13e-05	0.07
Accelerometer	Vigorous PA	WC	rs11789301	9	31921028	G	A	90667	0.807	-0.024	0.005	0.000233	<0.001	153932	0.817	0.002	0.006	4.61e-07	0.79
Accelerometer	Vigorous PA	WC	rs11866559	16	71792190	G	A	90667	0.82	-0.027	0.005	0.000271	<0.001	142203	0.858	-0.006	0.006	8.21e-06	0.28
Accelerometer	Vigorous PA	WC	rs1668835	18	22478952	T	A	90667	0.688	-0.023	0.004	0.000289	<0.001	153941	0.683	-0.002	0.005	1.89e-06	0.59
Accelerometer	Vigorous PA	WC	rs17006599	1	219936765	A	G	90667	0.8	0.027	0.005	0.000313	<0.001	153945	0.767	0	0.005	6.55e-08	0.92
Accelerometer	Vigorous PA	WC	rs17221323	10	618685	T	C	90667	0.812	-0.024	0.005	0.00023	<0.001	128142	0.817	0.004	0.006	2.79e-06	0.55
Accelerometer	Vigorous PA	WC	rs17395021	8	3427306	T	C	90667	0.871	-0.029	0.006	0.000249	<0.001	148062	0.917	0.011	0.007	1.73e-05	0.11
Accelerometer	Vigorous PA	WC	rs4419891	9	87609384	T	C	90667	0.278	0.022	0.005	0.000245	<0.001	151742	0.358	-0.005	0.005	6.52e-06	0.32
Accelerometer	Vigorous PA	WC	rs4627402	17	43932741	C	T	90667	0.78	-0.025	0.005	0.00028	<0.001	114100	0.958	-0.004	0.017	5.07e-07	0.81
Accelerometer	Vigorous PA	WC	rs4754194	11	107090187	C	T	90667	0.773	-0.025	0.005	0.000294	<0.001	153909	0.742	0.011	0.005	3.06e-05	0.03
Accelerometer	Vigorous PA	WC	rs6579971	5	152207152	A	G	90667	0.292	0.021	0.005	0.000241	<0.001	153935	0.267	0.009	0.005	2.37e-05	0.056
Accelerometer	Vigorous PA	WC	rs6711294	2	221157432	G	T	90667	0.626	-0.02	0.004	0.000254	<0.001	153938	0.592	0.001	0.004	3.36e-07	0.82
Accelerometer	Vigorous PA	WC	rs723969	7	39059498	A	G	90667	0.767	-0.025	0.005	0.000295	<0.001	153948	0.758	0.007	0.005	1.12e-05	0.19
Accelerometer	Vigorous PA	WC	rs9479	15	74328576	A	G	90667	0.51	0.025	0.004	0.000398	<0.001	112511	0.56	0.001	0.005	4.6e-07	0.82
Accelerometer	Vigorous PA	WC	rs9679675	2	175285871	A	C	90667	0.473	-0.021	0.004	0.000287	<0.001	153930	0.517	0.006	0.004	1.12e-05	0.19
Accelerometer	Overall Activity	WC	rs11806197	1	77964855	A	G	91105	0.811	0.027	0.006	0.00025	<0.001	232034	0.858	-0.02	0.004	9.7e-05	<0.001
Accelerometer	Overall Activity	WC	rs12045968	1	33690698	T	G	91105	0.783	-0.028	0.005	0.000309	<0.001	153916	0.817	0	0.005	3.68e-08	0.94
Accelerometer	Overall Activity	WC	rs6541235	1	219872389	C	T	91105	0.852	0.03	0.006	0.00025	<0.001	153950	0.858	0	0.006	5.01e-08	0.93
Accelerometer	Overall Activity	WC	rs791273	1	147234618	A	G	91105	0.748	-0.026	0.005	0.000274	<0.001	153835	0.692	0.013	0.005	4.74e-05	0.0069
Accelerometer	Sedentary Behavior	%TBF	rs17379561	1	98340139	A	T	91105	0.86	-0.035	0.007	0.000308	<0.001	71684.9	0.845	0.01	0.008	2.29e-05	0.1998
Accelerometer	Sedentary Behavior	%TBF	rs2038025	1	174543850	G	A	91105	0.609	-0.023	0.005	0.000253	<0.001	100692	0.612	-0.015	0.005	0.000108	<0.001
Accelerometer	Sedentary Behavior	%TBF	rs4953413	2	46919037	T	C	91105	0.393	0.025	0.005	0.000299	<0.001	74334.7	0.583	-0.003	0.006	3.86e-06	0.5922
Accelerometer	Moderate-to-Vigorous PA	%TBF	rs10067451	5	87942506	G	A	97737	0.887	0.035	0.007	0.00025	<0.001	69388.4	0.875	0.013	0.009	2.94e-05	0.1531
Accelerometer	Moderate-to-Vigorous PA	%TBF	rs10746688	9	85350368	C	A	97737	0.571	0.021	0.004	0.00024	<0.001	76102.5	0.581	-0.003	0.005	4.61e-06	0.5535
Accelerometer	Moderate-to-Vigorous PA	%TBF	rs11719262	3	119889300	G	A	97737	0.619	-0.021	0.004	0.000233	<0.001	76126.2	0.626	0.008	0.006	2.92e-05	0.136
Accelerometer	Moderate-to-Vigorous PA	%TBF	rs11810507	1	9063238	G	A	97737	0.847	0.033	0.006	0.000302	<0.001	59744.8	0.833	-0.002	0.008	1.48e-06	0.766
Accelerometer	Moderate-to-Vigorous PA	%TBF	rs1268539	9	128195657	C	A	97737	0.581	-0.021	0.004	0.000238	<0.001	73856.9	0.584	0.011	0.006	5.51e-05	0.0436
Accelerometer	Moderate-to-Vigorous PA	%TBF	rs13150296	4	140933504	G	A	97737	0.617	-0.021	0.004	0.000227	<0.001	73498.7	0.633	0.002	0.006	2.41e-06	0.6737
Accelerometer	Moderate-to-Vigorous PA	%TBF	rs13193532	6	28622914	A	G	97737	0.834	-0.031	0.006	0.000278	<0.001	64440.2	0.143	0.01	0.008	2.37e-05	0.2167
Accelerometer	Moderate-to-Vigorous PA	%TBF	rs1323320	6	56287985	G	A	97737	0.735	0.024	0.005	0.000248	<0.001	75171.5	0.712	0.006	0.006	1.51e-05	0.2866
Accelerometer	Moderate-to-Vigorous PA	%TBF	rs1383155	8	63733171	G	A	97737	0.785	-0.024	0.005	0.000214	<0.001	76132	0.761	-0.008	0.006	2.12e-05	0.2041
Accelerometer	Moderate-to-Vigorous PA	%TBF	rs16968653	16	65214467	T	C	97737	0.951	-0.053	0.01	0.000282	<0.001	66241.9	0.062	0.006	0.013	3.22e-06	0.644
Accelerometer	Moderate-to-Vigorous PA	%TBF	rs17134462	7	44845032	A	G	97737	0.925	-0.042	0.008	0.000261	<0.001	70506.4	0.069	-0.007	0.011	4.92e-06	0.5557
Accelerometer	Moderate-to-Vigorous PA	%TBF	rs2052607	18	40788387	G	A	97737	0.655	-0.022	0.005	0.00024	<0.001	75596.3	0.647	0.01	0.006	4.13e-05	0.0771
Accelerometer	Moderate-to-Vigorous PA	%TBF	rs2055014	11	29195732	G	A	97737	0.705	-0.023	0.005	0.000238	<0.001	100621	0.683	0.007	0.005	2.25e-05	0.1324
Accelerometer	Moderate-to-Vigorous PA	%TBF	rs2095618	13	67156486	C	T	97737	0.711	-0.022	0.005	0.000223	<0.001	76087	0.694	0.006	0.006	1.18e-05	0.343
Accelerometer	Moderate-to-Vigorous PA	%TBF	rs2271308	17	37817482	T	C	97737	0.269	-0.025	0.005	0.00027	<0.001	98846.5	0.715	0.004	0.005	5.71e-06	0.4524
Accelerometer	Moderate-to-Vigorous PA	%TBF	rs4932178	15	91411656	C	T	97737	0.643	-0.023	0.005	0.000252	<0.001	86246.5	0.652	-0.005	0.005	1.26e-05	0.2975
Accelerometer	Moderate-to-Vigorous PA	%TBF	rs4958525	5	151669984	G	A	97737	0.823	0.034	0.006	0.000355	<0.001	73418.9	0.833	0	0.008	5.91e-08	0.9475
Accelerometer	Moderate-to-Vigorous PA	%TBF	rs6976841	7	114781931	A	G	97737	0.985	0.085	0.018	0.000223	<0.001	63203.9	0.022	-0.022	0.024	1.4e-05	0.3467
Accelerometer	Moderate-to-Vigorous PA	%TBF	rs7124681	11	47529947	C	A	97737	0.594	0.023	0.004	0.000272	<0.001	100642	0.604	-0.02	0.005	0.000176	<0.001
Accelerometer	Moderate-to-Vigorous PA	%TBF	rs7204390	16	49620687	A	G	97737	0.496	-0.021	0.004	0.000228	<0.001	76047.4	0.527	0.003	0.005	3.17e-06	0.6237
Accelerometer	Moderate-to-Vigorous PA	%TBF	rs7565241	2	116667666	T	G	97737	0.485	-0.02	0.004	0.000221	<0.001	76099.9	0.534	0.009	0.006	3.84e-05	0.0874
Accelerometer	Moderate-to-Vigorous PA	%TBF	rs791273	1	147234618	A	G	97737	0.749	-0.027	0.005	0.000304	<0.001	76093.2	0.264	0.007	0.006	1.93e-05	0.2251
Accelerometer	Moderate-to-Vigorous PA	%TBF	rs7973521	12	33356589	A	G	97737	0.54	0.021	0.004	0.000233	<0.001	71966.2	0.445	-0.004	0.006	6.74e-06	0.4862
Accelerometer	Moderate-to-Vigorous PA	%TBF	rs825682	16	73608290	T	C	97737	0.608	-0.021	0.004	0.00023	<0.001	55721.2	0.4	0.003	0.007	4.22e-06	0.6278
Accelerometer	Vigorous PA	%TBF	rs11161606	1	85853902	T	C	90667	0.576	-0.02	0.004	0.000251	<0.001	76080	0.426	0.001	0.005	3.65e-07	0.8676
Accelerometer	Vigorous PA	%TBF	rs11789301	9	31921028	G	A	90667	0.807	-0.024	0.005	0.000233	<0.001	76126.3	0.819	0.005	0.007	6.18e-06	0.4929
Accelerometer	Vigorous PA	%TBF	rs11866559	16	71792190	G	A	90667	0.82	-0.027	0.005	0.000271	<0.001	72624.5	0.756	0.004	0.007	5.58e-06	0.5245
Accelerometer	Vigorous PA	%TBF	rs1668835	18	22478952	T	A	90667	0.688	-0.023	0.004	0.000289	<0.001	73776.9	0.689	0.011	0.006	4.88e-05	0.0577
Accelerometer	Vigorous PA	%TBF	rs17006599	1	219936765	A	G	90667	0.8	0.027	0.005	0.000313	<0.001	76098.9	0.229	-0.012	0.006	4.77e-05	0.0568
Accelerometer	Vigorous PA	%TBF	rs17221323	10	618685	T	C	90667	0.812	-0.024	0.005	0.00023	<0.001	60594.2	0.183	-0.002	0.008	9.31e-07	0.8123
Accelerometer	Vigorous PA	%TBF	rs17395021	8	3427306	T	C	90667	0.871	-0.029	0.006	0.000249	<0.001	62673.7	0.137	0.016	0.009	5.02e-05	0.076
Accelerometer	Vigorous PA	%TBF	rs4419891	9	87609384	T	C	90667	0.278	0.022	0.005	0.000245	<0.001	60506.8	0.703	0.004	0.006	4.79e-06	0.5903
Accelerometer	Vigorous PA	%TBF	rs4627402	17	43932741	C	T	90667	0.78	-0.025	0.005	0.00028	<0.001	52080.8	0.945	0.052	0.024	8.75e-05	0.0327
Accelerometer	Vigorous PA	%TBF	rs4754194	11	107090187	C	T	90667	0.773	-0.025	0.005	0.000294	<0.001	74687.8	0.763	0.01	0.006	3.08e-05	0.1296
Accelerometer	Vigorous PA	%TBF	rs6579971	5	152207152	A	G	90667	0.292	0.021	0.005	0.000241	<0.001	76094.2	0.704	0.011	0.006	4.74e-05	0.0577
Accelerometer	Vigorous PA	%TBF	rs6711294	2	221157432	G	T	90667	0.626	-0.02	0.004	0.000254	<0.001	76102.6	0.595	0.003	0.006	3.65e-06	0.598
Accelerometer	Vigorous PA	%TBF	rs723969	7	39059498	A	G	90667	0.767	-0.025	0.005	0.000295	<0.001	73491.2	0.235	0.007	0.006	1.72e-05	0.2614
Accelerometer	Vigorous PA	%TBF	rs9479	15	74328576	A	G	90667	0.51	0.025	0.004	0.000398	<0.001	55213	0.504	-0.005	0.006	1.1e-05	0.4367
Accelerometer	Vigorous PA	%TBF	rs9679675	2	175285871	A	C	90667	0.473	-0.021	0.004	0.000287	<0.001	74715.7	0.507	0.011	0.006	5.55e-05	0.0417
Accelerometer	Overall Activity	%TBF	rs11806197	1	77964855	A	G	91105	0.811	0.027	0.006	0.00025	<0.001	100676	0.195	-0.015	0.006	6.78e-05	0.009
Accelerometer	Overall Activity	%TBF	rs12045968	1	33690698	T	G	91105	0.783	-0.028	0.005	0.000309	<0.001	74334.3	0.232	0.002	0.006	1.45e-06	0.7428
Accelerometer	Overall Activity	%TBF	rs6541235	1	219872389	C	T	91105	0.852	0.03	0.006	0.00025	<0.001	65767.1	0.839	-0.008	0.008	1.76e-05	0.2815
Accelerometer	Overall Activity	%TBF	rs791273	1	147234618	A	G	91105	0.748	-0.026	0.005	0.000274	<0.001	76093.2	0.264	0.007	0.006	1.93e-05	0.2251
Accelerometer	Sedentary Behavior	VAT	rs10916119	1	227485655	G	A	91105	0.824	0.034	0.007	0.000287	<0.001	323796	0.824	-0.001	0.005	1.96e-07	0.89
Accelerometer	Sedentary Behavior	VAT	rs12741347	1	78152792	C	G	91105	0.595	-0.023	0.005	0.000261	<0.001	323796	0.595	-0.011	0.003	0.00012	<0.001
Accelerometer	Sedentary Behavior	VAT	rs17379561	1	98340139	A	T	91105	0.86	-0.035	0.007	0.000308	<0.001	323796	0.86	-0.011	0.005	5.94e-05	0.016
Accelerometer	Sedentary Behavior	VAT	rs4953413	2	46919037	T	C	91105	0.393	0.025	0.005	0.000299	<0.001	323796	0.394	0.002	0.003	4.23e-06	0.52
Accelerometer	Sedentary Behavior	VAT	rs61776614	1	2166406	C	T	91105	0.925	0.05	0.009	0.000331	<0.001	323796	0.924	0.003	0.006	2.81e-06	0.6
Accelerometer	Sedentary Behavior	VAT	rs61826916	1	174585186	T	C	91105	0.609	-0.023	0.005	0.000254	<0.001	323796	0.609	0.001	0.003	3.18e-07	0.86
Accelerometer	Moderate-to-Vigorous PA	VAT	rs10746688	9	85350368	C	A	97737	0.571	0.021	0.004	0.00024	<0.001	323796	0.571	0.002	0.003	4.23e-06	0.52
Accelerometer	Moderate-to-Vigorous PA	VAT	rs112332086	2	67453726	T	A	97737	0.948	0.05	0.01	0.00026	<0.001	323796	0.948	0.002	0.007	7.26e-07	0.79
Accelerometer	Moderate-to-Vigorous PA	VAT	rs113616507	16	29845269	C	A	97737	0.992	0.114	0.025	0.000215	<0.001	323796	0.992	-0.005	0.019	7.26e-07	0.79
Accelerometer	Moderate-to-Vigorous PA	VAT	rs113968953	1	219820583	C	T	97737	0.859	0.029	0.006	0.000214	<0.001	323796	0.859	-0.012	0.005	6.18e-05	0.014
Accelerometer	Moderate-to-Vigorous PA	VAT	rs11719262	3	119889300	G	A	97737	0.619	-0.021	0.004	0.000233	<0.001	323796	0.619	0.002	0.003	3.48e-06	0.56
Accelerometer	Moderate-to-Vigorous PA	VAT	rs11810507	1	9063238	G	A	97737	0.847	0.033	0.006	0.000302	<0.001	323796	0.847	0	0.005	5.8e-08	0.94
Accelerometer	Moderate-to-Vigorous PA	VAT	rs11852679	15	92165068	T	C	97737	0.678	0.024	0.005	0.000232	<0.001	323796	0.678	0.001	0.004	4.72e-07	0.83
Accelerometer	Moderate-to-Vigorous PA	VAT	rs12149336	16	89423041	T	G	97737	0.487	0.022	0.004	0.000253	<0.001	323796	0.487	-0.002	0.003	5.84e-06	0.45
Accelerometer	Moderate-to-Vigorous PA	VAT	rs1268539	9	128195657	C	A	97737	0.581	-0.021	0.004	0.000238	<0.001	323796	0.581	-0.002	0.003	2.11e-06	0.65
Accelerometer	Moderate-to-Vigorous PA	VAT	rs12798028	11	47604639	C	T	97737	0.594	0.023	0.004	0.000273	<0.001	323796	0.594	-0.014	0.003	0.000196	<0.001
Accelerometer	Moderate-to-Vigorous PA	VAT	rs13171519	5	137859914	C	T	97737	0.723	0.023	0.005	0.000227	<0.001	323796	0.723	-0.003	0.004	5.59e-06	0.46
Accelerometer	Moderate-to-Vigorous PA	VAT	rs1323320	6	56287985	G	A	97737	0.735	0.024	0.005	0.000248	<0.001	323796	0.735	-0.007	0.004	3.31e-05	0.072
Accelerometer	Moderate-to-Vigorous PA	VAT	rs139933525	10	95773554	C	A	97737	0.99	0.105	0.022	0.000225	<0.001	323796	0.99	0.006	0.017	1.31e-06	0.72
Accelerometer	Moderate-to-Vigorous PA	VAT	rs1424751	11	57479732	G	C	97737	0.567	0.022	0.005	0.00023	<0.001	323796	0.567	-0.003	0.003	6.37e-06	0.43
Accelerometer	Moderate-to-Vigorous PA	VAT	rs142641476	11	88674436	G	A	97737	0.98	0.081	0.018	0.000214	<0.001	323796	0.98	-0.043	0.013	0.000111	0.001
Accelerometer	Moderate-to-Vigorous PA	VAT	rs143092829	7	44859996	G	A	97737	0.925	-0.042	0.008	0.00027	<0.001	323796	0.925	0	0.006	0	1
Accelerometer	Moderate-to-Vigorous PA	VAT	rs148193266	11	104528681	A	C	97737	0.957	-0.055	0.011	0.000257	<0.001	323796	0.957	0	0.008	0	1
Accelerometer	Moderate-to-Vigorous PA	VAT	rs16968653	16	65214467	T	C	97737	0.951	-0.053	0.01	0.000282	<0.001	323796	0.951	0.005	0.008	4.23e-06	0.52
Accelerometer	Moderate-to-Vigorous PA	VAT	rs17135735	5	112917803	C	T	97737	0.929	0.039	0.008	0.000217	<0.001	323796	0.929	-0.009	0.006	2.02e-05	0.16
Accelerometer	Moderate-to-Vigorous PA	VAT	rs17443704	5	151668231	G	A	97737	0.823	0.034	0.006	0.000355	<0.001	323796	0.823	0.005	0.004	1.15e-05	0.29
Accelerometer	Moderate-to-Vigorous PA	VAT	rs186056728	18	221643	C	G	97737	0.968	-0.059	0.013	0.000218	<0.001	323796	0.968	0	0.01	1.45e-08	0.97
Accelerometer	Moderate-to-Vigorous PA	VAT	rs201118475	4	49107061	A	C	97737	0.248	-0.025	0.005	0.000229	<0.001	323796	0.248	0.008	0.004	4.7e-05	0.032
Accelerometer	Moderate-to-Vigorous PA	VAT	rs2055014	11	29195732	G	A	97737	0.705	-0.023	0.005	0.000238	<0.001	323796	0.705	0.002	0.004	4.88e-06	0.49
Accelerometer	Moderate-to-Vigorous PA	VAT	rs2095618	13	67156486	C	T	97737	0.711	-0.022	0.005	0.000223	<0.001	323796	0.711	0.01	0.004	7.92e-05	0.0054
Accelerometer	Moderate-to-Vigorous PA	VAT	rs2271308	17	37817482	T	C	97737	0.269	-0.025	0.005	0.00027	<0.001	323796	0.269	0.001	0.004	5.3e-07	0.82
Accelerometer	Moderate-to-Vigorous PA	VAT	rs34953859	6	28657458	A	G	97737	0.834	-0.031	0.006	0.00028	<0.001	323796	0.834	-0.005	0.004	1.35e-05	0.25
Accelerometer	Moderate-to-Vigorous PA	VAT	rs36039102	7	114779628	G	A	97737	0.985	0.085	0.018	0.000225	<0.001	323796	0.985	-0.033	0.014	6.18e-05	0.014
Accelerometer	Moderate-to-Vigorous PA	VAT	rs362312	4	3237644	T	C	97737	0.574	-0.021	0.004	0.000243	<0.001	323796	0.574	0.006	0.003	2.89e-05	0.093
Accelerometer	Moderate-to-Vigorous PA	VAT	rs4480415	1	174800121	G	A	97737	0.725	0.029	0.005	0.000339	<0.001	323796	0.725	0.001	0.004	8.75e-07	0.77
Accelerometer	Moderate-to-Vigorous PA	VAT	rs4932372	15	91407275	A	C	97737	0.664	-0.023	0.005	0.000255	<0.001	323796	0.664	0.01	0.003	8.1e-05	0.0049
Accelerometer	Moderate-to-Vigorous PA	VAT	rs58097553	8	63731694	A	T	97737	0.785	-0.025	0.005	0.000226	<0.001	323796	0.785	0.003	0.004	4.65e-06	0.5
Accelerometer	Moderate-to-Vigorous PA	VAT	rs58564605	1	150998916	G	A	97737	0.65	0.023	0.005	0.000249	<0.001	323796	0.65	-0.009	0.003	6.31e-05	0.013
Accelerometer	Moderate-to-Vigorous PA	VAT	rs58651699	22	23916271	C	T	97737	0.516	-0.022	0.005	0.000223	<0.001	323796	0.516	0.005	0.004	1.93e-05	0.17
Accelerometer	Moderate-to-Vigorous PA	VAT	rs6846081	4	140928557	C	A	97737	0.618	-0.021	0.004	0.000228	<0.001	323796	0.618	0.007	0.003	4.94e-05	0.028
Accelerometer	Moderate-to-Vigorous PA	VAT	rs72902426	18	40876998	G	T	97737	0.988	0.102	0.02	0.000267	<0.001	323796	0.988	-0.01	0.015	4.23e-06	0.52
Accelerometer	Moderate-to-Vigorous PA	VAT	rs73148377	12	80528465	T	C	97737	0.99	-0.109	0.023	0.000234	<0.001	323796	0.99	0.017	0.017	1.1e-05	0.3
Accelerometer	Moderate-to-Vigorous PA	VAT	rs74324714	8	64920807	A	C	97737	0.982	-0.081	0.017	0.00024	<0.001	323796	0.982	0.006	0.012	2.66e-06	0.61
Accelerometer	Moderate-to-Vigorous PA	VAT	rs7565241	2	116667666	T	G	97737	0.485	-0.02	0.004	0.000221	<0.001	323796	0.485	-0.001	0.003	1.86e-06	0.67
Accelerometer	Moderate-to-Vigorous PA	VAT	rs78434597	11	31121145	G	A	97737	0.947	0.046	0.01	0.000227	<0.001	323796	0.947	-0.015	0.007	4.5e-05	0.036
Accelerometer	Moderate-to-Vigorous PA	VAT	rs78613547	18	44317306	G	A	97737	0.939	-0.042	0.009	0.000214	<0.001	323796	0.939	0.016	0.007	5.45e-05	0.021
Accelerometer	Moderate-to-Vigorous PA	VAT	rs7898420	10	105054192	T	C	97737	0.611	-0.022	0.005	0.00023	<0.001	323796	0.611	0.001	0.003	1.04e-06	0.75
Accelerometer	Moderate-to-Vigorous PA	VAT	rs791273	1	147234618	A	G	97737	0.749	-0.027	0.005	0.000304	<0.001	323796	0.749	0.005	0.004	2.02e-05	0.16
Accelerometer	Moderate-to-Vigorous PA	VAT	rs79302728	15	64954664	A	G	97737	0.948	-0.049	0.01	0.000245	<0.001	323796	0.948	0.005	0.007	5.1e-06	0.48
Accelerometer	Moderate-to-Vigorous PA	VAT	rs7973521	12	33356589	A	G	97737	0.54	0.021	0.004	0.000233	<0.001	323796	0.54	-0.002	0.003	2.37e-06	0.63
Accelerometer	Moderate-to-Vigorous PA	VAT	rs825682	16	73608290	T	C	97737	0.608	-0.021	0.004	0.00023	<0.001	323796	0.608	0.005	0.003	2.77e-05	0.1
Accelerometer	Moderate-to-Vigorous PA	VAT	rs9293503	5	87948962	T	C	97737	0.888	0.035	0.007	0.000253	<0.001	323796	0.888	0.001	0.005	1.31e-07	0.91
Accelerometer	Moderate-to-Vigorous PA	VAT	rs9938281	16	49625336	A	G	97737	0.474	-0.022	0.004	0.000249	<0.001	323796	0.474	0.001	0.003	3.66e-07	0.85
Accelerometer	Vigorous PA	VAT	rs10465810	1	65673646	A	T	90667	0.607	0.02	0.004	0.000242	<0.001	323796	0.607	-0.003	0.003	1.05e-05	0.31
Accelerometer	Vigorous PA	VAT	rs11866559	16	71792190	G	A	90667	0.82	-0.027	0.005	0.000271	<0.001	323796	0.82	0.002	0.004	2.24e-06	0.64
Accelerometer	Vigorous PA	VAT	rs1358994	13	38084278	G	C	90667	0.663	-0.022	0.005	0.000241	<0.001	323796	0.662	-0.002	0.004	4.44e-06	0.51
Accelerometer	Vigorous PA	VAT	rs1454556	2	221156441	T	C	90667	0.626	-0.02	0.004	0.000254	<0.001	323796	0.626	0.004	0.003	1.3e-05	0.26
Accelerometer	Vigorous PA	VAT	rs1668835	18	22478952	T	A	90667	0.688	-0.023	0.004	0.000289	<0.001	323796	0.688	0.006	0.004	3.04e-05	0.085
Accelerometer	Vigorous PA	VAT	rs17221323	10	618685	T	C	90667	0.812	-0.024	0.005	0.00023	<0.001	323796	0.813	0.007	0.004	2.61e-05	0.11
Accelerometer	Vigorous PA	VAT	rs17395021	8	3427306	T	C	90667	0.871	-0.029	0.006	0.000249	<0.001	323796	0.87	0.008	0.005	2.77e-05	0.1
Accelerometer	Vigorous PA	VAT	rs1856329	1	219939623	A	C	90667	0.801	0.027	0.005	0.000315	<0.001	323796	0.801	-0.006	0.004	2.35e-05	0.13
Accelerometer	Vigorous PA	VAT	rs2867655	20	41818289	C	G	90667	0.161	0.027	0.006	0.000255	<0.001	323796	0.162	0	0.004	2.57e-08	0.96
Accelerometer	Vigorous PA	VAT	rs4419891	9	87609384	T	C	90667	0.278	0.022	0.005	0.000245	<0.001	323796	0.278	0.003	0.004	6.37e-06	0.43
Accelerometer	Vigorous PA	VAT	rs4754194	11	107090187	C	T	90667	0.773	-0.025	0.005	0.000294	<0.001	323796	0.773	0.008	0.004	4.04e-05	0.047
Accelerometer	Vigorous PA	VAT	rs61276363	9	31876806	G	T	90667	0.808	-0.025	0.005	0.000241	<0.001	323796	0.808	0.005	0.004	1.35e-05	0.25
Accelerometer	Vigorous PA	VAT	rs62125156	19	7943575	A	C	90667	0.788	0.024	0.005	0.00025	<0.001	323796	0.788	-0.012	0.004	9.77e-05	0.002
Accelerometer	Vigorous PA	VAT	rs62443625	7	39053131	T	C	90667	0.767	-0.026	0.005	0.000306	<0.001	323796	0.767	0.009	0.004	5.83e-05	0.017
Accelerometer	Vigorous PA	VAT	rs62460842	7	78746027	G	A	90667	0.92	0.035	0.008	0.000235	<0.001	323796	0.92	-0.008	0.006	1.76e-05	0.19
Accelerometer	Vigorous PA	VAT	rs6433478	2	175241482	T	C	90667	0.457	-0.024	0.004	0.000358	<0.001	323796	0.457	0.005	0.003	2.61e-05	0.11
Accelerometer	Vigorous PA	VAT	rs6579971	5	152207152	A	G	90667	0.292	0.021	0.005	0.000241	<0.001	323796	0.292	0	0.004	1.31e-07	0.91
Accelerometer	Vigorous PA	VAT	rs6754234	2	24543902	C	T	90667	0.097	0.032	0.007	0.000238	<0.001	323796	0.097	-0.01	0.005	3.62e-05	0.06
Accelerometer	Vigorous PA	VAT	rs72633364	8	34186888	G	A	90667	0.711	-0.023	0.005	0.000283	<0.001	323796	0.712	-0.003	0.004	6.65e-06	0.42
Accelerometer	Vigorous PA	VAT	rs743580	15	74328116	A	G	90667	0.51	0.025	0.004	0.000406	<0.001	323796	0.511	-0.005	0.003	2.12e-05	0.15
Accelerometer	Vigorous PA	VAT	rs74863845	5	7147443	C	G	90667	0.977	-0.066	0.014	0.000244	<0.001	323796	0.977	0.02	0.011	3.34e-05	0.071
Accelerometer	Vigorous PA	VAT	rs7547571	1	85884091	G	T	90667	0.424	0.02	0.004	0.000255	<0.001	323796	0.424	-0.011	0.003	0.000106	0.0013
Accelerometer	Vigorous PA	VAT	rs77598509	19	31434505	G	A	90667	0.975	0.061	0.013	0.000237	<0.001	323796	0.975	-0.003	0.01	7.26e-07	0.79
Accelerometer	Vigorous PA	VAT	rs77981032	3	107044829	G	A	90667	0.953	0.046	0.01	0.000238	<0.001	323796	0.953	-0.005	0.008	4.04e-06	0.53
Accelerometer	Vigorous PA	VAT	rs78830914	5	91839971	A	G	90667	0.971	-0.059	0.012	0.000254	<0.001	323796	0.971	0.018	0.01	3.46e-05	0.066
Accelerometer	Vigorous PA	VAT	rs80028338	17	44161470	A	C	90667	0.795	-0.028	0.005	0.000304	<0.001	323796	0.795	0.005	0.004	1.41e-05	0.24
Accelerometer	Overall Activity	VAT	rs111205056	1	84358066	T	C	91105	0.962	0.066	0.013	0.000281	<0.001	323796	0.963	0	0.01	6.43e-09	0.98
Accelerometer	Overall Activity	VAT	rs12045968	1	33690698	T	G	91105	0.783	-0.028	0.005	0.000309	<0.001	323796	0.783	0.002	0.004	3.66e-06	0.55
Accelerometer	Overall Activity	VAT	rs159963	1	8504421	C	A	91105	0.422	0.021	0.005	0.000235	<0.001	323796	0.422	-0.005	0.003	2.61e-05	0.11
Accelerometer	Overall Activity	VAT	rs34517439	1	78450517	C	A	91105	0.879	0.037	0.007	0.000327	<0.001	323796	0.879	-0.027	0.005	0.000302	<0.001
Accelerometer	Overall Activity	VAT	rs6541235	1	219872389	C	T	91105	0.852	0.03	0.006	0.00025	<0.001	323796	0.852	-0.01	0.005	4.55e-05	0.035
Accelerometer	Overall Activity	VAT	rs791273	1	147234618	A	G	91105	0.748	-0.026	0.005	0.000274	<0.001	323796	0.749	0.005	0.004	2.02e-05	0.16
